# Supplementary material for: A systematic comprehensive longitudinal evaluation of dietary factors associated with acute myocardial infarction and fatal coronary heart disease
Source: PubMed Central journal article supplement (PMC7699643; doi:10.1038/s41467-020-19888-2), 2020-11-27
Supplement: 41467_2020_19888_MOESM1_ESM.pdf [file 41467_2020_19888_MOESM1_ESM.pdf]

A Systematic Comprehensive Longitudinal Evaluation of Dietary Factors  
Associated with Acute Myocardial Infarction and Fatal Coronary Heart  
Disease

Soodabeh Milanlouei<sup>1†</sup>, Giulia Menichetti<sup>1†</sup>, Yanping Li<sup>2</sup>,  
Joseph Loscalzo<sup>3</sup>, Walter C Willett<sup>2,3</sup>, Albert-László Barabási<sup>1,3,4\*</sup>

<sup>1</sup>Center for Complex Network Research, Northeastern University, Boston, USA

<sup>2</sup>Department of Nutrition, Harvard T.H. Chan School of Public Health, Boston, USA

<sup>3</sup>Channing Division of Network Medicine, Department of Medicine, Brigham and Women's Hospital,  
Boston, USA

<sup>4</sup>Center for Network Science, Central European University, Budapest, Hungary

---

<sup>†</sup>These authors contributed equally.

\*Corresponding author. e-mail: alb@neu.edu

## SUPPLEMENTARY INFORMATION

### Contents

|          |                                                   |           |
|----------|---------------------------------------------------|-----------|
| <b>1</b> | <b>Supplementary Tables</b>                       | <b>3</b>  |
| <b>2</b> | <b>Supplementary Figures</b>                      | <b>27</b> |
| <b>3</b> | <b>Supplementary Methods</b>                      | <b>33</b> |
| 3.1      | Participant Selection . . . . .                   | 33        |
| 3.2      | Cumulative Average of Dietary Exposures . . . . . | 33        |
| 3.3      | Multiple Testing . . . . .                        | 34        |
|          | <b>Supplementary References</b>                   | <b>37</b> |

## 1 Supplementary Tables

Supplementary Table 1: **Population Characteristics.** Characteristics of the Study Participants in NHS I at Baseline.

|                                 | Control                 | Case            |
|---------------------------------|-------------------------|-----------------|
| Population                      | 60,037 (96%)            | 2,774 (4%)      |
| Age (year)                      | 52.5* (7.1 $\diamond$ ) | 56.2 (6.5)      |
| BMI (kg/m <sup>2</sup> )        | 25.1 (4.6)              | 26.1 (5.1)      |
| Physical activity (MET/week)    | 14.2 (20.3)             | 13.4 (22.7)     |
| Calorie intake (kcal/day)       | 1,768.5 (524.9)         | 1,772.8 (551.7) |
| Aspirin use (%)                 | 68%                     | 68%             |
| Multi-vitamin use (%)           | 42%                     | 40%             |
| Vitamin E use (%)               | 16%                     | 14%             |
| Ever use of hormone therapy (%) | 67%                     | 58%             |
| Ever smoked (%)                 | 55%                     | 64%             |
| Family history of MI (%)        | 24%                     | 35%             |
| Family history of HBP (%)       | 49%                     | 53%             |
| Elevated cholesterol level (%)  | 6%                      | 11%             |
| HBP (%)                         | 14%                     | 26%             |

BMI, Body Mass Index; MI, Myocardial Infarction; HBP, High Blood Pressure

\* Mean

$\diamond$  Standard deviation

Supplementary Table 2: **Descriptive Characteristics of Exposures.** s/d: serving per day.

| Type     | Unit | Exposure                               | Mean (SD)           | Median (25th and 75th percentiles) |
|----------|------|----------------------------------------|---------------------|------------------------------------|
| Nutrient | mcg  | Alpha carotene                         | 781.66 (654.63)     | 610 (402.00, 943.00)               |
| Nutrient | mcg  | Acrylamide                             | 18.24 (9.48)        | 16.92 (12.01, 22.57)               |
| Nutrient | gm   | Discretionary liquid fat               | 9.30 (6.25)         | 7.97 (4.99, 11.98)                 |
| Nutrient | gm   | Discretionary solid fat                | 38.81 (16.21)       | 36.65 (27.22, 48.03)               |
| Nutrient | gm   | Added sugar                            | 41.66 (26.78)       | 36.04 (23.25, 53.29)               |
| Nutrient | gm   | Animal fat                             | 36.06 (14.60)       | 34.1 (25.70, 44.20)                |
| Nutrient | gm   | Alanine                                | 3.93 (1.29)         | 3.79 (3.02, 4.67)                  |
| Nutrient | gm   | Alcohol                                | 6.31 (10.76)        | 1.8 (0.00, 7.80)                   |
| Nutrient | gm   | Alpha linolenic                        | 0.91 (0.42)         | 0.83 (0.61, 1.13)                  |
| Nutrient | gm   | Total fiber                            | 19.06 (7.59)        | 18 (13.80, 23.10)                  |
| Nutrient | gm   | Animal protein                         | 59.16 (21.33)       | 57 (44.20, 71.50)                  |
| Nutrient | gm   | Arginine                               | 4.57 (1.50)         | 4.42 (3.53, 5.43)                  |
| Nutrient | gm   | Aspartic acid                          | 7.16 (2.27)         | 6.93 (5.56, 8.50)                  |
| Nutrient | mg   | Dietary thiamine                       | 1.33 (0.47)         | 1.28 (1.00, 1.61)                  |
| Nutrient | mcg  | Dietary vitamin B12                    | 7.12 (4.27)         | 6.3 (4.60, 8.40)                   |
| Nutrient | mcg  | Total vitamin B12                      | 10.90 (16.91)       | 8 (6.00, 12.00)                    |
| Nutrient | mg   | Thiamine                               | 4.22 (7.90)         | 1.75 (1.20, 3.19)                  |
| Nutrient | mg   | Dietary riboflavin                     | 1.77 (0.66)         | 1.68 (1.29, 2.16)                  |
| Nutrient | mg   | Total riboflavin                       | 4.60 (7.66)         | 2.33 (1.55, 3.94)                  |
| Nutrient | mg   | Dietary pyridoxine                     | 1.94 (0.68)         | 1.86 (1.47, 2.32)                  |
| Nutrient | mg   | Total pyridoxine                       | 8.91 (25.27)        | 2.5 (1.80, 4.50)                   |
| Nutrient | mg   | Natural vitamin B6                     | 1.86 (0.63)         | 1.78 (1.42, 2.20)                  |
| Nutrient | mg   | Synthetic vitamin B6                   | 0.14 (0.26)         | 0.03 (0.00, 0.18)                  |
| Nutrient | mcg  | Dietary beta carotene                  | 4,285.78 (2,645.66) | 3713 (2,554.00, 5,365.00)          |
| Nutrient | mcg  | Total beta carotene                    | 4,367.91 (2,762.11) | 3737 (2,564.00, 5,441.00)          |
| Nutrient | mcg  | Beta cryptoxanthin                     | 197.81 (129.21)     | 180.6 (101.80, 259.90)             |
| Nutrient | ug   | Bergamottin                            | 216.57 (353.68)     | 81 (0.40, 251.70)                  |
| Nutrient | ug   | Bergapten                              | 0.98 (1.63)         | 0.44 (0.22, 1.02)                  |
| Nutrient | ug   | Bergaptol                              | 32.74 (94.67)       | 1.4 (0.00, 29.50)                  |
| Nutrient | mg   | Dietary betaine                        | 107.13 (50.83)      | 97.5 (72.70, 131.40)               |
| Nutrient | mg   | Choline derivative betaine             | 107.17 (50.84)      | 97.5 (72.70, 131.50)               |
| Nutrient | mg   | Sum of betaine and choline             | 465.81 (146.56)     | 450.2 (362.70, 551.40)             |
| Nutrient | mg   | Biochanin A                            | 0.07 (0.05)         | 0.05 (0.02, 0.10)                  |
| Nutrient | gm   | Added bran from wheat, rice, oat, corn | 1.71 (5.05)         | 0 (0.00, 0.80)                     |
| Nutrient | gm   | Natural bran                           | 2.01 (2.27)         | 1.3 (0.50, 2.70)                   |
| Nutrient | mg   | Caffeine                               | 294.65 (228.43)     | 253 (108.00, 409.00)               |
| Nutrient | mg   | Dietary calcium                        | 791.73 (360.88)     | 716 (531.00, 992.00)               |
| Nutrient | mg   | Total calcium                          | 1,141.69 (547.34)   | 1068 (713.00, 1,484.00)            |
| Nutrient | gm   | Carbohydrates                          | 214.15 (74.54)      | 206 (161.00, 258.00)               |
| Nutrient | gm   | Cereal fiber                           | 4.90 (3.54)         | 4.1 (2.70, 6.10)                   |
| Nutrient | mg   | Cholesterol                            | 262.57 (102.49)     | 252 (191.00, 319.00)               |
| Nutrient | mg   | Dietary choline                        | 349.05 (106.78)     | 339 (273.80, 412.90)               |
| Nutrient | mg   | Total choline (no betaine)             | 358.64 (115.67)     | 345.5 (277.50, 424.40)             |
| Nutrient | gm   | Fiber from cruciferous veg             | 1.12 (0.88)         | 0.9 (0.60, 1.50)                   |
| Nutrient | gm   | Crude fiber                            | 5.56 (2.31)         | 5.2 (4.00, 6.80)                   |
| Nutrient | mg   | Dietary copper                         | 1.48 (0.50)         | 1.4 (1.10, 1.70)                   |
| Nutrient | mg   | Total copper                           | 1.72 (0.90)         | 1.5 (1.20, 1.90)                   |
| Nutrient | mg   | Sulfur from cysteine                   | 315.79 (112.30)     | 300.4 (234.50, 382.00)             |
| Nutrient | gm   | Cystine                                | 1.00 (0.31)         | 0.97 (0.78, 1.18)                  |
| Nutrient | mg   | Daidzein                               | 0.33 (0.68)         | 0.22 (0.11, 0.33)                  |
| Nutrient | mg   | Dairy calcium                          | 490.98 (316.05)     | 417.4 (261.70, 629.30)             |
| Nutrient | gm   | Dairy fat                              | 15.08 (8.59)        | 13.47 (9.25, 18.87)                |
| Nutrient | gm   | Dairy protein                          | 16.76 (9.96)        | 14.52 (9.60, 22.42)                |
| Nutrient | IU   | Dairy vitamin D                        | 108.93 (97.03)      | 90.3 (32.70, 126.70)               |
| Nutrient | mcg  | Dihydrovitamin K                       | 18.64 (10.88)       | 16.42 (10.94, 24.01)               |
| Nutrient | mg   | Dietary alpha tocopherol               | 9.11 (3.56)         | 8.57 (6.71, 10.83)                 |
| Nutrient | mg   | Total vitamin E                        | 41.63 (77.90)       | 11.4 (7.90, 19.70)                 |
| Nutrient | mg   | Epiprogoitrin                          | 0.02 (0.01)         | 0.01 (0.01, 0.03)                  |
| Nutrient | mg   | Food supplemented alpha tocopherol     | 0.23 (1.48)         | 0 (0.00, 0.00)                     |
| Nutrient | gm   | Asparagine                             | 2.91 (0.92)         | 2.82 (2.26, 3.45)                  |

Supplementary Table 2. cont.

| Type     | Unit | Exposure                             | Mean (SD)       | Median (25th and 75th percentiles) |
|----------|------|--------------------------------------|-----------------|------------------------------------|
| Nutrient | gm   | Cysteine                             | 1.39 (0.43)     | 1.35 (1.09, 1.65)                  |
| Nutrient | gm   | Glutamine                            | 7.27 (2.27)     | 7.04 (5.65, 8.66)                  |
| Nutrient | gm   | Capric acid                          | 0.34 (0.19)     | 0.31 (0.21, 0.43)                  |
| Nutrient | gm   | Lauric acid                          | 0.46 (0.31)     | 0.37 (0.26, 0.55)                  |
| Nutrient | gm   | Myristic acid                        | 2.02 (0.96)     | 1.86 (1.37, 2.49)                  |
| Nutrient | gm   | Palmitic acid                        | 12.15 (4.58)    | 11.55 (8.89, 14.77)                |
| Nutrient | gm   | Palmitoleic acid                     | 1.31 (0.52)     | 1.25 (0.94, 1.61)                  |
| Nutrient | gm   | Stearic acid                         | 5.49 (2.23)     | 5.18 (3.91, 6.73)                  |
| Nutrient | gm   | Oleic acid                           | 21.70 (8.32)    | 20.6 (15.80, 26.40)                |
| Nutrient | gm   | Linoleic acid                        | 10.43 (4.47)    | 9.8 (7.30, 12.80)                  |
| Nutrient | gm   | Linolenic acid                       | 1.11 (0.43)     | 1.05 (0.80, 1.35)                  |
| Nutrient | gm   | Eicosenoic acid                      | 0.16 (0.11)     | 0.14 (0.08, 0.21)                  |
| Nutrient | gm   | Arachadonic acid                     | 0.15 (0.06)     | 0.14 (0.11, 0.18)                  |
| Nutrient | gm   | EPA fatty acid                       | 0.08 (0.08)     | 0.05 (0.03, 0.11)                  |
| Nutrient | gm   | 22:5 fatty acid                      | 0.02 (0.02)     | 0.02 (0.01, 0.03)                  |
| Nutrient | gm   | DHA fatty acid                       | 0.16 (0.12)     | 0.12 (0.07, 0.20)                  |
| Nutrient | gm   | Butyric acid                         | 0.42 (0.26)     | 0.37 (0.25, 0.53)                  |
| Nutrient | gm   | Caproic acid                         | 0.24 (0.16)     | 0.2 (0.13, 0.30)                   |
| Nutrient | gm   | Caprylic acid                        | 0.13 (0.08)     | 0.12 (0.08, 0.17)                  |
| Nutrient | mcg  | Dietary folate                       | 308.33 (121.22) | 292 (224.00, 372.00)               |
| Nutrient | mcg  | Total folate                         | 424.15 (233.34) | 356 (254.00, 562.00)               |
| Nutrient | mcg  | Supplemental or fortified folic acid | 155.10 (204.49) | 57.3 (8.00, 247.60)                |
| Nutrient | mg   | Formononetin                         | 0.05 (0.04)     | 0.04 (0.02, 0.07)                  |
| Nutrient | mg   | Dietary free choline                 | 79.38 (23.98)   | 77 (62.60, 93.40)                  |
| Nutrient | mg   | Total free choline                   | 81.43 (29.03)   | 77.5 (62.90, 94.40)                |
| Nutrient | gm   | Fruit fiber                          | 4.52 (3.16)     | 3.9 (2.30, 6.00)                   |
| Nutrient | gm   | Fruit carbohydrate minus juice sugar | 33.09 (20.87)   | 29.34 (18.32, 43.30)               |
| Nutrient | gm   | Fructose                             | 24.14 (13.03)   | 21.72 (15.31, 29.91)               |
| Nutrient | ug   | 6'7'-Dihydroxybergamottin            | 269.67 (424.31) | 118.3 (0.60, 263.20)               |
| Nutrient | ug   | Total furocoumarins                  | 519.93 (838.84) | 201 (2.00, 596.00)                 |
| Nutrient | mg   | Genistein                            | 0.30 (0.86)     | 0.15 (0.10, 0.21)                  |
| Nutrient | gm   | Added germ from wheat                | 0.26 (1.20)     | 0 (0.00, 0.20)                     |
| Nutrient | gm   | Natural germ                         | 0.53 (0.61)     | 0.4 (0.20, 0.70)                   |
| Nutrient | mg   | Glucoalyssin                         | 0.10 (0.10)     | 0.06 (0.05, 0.19)                  |
| Nutrient | mg   | Glucobarbarin                        | 0.03 (0.03)     | 0.02 (0.01, 0.07)                  |
| Nutrient | mg   | Glucoiberin                          | 0.74 (0.88)     | 0.55 (0.22, 0.98)                  |
| Nutrient | mg   | Glucobrassicinapin                   | 0.11 (0.11)     | 0.08 (0.04, 0.23)                  |
| Nutrient | mg   | Glucobrassicin                       | 3.96 (3.50)     | 3.03 (1.79, 5.22)                  |
| Nutrient | mg   | Glucocheirolin                       | 0.05 (0.10)     | 0 (0.00, 0.11)                     |
| Nutrient | mg   | Glucoerucin                          | 0.02 (0.02)     | 0.01 (0.01, 0.03)                  |
| Nutrient | mg   | Glucoerysolin                        | 0.02 (0.03)     | 0 (0.00, 0.04)                     |
| Nutrient | mg   | Glucoibervirin                       | 0.10 (0.10)     | 0.08 (0.05, 0.11)                  |
| Nutrient | mg   | Gluconapin                           | 0.11 (0.15)     | 0.05 (0.02, 0.17)                  |
| Nutrient | mg   | Gluconasturtiin                      | 0.06 (0.05)     | 0.04 (0.03, 0.08)                  |
| Nutrient | mg   | Glucoraphanin                        | 2.40 (2.22)     | 1.59 (0.97, 4.77)                  |
| Nutrient | mg   | Glucoraphenin                        | 0.02 (0.02)     | 0.01 (0.01, 0.02)                  |
| Nutrient | mg   | Total glucosinolates                 | 11.83 (10.27)   | 9.14 (5.18, 15.66)                 |
| Nutrient | gm   | Glucose                              | 21.93 (11.71)   | 19.67 (14.09, 26.90)               |
| Nutrient | gm   | Glutamic acid                        | 15.40 (4.96)    | 14.87 (11.88, 18.33)               |
| Nutrient | gm   | Gluten                               | 5.43 (2.57)     | 5.09 (3.59, 6.87)                  |
| Nutrient | mg   | Glycosolated B6                      | 0.27 (0.11)     | 0.3 (0.20, 0.30)                   |
| Nutrient | mg   | Glycitein                            | 0.03 (0.13)     | 0.01 (0.00, 0.01)                  |
| Nutrient | gm   | Glycine                              | 3.44 (1.14)     | 3.31 (2.64, 4.09)                  |
| Nutrient | mg   | Choline from glycerophosphocholine   | 55.11 (26.35)   | 49.42 (36.00, 67.88)               |
| Nutrient | mg   | Heme iron                            | 1.23 (0.59)     | 1.1 (0.80, 1.60)                   |
| Nutrient | gm   | Histidine                            | 2.29 (0.74)     | 2.22 (1.77, 2.73)                  |
| Nutrient | gm   | Hydroxyproline                       | 0.37 (0.16)     | 0.35 (0.26, 0.46)                  |
| Nutrient | mg   | 4-Hydroxyglucobrassicin              | 0.32 (0.29)     | 0.21 (0.14, 0.45)                  |
| Nutrient | mcg  | Supplemental iodine                  | 17.96 (50.54)   | 0 (0.00, 0.00)                     |
| Nutrient | gm   | Carbohydrate from intact wholegrain  | 3.78 (5.74)     | 1.97 (0.40, 5.25)                  |

Supplementary Table 2. cont.

| Type     | Unit | Exposure                                   | Mean (SD)           | Median (25th and 75th percentiles) |
|----------|------|--------------------------------------------|---------------------|------------------------------------|
| Nutrient | mg   | Dietary iron                               | 13.47 (6.00)        | 12.3 (9.80, 15.70)                 |
| Nutrient | mg   | Total iron                                 | 19.40 (15.90)       | 14.1 (10.50, 21.90)                |
| Nutrient | gm   | Isoleucine                                 | 3.79 (1.23)         | 3.66 (2.92, 4.52)                  |
| Nutrient | gm   | Sugar from fruit juice                     | 10.62 (10.52)       | 8.2 (2.47, 16.19)                  |
| Nutrient | mg   | Dietary potassium                          | 3,227.13 (998.80)   | 3126 (2,517.00, 3,829.00)          |
| Nutrient | mg   | Total potassium                            | 3,277.43 (1,022.49) | 3173 (2,550.00, 3,893.00)          |
| Nutrient | gm   | Lactose                                    | 14.69 (12.28)       | 12.5 (5.66, 17.91)                 |
| Nutrient | gm   | Dietary long chain fatty acid              | 0.26 (0.21)         | 0.2 (0.12, 0.34)                   |
| Nutrient | gm   | Total long chain fatty acid                | 0.26 (0.21)         | 0.2 (0.12, 0.34)                   |
| Nutrient | gm   | Carbohydrate from legumes                  | 5.16 (4.09)         | 4.45 (2.54, 6.53)                  |
| Nutrient | gm   | Fiber from legumes                         | 0.81 (0.89)         | 0.7 (0.30, 1.00)                   |
| Nutrient | gm   | Leucine                                    | 6.26 (2.02)         | 6.05 (4.82, 7.46)                  |
| Nutrient | mcg  | Lutein and zeaxanthin                      | 3,122.07 (2,312.92) | 2675 (1,776.00, 3,809.00)          |
| Nutrient | mcg  | Lycopene                                   | 7,258.96 (4,904.80) | 6100 (4,264.00, 8,848.00)          |
| Nutrient | gm   | Lysine                                     | 5.77 (1.92)         | 5.57 (4.41, 6.89)                  |
| Nutrient | mg   | Dietary magnesium                          | 310.25 (100.08)     | 299 (239.00, 368.00)               |
| Nutrient | mg   | Total magnesium                            | 321.47 (105.69)     | 309 (246.00, 383.00)               |
| Nutrient | gm   | Maltose                                    | 1.82 (1.00)         | 1.63 (1.13, 2.29)                  |
| Nutrient | mg   | Sulfur from methionine                     | 418.82 (139.86)     | 404.5 (321.30, 498.50)             |
| Nutrient | gm   | Methionine                                 | 1.92 (0.64)         | 1.86 (1.47, 2.30)                  |
| Nutrient | mg   | 4-Methoxyglucobrassicin                    | 0.44 (0.42)         | 0.35 (0.19, 0.60)                  |
| Nutrient | gm   | Carbohydrate from milled wholegrain        | 6.78 (8.95)         | 3.44 (1.59, 8.34)                  |
| Nutrient | mg   | Dietary manganese                          | 2.79 (1.14)         | 2.6 (2.00, 3.40)                   |
| Nutrient | mg   | Total manganese                            | 4.11 (8.50)         | 2.8 (2.00, 3.80)                   |
| Nutrient | gm   | Total MUFA                                 | 23.82 (8.98)        | 22.6 (17.40, 29.00)                |
| Nutrient | gm   | Animal MUFA                                | 12.84 (5.28)        | 12.14 (9.05, 15.84)                |
| Nutrient | gm   | Plant MUFA                                 | 10.61 (5.42)        | 9.65 (6.82, 13.27)                 |
| Nutrient | mg   | Sodium                                     | 3,125.43 (1,438.23) | 2857 (2,134.00, 3,793.00)          |
| Nutrient | mg   | Napoleiferin                               | 0.08 (0.08)         | 0.04 (0.04, 0.13)                  |
| Nutrient | gm   | Natural sugar                              | 59.99 (28.23)       | 56 (39.68, 76.07)                  |
| Nutrient | mg   | Neoglucobrassicin                          | 0.98 (0.87)         | 0.66 (0.42, 1.76)                  |
| Nutrient | mg   | Total niacin                               | 38.86 (33.01)       | 26.7 (19.30, 41.90)                |
| Nutrient | mg   | Dietary niacin                             | 21.34 (6.85)        | 20.5 (16.60, 25.20)                |
| Nutrient | mg   | Nitrate                                    | 156.16 (95.85)      | 140 (95.00, 191.00)                |
| Nutrient | gm   | Total dietary omega 3 (no alpha 18:3)      | 0.23 (0.20)         | 0.18 (0.10, 0.31)                  |
| Nutrient | gm   | Total dietary omega 3                      | 1.31 (0.53)         | 1.23 (0.93, 1.59)                  |
| Nutrient | gm   | Dietary omega 6 (no gamma 18:3)            | 10.58 (4.54)        | 9.89 (7.34, 13.00)                 |
| Nutrient | gm   | Total omega 3                              | 1.31 (0.53)         | 1.23 (0.93, 1.59)                  |
| Nutrient | gm   | Omega 3 (20:5+22:6, no alpha 18:3)         | 0.23 (0.20)         | 0.18 (0.10, 0.31)                  |
| Nutrient | mg   | Oxalate                                    | 179.78 (121.06)     | 159.2 (106.60, 218.40)             |
| Nutrient | mg   | Pantothenic acid                           | 11.49 (13.22)       | 5.9 (4.10, 14.20)                  |
| Nutrient | mg   | Choline from phosphocholine                | 15.91 (6.35)        | 14.93 (11.29, 19.58)               |
| Nutrient | mg   | Dietary phosphorous                        | 1,226.03 (409.37)   | 1177 (927.00, 1,477.00)            |
| Nutrient | mg   | Total phosphorous                          | 1,228.40 (409.80)   | 1180 (929.00, 1,480.00)            |
| Nutrient | gm   | Phenylalanine                              | 3.44 (1.09)         | 3.33 (2.66, 4.09)                  |
| Nutrient | mg   | Phytate                                    | 768.46 (357.62)     | 704 (526.00, 934.00)               |
| Nutrient | gm   | Total polyunsaturated fat                  | 12.10 (4.94)        | 11.4 (8.60, 14.80)                 |
| Nutrient | gm   | Carbohydrate from potato                   | 15.62 (11.21)       | 15.17 (6.87, 20.10)                |
| Nutrient | mg   | Proanthocyanidin, 4-6mers                  | 23.75 (16.73)       | 20.11 (12.28, 31.10)               |
| Nutrient | mg   | Proanthocyanidin, 7-10mers                 | 17.63 (13.36)       | 14.43 (8.52, 23.15)                |
| Nutrient | gm   | Proline                                    | 4.85 (1.58)         | 4.68 (3.71, 5.82)                  |
| Nutrient | mg   | Proanthocyanidin, dimers                   | 20.09 (14.05)       | 16.76 (10.29, 26.33)               |
| Nutrient | mg   | Progointrin                                | 0.40 (0.58)         | 0.17 (0.08, 0.66)                  |
| Nutrient | mg   | Proanthocyanidin, monomers                 | 22.25 (23.54)       | 13.57 (7.56, 27.36)                |
| Nutrient | mg   | Proanthocyanidin, polymers                 | 37.31 (29.32)       | 31.31 (18.47, 48.69)               |
| Nutrient | mg   | Sum of sulfur from methionine and cysteine | 734.61 (245.28)     | 709 (561.00, 879.00)               |
| Nutrient | gm   | Protein                                    | 22.16 (7.87)        | 21.2 (16.60, 26.60)                |
| Nutrient | mg   | Proanthocyanidin, trimers                  | 8.99 (5.45)         | 7.94 (5.17, 11.61)                 |
| Nutrient | mg   | Dietary choline from phosphatidylcholine   | 177.91 (63.77)      | 171.3 (134.00, 213.00)             |
| Nutrient | mg   | Choline from phosphatidylcholine           | 185.46 (73.53)      | 174.5 (135.70, 220.10)             |

Supplementary Table 2. cont.

| Type     | Unit | Exposure                                        | Mean (SD)           | Median (25th and 75th percentiles) |
|----------|------|-------------------------------------------------|---------------------|------------------------------------|
| Nutrient | gm   | Carbohydrate from refined grain                 | 47.70 (22.43)       | 44.29 (31.77, 60.08)               |
| Nutrient | mcg  | Dietary retinol                                 | 2,091.16 (1,519.12) | 1749 (1,134.00, 2,536.00)          |
| Nutrient | mcg  | Total retinol                                   | 4,424.88 (4,750.47) | 2668 (1,494.00, 6,283.00)          |
| Nutrient | gm   | Total saturated fat                             | 23.06 (8.88)        | 21.9 (16.80, 28.10)                |
| Nutrient | mcg  | Supplemental selenium                           | 3.77 (18.18)        | 0 (0.00, 0.00)                     |
| Nutrient | gm   | Serine                                          | 3.49 (1.11)         | 3.38 (2.69, 4.16)                  |
| Nutrient | mg   | Sinigrin                                        | 1.63 (2.09)         | 0.96 (0.30, 2.46)                  |
| Nutrient | mg   | Choline from sphingomyelin                      | 20.74 (7.89)        | 19.85 (15.40, 24.97)               |
| Nutrient | gm   | Starch                                          | 66.66 (26.51)       | 63.8 (48.10, 82.00)                |
| Nutrient | gm   | Sucrose                                         | 37.82 (18.91)       | 34.79 (24.55, 47.58)               |
| Nutrient | gm   | Total sugar                                     | 100.39 (44.55)      | 94.2 (68.90, 124.70)               |
| Nutrient | mg   | Dietary sulfur                                  | 1,088.93 (313.87)   | 1063 (868.00, 1,280.00)            |
| Nutrient | gm   | Carbohydrate from wholegrain                    | 10.56 (11.43)       | 6.87 (3.08, 14.37)                 |
| Nutrient | gm   | Trans 16:1                                      | 0.17 (0.07)         | 0.16 (0.12, 0.21)                  |
| Nutrient | gm   | Trans 18:1                                      | 2.75 (1.37)         | 2.51 (1.77, 3.50)                  |
| Nutrient | gm   | Trans 18:2                                      | 0.40 (0.21)         | 0.37 (0.26, 0.51)                  |
| Nutrient | gm   | Taurine                                         | 0.15 (0.07)         | 0.14 (0.10, 0.19)                  |
| Nutrient | gm   | Total fat                                       | 64.54 (23.03)       | 61.6 (48.10, 77.90)                |
| Nutrient | gm   | Threonine                                       | 3.20 (1.04)         | 3.1 (2.47, 3.82)                   |
| Nutrient | gm   | Isoflavones (no biochanin A or formononetin)    | 0.65 (1.66)         | 0.37 (0.23, 0.55)                  |
| Nutrient | gm   | Total isoflavones                               | 0.77 (1.67)         | 0.49 (0.33, 0.69)                  |
| Nutrient | mg   | Total anthocyanidins                            | 14.74 (17.21)       | 10.77 (5.09, 19.35)                |
| Nutrient | mg   | Total flavan-3-ols                              | 53.09 (68.33)       | 24 (13.00, 70.70)                  |
| Nutrient | mg   | Total flavanones                                | 46.75 (40.17)       | 40.41 (15.28, 64.47)               |
| Nutrient | mg   | Total flavonoids                                | 363.81 (320.38)     | 260.9 (158.00, 441.70)             |
| Nutrient | mg   | Total flavones                                  | 2.40 (1.55)         | 2.2 (1.25, 3.15)                   |
| Nutrient | mg   | Total flavonols                                 | 14.97 (10.25)       | 12.15 (8.10, 18.12)                |
| Nutrient | mg   | Total theaflavins and polymers proanthocyanidis | 229.28 (234.03)     | 149 (80.10, 280.10)                |
| Nutrient | gm   | Total trans fat                                 | 2.77 (1.39)         | 2.5 (1.78, 3.48)                   |
| Nutrient | gm   | Tryptophan                                      | 0.93 (0.30)         | 0.9 (0.72, 1.11)                   |
| Nutrient | gm   | Tyrosine                                        | 2.84 (0.92)         | 2.75 (2.18, 3.39)                  |
| Nutrient | mg   | Apigenin                                        | 0.37 (0.44)         | 0.26 (0.14, 0.43)                  |
| Nutrient | mg   | Alpha tocotrienol                               | 0.30 (0.18)         | 0.26 (0.18, 0.38)                  |
| Nutrient | mg   | Beta tocotrienol                                | 0.48 (0.48)         | 0.31 (0.20, 0.57)                  |
| Nutrient | mg   | Beta tocopherol                                 | 0.23 (0.15)         | 0.2 (0.15, 0.28)                   |
| Nutrient | mg   | Catechin                                        | 8.84 (6.61)         | 7.38 (4.45, 11.45)                 |
| Nutrient | mg   | Cyanidin                                        | 3.89 (3.62)         | 3.12 (1.54, 5.06)                  |
| Nutrient | mg   | Delphinidin                                     | 2.33 (3.95)         | 0.76 (0.39, 3.36)                  |
| Nutrient | mg   | Delta tocotrienol                               | 0.01 (0.02)         | 0 (0.00, 0.01)                     |
| Nutrient | mg   | Delta tocopherol                                | 2.04 (1.03)         | 1.87 (1.31, 2.57)                  |
| Nutrient | mg   | Epicatechin                                     | 9.44 (6.96)         | 7.69 (4.53, 12.42)                 |
| Nutrient | mg   | Epicatechin 3-gallate                           | 8.18 (14.27)        | 1.14 (0.02, 11.20)                 |
| Nutrient | mg   | Epigallocatechin                                | 11.78 (19.26)       | 2.58 (0.79, 16.82)                 |
| Nutrient | mg   | Eriodictyol                                     | 0.01 (0.02)         | 0 (0.00, 0.01)                     |
| Nutrient | mg   | Gallocatechin                                   | 1.71 (2.92)         | 0.29 (0.02, 2.52)                  |
| Nutrient | mg   | Gamma tocotrienol                               | 0.14 (0.11)         | 0.11 (0.07, 0.18)                  |
| Nutrient | mg   | Gamma tocopherol                                | 7.57 (3.38)         | 7.06 (5.17, 9.39)                  |
| Nutrient | mg   | Hesperetin                                      | 30.27 (28.98)       | 23.93 (7.01, 49.22)                |
| Nutrient | mg   | Isorhamnetin                                    | 0.10 (0.13)         | 0.07 (0.02, 0.12)                  |
| Nutrient | mg   | Kaempferol                                      | 3.13 (3.44)         | 1.81 (0.94, 3.88)                  |
| Nutrient | mg   | Luteolin                                        | 2.03 (1.41)         | 1.84 (0.96, 2.72)                  |
| Nutrient | mg   | Malvidin                                        | 3.54 (5.45)         | 1.56 (0.50, 4.80)                  |
| Nutrient | mg   | Myricetin                                       | 1.36 (1.16)         | 0.99 (0.63, 1.64)                  |
| Nutrient | mg   | Naringenin                                      | 16.48 (18.83)       | 10.91 (5.47, 21.30)                |
| Nutrient | mg   | Pelargonidin                                    | 2.95 (4.17)         | 2.03 (1.88, 3.30)                  |
| Nutrient | mg   | Peonidin                                        | 0.63 (0.97)         | 0.26 (0.09, 0.88)                  |
| Nutrient | mg   | Petunidin                                       | 1.31 (2.20)         | 0.43 (0.21, 1.89)                  |
| Nutrient | mg   | Quercetin                                       | 10.38 (6.22)        | 8.92 (6.02, 13.07)                 |
| Nutrient | mg   | Flavonoids (no proanthocyanidins)               | 252.37 (293.85)     | 137.3 (76.30, 320.55)              |
| Nutrient | mg   | Theaflavin                                      | 2.20 (3.84)         | 0.3 (0.00, 3.00)                   |

Supplementary Table 2. cont.

| Type     | Unit | Exposure                                       | Mean (SD)            | Median (25th and 75th percentiles) |
|----------|------|------------------------------------------------|----------------------|------------------------------------|
| Nutrient | mg   | Thearubigins                                   | 113.06 (197.75)      | 15 (0.00, 154.00)                  |
| Nutrient | mg   | Dietary tocopherols                            | 16.50 (6.50)         | 15.57 (11.89, 20.01)               |
| Nutrient | gm   | Valine                                         | 4.15 (1.34)          | 4.02 (3.20, 4.95)                  |
| Nutrient | gm   | Vegetable fiber                                | 6.68 (3.23)          | 6.1 (4.50, 8.20)                   |
| Nutrient | gm   | Vegetable fat                                  | 28.48 (13.25)        | 26.3 (19.10, 35.30)                |
| Nutrient | IU   | Dietary vitamin A                              | 11,572.67 (6,703.76) | 10088 (7,140.00, 14,414.00)        |
| Nutrient | IU   | Total vitamin A                                | 14,043.27 (8,545.85) | 12158 (8,326.50, 17,599.50)        |
| Nutrient | mg   | Dietary vitamin C                              | 161.71 (85.17)       | 148 (104.00, 201.00)               |
| Nutrient | mg   | Total vitamin C                                | 354.56 (366.57)      | 213 (134.00, 398.00)               |
| Nutrient | IU   | Dietary vitamin D                              | 217.77 (133.83)      | 188.7 (124.00, 288.50)             |
| Nutrient | IU   | Total vitamin D                                | 358.70 (258.26)      | 291.3 (159.60, 518.30)             |
| Nutrient | mcg  | Dietary phyloquinone vitamin K1                | 188.13 (114.23)      | 166.9 (117.60, 230.55)             |
| Nutrient | mcg  | Menaquinone vitamin K2 (4 isoprenoid residues) | 21.89 (10.62)        | 20.48 (14.64, 26.68)               |
| Nutrient | mcg  | Phylloquinone vitamin K1                       | 189.19 (114.41)      | 167.9 (118.40, 232.00)             |
| Nutrient | gm   | Vegetable protein                              | 22.16 (7.87)         | 21.2 (16.60, 26.60)                |
| Nutrient | mg   | Dietary zinc                                   | 12.34 (4.35)         | 11.8 (9.30, 14.80)                 |
| Nutrient | mg   | Total zinc                                     | 16.58 (13.64)        | 12.9 (9.90, 17.40)                 |
| Food     | s/d  | Apple juice or cider                           | 0.07 (0.18)          | 0 (0.00, 0.07)                     |
| Food     | s/d  | Apple and pear                                 | 0.36 (0.39)          | 0.21 (0.07, 0.50)                  |
| Food     | s/d  | Avocado                                        | 0.02 (0.06)          | 0 (0.00, 0.00)                     |
| Food     | s/d  | Bacon                                          | 0.09 (0.15)          | 0.07 (0.00, 0.14)                  |
| Food     | s/d  | banana                                         | 0.26 (0.30)          | 0.14 (0.07, 0.43)                  |
| Food     | s/d  | Beans or lentils                               | 0.07 (0.10)          | 0.07 (0.00, 0.07)                  |
| Food     | s/d  | Beer                                           | 0.08 (0.35)          | 0 (0.00, 0.00)                     |
| Food     | s/d  | Blueberries                                    | 0.05 (0.11)          | 0 (0.00, 0.07)                     |
| Food     | s/d  | Beef or lamb as a main dish                    | 0.26 (0.23)          | 0.14 (0.14, 0.43)                  |
| Food     | s/d  | Beef/pork/lamb as a sandwich                   | 0.16 (0.16)          | 0.14 (0.07, 0.14)                  |
| Food     | s/d  | Brown rice                                     | 0.04 (0.09)          | 0 (0.00, 0.07)                     |
| Food     | s/d  | Broccoli                                       | 0.21 (0.20)          | 0.14 (0.07, 0.43)                  |
| Food     | s/d  | Brussels sprouts                               | 0.03 (0.07)          | 0 (0.00, 0.07)                     |
| Food     | s/d  | Butter                                         | 0.34 (0.71)          | 0 (0.00, 0.43)                     |
| Food     | s/d  | Cabbage                                        | 0.07 (0.11)          | 0.07 (0.00, 0.07)                  |
| Food     | s/d  | Cake                                           | 0.08 (0.12)          | 0.07 (0.00, 0.14)                  |
| Food     | s/d  | Cantaloupe                                     | 0.12 (0.17)          | 0.07 (0.00, 0.14)                  |
| Food     | s/d  | Cauliflower                                    | 0.11 (0.14)          | 0.07 (0.07, 0.14)                  |
| Food     | s/d  | Cooked carrot                                  | 0.11 (0.15)          | 0.07 (0.07, 0.14)                  |
| Food     | s/d  | Candy bar                                      | 0.05 (0.13)          | 0 (0.00, 0.07)                     |
| Food     | s/d  | Candy without chocolate                        | 0.08 (0.25)          | 0 (0.00, 0.07)                     |
| Food     | s/d  | Celery                                         | 0.21 (0.32)          | 0.07 (0.07, 0.43)                  |
| Food     | s/d  | Cold breakfast cereal                          | 0.32 (0.38)          | 0.14 (0.07, 0.43)                  |
| Food     | s/d  | Chocolate bars                                 | 0.10 (0.23)          | 0.07 (0.00, 0.07)                  |
| Food     | s/d  | Chowder/cream soup                             | 0.05 (0.08)          | 0 (0.00, 0.07)                     |
| Food     | s/d  | Chicken or turkey, with skin                   | 0.11 (0.16)          | 0.07 (0.00, 0.14)                  |
| Food     | s/d  | Chicken/turkey, without skin                   | 0.25 (0.18)          | 0.22 (0.12, 0.34)                  |
| Food     | s/d  | Other cooked cereal                            | 0.03 (0.11)          | 0 (0.00, 0.00)                     |
| Food     | s/d  | Coffee                                         | 1.28 (1.24)          | 1 (0.07, 2.16)                     |
| Food     | s/d  | Non-dairy coffee whitener                      | 0.27 (0.87)          | 0 (0.00, 0.00)                     |
| Food     | s/d  | Cookies                                        | 0.41 (0.70)          | 0.14 (0.07, 0.43)                  |
| Food     | s/d  | Corn                                           | 0.12 (0.13)          | 0.07 (0.07, 0.14)                  |
| Food     | s/d  | Cottage ricotta cheese                         | 0.15 (0.24)          | 0.07 (0.00, 0.14)                  |
| Food     | s/d  | Crackers                                       | 0.31 (0.60)          | 0.14 (0.07, 0.43)                  |
| Food     | s/d  | Cream                                          | 0.26 (0.69)          | 0.07 (0.00, 0.14)                  |
| Food     | s/d  | Cream cheese                                   | 0.06 (0.12)          | 0 (0.00, 0.07)                     |
| Food     | s/d  | Cooked spinach                                 | 0.06 (0.10)          | 0.07 (0.00, 0.07)                  |
| Food     | s/d  | Canned tuna                                    | 0.15 (0.17)          | 0.14 (0.07, 0.14)                  |
| Food     | s/d  | Decaffeinated coffee                           | 0.42 (0.79)          | 0 (0.00, 0.50)                     |
| Food     | s/d  | Wholegrain bread                               | 0.65 (0.80)          | 0.43 (0.07, 0.79)                  |
| Food     | s/d  | Dark m,eat fish                                | 0.04 (0.08)          | 0 (0.00, 0.07)                     |
| Food     | s/d  | Doughnuts                                      | 0.06 (0.11)          | 0.07 (0.00, 0.07)                  |
| Food     | s/d  | Eggplnt, zucchini, summer squash               | 0.09 (0.13)          | 0.07 (0.00, 0.14)                  |



Supplementary Table 2. cont.

| Type | Unit Exposure                      | Mean (SD)   | Median (25th and 75th percentiles) |
|------|------------------------------------|-------------|------------------------------------|
| Food | s/d Egg                            | 0.29 (0.28) | 0.14 (0.07, 0.43)                  |
| Food | s/d English muffins/bagels/rolls   | 0.18 (0.25) | 0.07 (0.07, 0.14)                  |
| Food | s/d French fried potatoes          | 0.06 (0.08) | 0.07 (0.00, 0.07)                  |
| Food | s/d Grapefruit and juice           | 0.23 (0.39) | 0.07 (0.00, 0.28)                  |
| Food | s/d Green/red peppers              | 0.18 (0.26) | 0.07 (0.00, 0.14)                  |
| Food | s/d Plain water                    | 2.68 (1.85) | 2.5 (1.00, 4.50)                   |
| Food | s/d Hamburger                      | 0.15 (0.14) | 0.14 (0.07, 0.14)                  |
| Food | s/d Hotdog                         | 0.07 (0.10) | 0.07 (0.00, 0.07)                  |
| Food | s/d Ice cream                      | 0.19 (0.28) | 0.07 (0.07, 0.14)                  |
| Food | s/d Iceberg or head lettuce        | 0.55 (0.46) | 0.43 (0.14, 0.79)                  |
| Food | s/d Jams, jellies                  | 0.21 (0.33) | 0.07 (0.00, 0.14)                  |
| Food | s/d Kale                           | 0.01 (0.06) | 0 (0.00, 0.00)                     |
| Food | s/d Ketchup or red chili sauce     | 0.02 (0.09) | 0 (0.00, 0.00)                     |
| Food | s/d Liquor                         | 0.19 (0.52) | 0 (0.00, 0.07)                     |
| Food | s/d Beef liver                     | 0.02 (0.02) | 0.02 (0.00, 0.02)                  |
| Food | s/d Chicken liver                  | 0.01 (0.02) | 0 (0.00, 0.02)                     |
| Food | s/d Low caff beverages             | 0.51 (0.85) | 0.14 (0.00, 0.79)                  |
| Food | s/d 1% -2% milk                    | 0.39 (0.69) | 0.07 (0.00, 0.43)                  |
| Food | s/d Margarine                      | 0.88 (0.99) | 0.43 (0.07, 1.00)                  |
| Food | s/d Mayo                           | 0.28 (0.32) | 0.14 (0.07, 0.43)                  |
| Food | s/d Mixed vegetables               | 0.08 (0.13) | 0.07 (0.00, 0.14)                  |
| Food | s/d Muffins or biscuits            | 0.09 (0.16) | 0.07 (0.00, 0.07)                  |
| Food | s/d Cooked oatmeal/oatbran         | 0.06 (0.15) | 0 (0.00, 0.07)                     |
| Food | s/d Other fish                     | 0.11 (0.13) | 0.07 (0.07, 0.14)                  |
| Food | s/d Onions as a garnish            | 0.31 (0.39) | 0.14 (0.07, 0.43)                  |
| Food | s/d Cooked onions                  | 0.12 (0.24) | 0.07 (0.00, 0.14)                  |
| Food | s/d Other nuts                     | 0.06 (0.15) | 0 (0.00, 0.07)                     |
| Food | s/d Olive oil                      | 0.16 (0.33) | 0 (0.00, 0.14)                     |
| Food | s/d Oranges                        | 0.20 (0.29) | 0.07 (0.07, 0.14)                  |
| Food | s/d Orange juice                   | 0.46 (0.55) | 0.43 (0.07, 1.00)                  |
| Food | s/d Other cheese                   | 0.34 (0.30) | 0.29 (0.14, 0.43)                  |
| Food | s/d Other fruit juices             | 0.14 (0.32) | 0 (0.00, 0.14)                     |
| Food | s/d Pasta                          | 0.16 (0.14) | 0.14 (0.07, 0.14)                  |
| Food | s/d Peanut butter                  | 0.20 (0.34) | 0.07 (0.00, 0.14)                  |
| Food | s/d Pancakes or waffles            | 0.04 (0.07) | 0 (0.00, 0.07)                     |
| Food | s/d Potato chips or corn chips     | 0.12 (0.21) | 0.07 (0.00, 0.14)                  |
| Food | s/d Popcorn                        | 0.12 (0.26) | 0.07 (0.00, 0.14)                  |
| Food | s/d Peach/apricot                  | 0.18 (0.26) | 0.14 (0.07, 0.21)                  |
| Food | s/d Peas, or lima beans            | 0.13 (0.14) | 0.07 (0.07, 0.14)                  |
| Food | s/d Pie                            | 0.06 (0.08) | 0.07 (0.00, 0.07)                  |
| Food | s/d Pizza                          | 0.07 (0.08) | 0.07 (0.00, 0.07)                  |
| Food | s/d Pork as a main dish            | 0.08 (0.08) | 0.07 (0.00, 0.14)                  |
| Food | s/d Peanuts                        | 0.09 (0.22) | 0.07 (0.00, 0.07)                  |
| Food | s/d Potatoes, baked/boiled/mashed  | 0.33 (0.28) | 0.43 (0.14, 0.43)                  |
| Food | s/d All processed meats            | 0.13 (0.21) | 0.07 (0.00, 0.14)                  |
| Food | s/d Prune                          | 0.04 (0.20) | 0 (0.00, 0.00)                     |
| Food | s/d Punch                          | 0.09 (0.28) | 0 (0.00, 0.07)                     |
| Food | s/d Raisins or grapes              | 0.11 (0.23) | 0.07 (0.00, 0.07)                  |
| Food | s/d Raw carrots                    | 0.22 (0.34) | 0.14 (0.07, 0.43)                  |
| Food | s/d Romaine or leaf lettuce        | 0.17 (0.32) | 0.07 (0.00, 0.14)                  |
| Food | s/d Raw spinach                    | 0.05 (0.10) | 0 (0.00, 0.07)                     |
| Food | s/d Red wine                       | 0.06 (0.23) | 0 (0.00, 0.07)                     |
| Food | s/d Salad/oil and vinegar dressing | 0.27 (0.35) | 0.14 (0.07, 0.43)                  |
| Food | s/d Salsa                          | 0.06 (0.13) | 0 (0.00, 0.07)                     |
| Food | s/d String beans                   | 0.19 (0.18) | 0.14 (0.07, 0.14)                  |
| Food | s/d Sherbet or frozen yogurt       | 0.05 (0.15) | 0 (0.00, 0.07)                     |
| Food | s/d Shrimp, lobster, scallops      | 0.04 (0.06) | 0 (0.00, 0.07)                     |
| Food | s/d Skim milk                      | 0.74 (0.90) | 0.43 (0.00, 1.00)                  |
| Food | s/d Strawberries                   | 0.11 (0.18) | 0.07 (0.07, 0.14)                  |
| Food | s/d Beverages with sugar           | 0.23 (0.52) | 0.07 (0.00, 0.14)                  |

Supplementary Table 2. cont.

| <b>Type</b> | <b>Unit Exposure</b>       | <b>Mean (SD)</b> | <b>Median (25th and 75th percentiles)</b> |
|-------------|----------------------------|------------------|-------------------------------------------|
| Food        | s/d Sweet rolls            | 0.08 (0.13)      | 0.07 (0.00, 0.07)                         |
| Food        | s/d Tea                    | 0.58 (1.03)      | 0.07 (0.00, 0.79)                         |
| Food        | s/d Tofu or soybeans       | 0.01 (0.07)      | 0 (0.00, 0.00)                            |
| Food        | s/d Tomato juice or V-8    | 0.06 (0.17)      | 0 (0.00, 0.07)                            |
| Food        | s/d Tomatoes               | 0.40 (0.37)      | 0.43 (0.14, 0.43)                         |
| Food        | s/d Tomato sauce           | 0.15 (0.15)      | 0.14 (0.07, 0.14)                         |
| Food        | s/d Whole grains           | 0.11 (0.36)      | 0 (0.00, 0.07)                            |
| Food        | s/d White bread            | 0.56 (0.81)      | 0.14 (0.07, 0.79)                         |
| Food        | s/d Whole milk             | 0.15 (0.43)      | 0 (0.00, 0.07)                            |
| Food        | s/d White rice             | 0.11 (0.15)      | 0.07 (0.07, 0.14)                         |
| Food        | s/d White wine             | 0.18 (0.44)      | 0 (0.00, 0.14)                            |
| Food        | s/d Yams or sweet potatoes | 0.04 (0.06)      | 0 (0.00, 0.07)                            |
| Food        | s/d Yogurt                 | 0.12 (0.24)      | 0 (0.00, 0.14)                            |
| Food        | s/d Yellow squash          | 0.06 (0.10)      | 0.07 (0.00, 0.07)                         |

Supplementary Table 3: **EWAS Results.** All the exposures analyzed in our study, statistically significant or non-significant, are listed here. P-values are associated with two-sided Wald tests.

| Type     | Exposure                                 | Effect size | SE(effect size) | Hazard ratio | 95% CI       | P-value of PH | VIF  | P-value  | FDR   |
|----------|------------------------------------------|-------------|-----------------|--------------|--------------|---------------|------|----------|-------|
| Nutrient | Alcohol                                  | -0.13       | 0.02            | 0.88         | (0.84, 0.91) | 0.19          | 1.12 | 4.98E-11 | 0.000 |
| Nutrient | Added bran from wheat, rice, oat, corn   | -0.13       | 0.02            | 0.87         | (0.84, 0.91) | 0.1           | 1.22 | 5.56E-10 | 0.000 |
| Nutrient | Trans 16:1                               | 0.17        | 0.03            | 1.19         | (1.12, 1.25) | 0.41          | 2.15 | 9.59E-10 | 0.000 |
| Nutrient | Discretionary liquid fat                 | -0.15       | 0.02            | 0.86         | (0.82, 0.91) | 0.84          | 1.48 | 1.33E-09 | 0.000 |
| Nutrient | Animal MUFA                              | 0.16        | 0.03            | 1.17         | (1.11, 1.24) | 0.78          | 2.09 | 1.42E-08 | 0.001 |
| Nutrient | Discretionary solid fat                  | 0.17        | 0.03            | 1.18         | (1.11, 1.25) | 0.71          | 2.51 | 3.82E-08 | 0.001 |
| Food     | White wine                               | -0.12       | 0.02            | 0.89         | (0.85, 0.92) | 0.66          | 1.07 | 4.14E-08 | 0.001 |
| Nutrient | Palmitoleic acid                         | 0.16        | 0.03            | 1.17         | (1.11, 1.24) | 0.64          | 2.34 | 4.42E-08 | 0.001 |
| Nutrient | Animal fat                               | 0.16        | 0.03            | 1.17         | (1.10, 1.24) | 0.9           | 2.26 | 6.73E-08 | 0.001 |
| Food     | Salad/oil and vinegar dressing           | -0.1        | 0.02            | 0.9          | (0.87, 0.94) | 0.24          | 1.09 | 3.41E-07 | 0.001 |
| Food     | Yogurt                                   | -0.11       | 0.02            | 0.9          | (0.86, 0.94) | 0.09          | 1.07 | 1.37E-06 | 0.003 |
| Nutrient | Phytate                                  | -0.13       | 0.03            | 0.88         | (0.84, 0.93) | 0.02          | 1.96 | 4.01E-06 | 0.005 |
| Nutrient | Stearic acid                             | 0.15        | 0.03            | 1.16         | (1.09, 1.23) | 0.82          | 2.76 | 4.25E-06 | 0.005 |
| Nutrient | Carbohydrate from milled wholegrain      | -0.1        | 0.02            | 0.91         | (0.87, 0.95) | 0.29          | 1.29 | 5.03E-06 | 0.005 |
| Nutrient | Sodium                                   | 0.13        | 0.03            | 1.14         | (1.08, 1.21) | 0.13          | 2.28 | 5.11E-06 | 0.005 |
| Food     | Raw carrots                              | -0.09       | 0.02            | 0.91         | (0.87, 0.95) | 0.06          | 1.1  | 6.33E-06 | 0.005 |
| Nutrient | Total saturated fat                      | 0.15        | 0.03            | 1.16         | (1.08, 1.24) | 0.78          | 3.14 | 1.20E-05 | 0.007 |
| Nutrient | Hydroxyproline                           | 0.11        | 0.03            | 1.12         | (1.06, 1.17) | 0.25          | 1.64 | 1.26E-05 | 0.007 |
| Nutrient | Isorhamnetin                             | -0.09       | 0.02            | 0.91         | (0.87, 0.95) | 0.32          | 1.27 | 1.59E-05 | 0.007 |
| Food     | Liquor                                   | -0.08       | 0.02            | 0.92         | (0.89, 0.96) | 0.12          | 1.06 | 2.06E-05 | 0.009 |
| Nutrient | Carbohydrate from wholegrain             | -0.09       | 0.02            | 0.91         | (0.87, 0.95) | 0.22          | 1.28 | 2.46E-05 | 0.010 |
| Nutrient | Cereal fiber                             | -0.1        | 0.02            | 0.91         | (0.87, 0.95) | 0.2           | 1.49 | 4.04E-05 | 0.012 |
| Food     | Red wine                                 | -0.09       | 0.02            | 0.91         | (0.87, 0.95) | 0.63          | 1.04 | 4.28E-05 | 0.012 |
| Nutrient | Trans 18:2                               | 0.11        | 0.03            | 1.12         | (1.06, 1.18) | 0.19          | 1.83 | 4.48E-05 | 0.012 |
| Nutrient | Dietary tocopherols                      | -0.13       | 0.03            | 0.88         | (0.83, 0.94) | 0.75          | 2.78 | 5.71E-05 | 0.013 |
| Nutrient | Palmitic acid                            | 0.14        | 0.03            | 1.15         | (1.07, 1.23) | 0.93          | 3.37 | 7.01E-05 | 0.015 |
| Nutrient | Dietary folate                           | -0.11       | 0.03            | 0.9          | (0.85, 0.95) | 0.49          | 1.91 | 8.33E-05 | 0.016 |
| Food     | Doughnuts                                | 0.07        | 0.02            | 1.08         | (1.04, 1.12) | 0.1           | 1.1  | 9.84E-05 | 0.017 |
| Nutrient | Beta tocotrienol                         | -0.09       | 0.02            | 0.92         | (0.88, 0.96) | 0.43          | 1.31 | 1.07E-04 | 0.018 |
| Nutrient | Plant MUFA                               | -0.11       | 0.03            | 0.9          | (0.85, 0.95) | 0.8           | 2.05 | 1.22E-04 | 0.019 |
| Food     | Hotdog                                   | 0.07        | 0.02            | 1.07         | (1.04, 1.11) | 0.05          | 1.09 | 1.26E-04 | 0.019 |
| Food     | White bread                              | 0.07        | 0.02            | 1.08         | (1.04, 1.12) | 0.08          | 1.12 | 1.61E-04 | 0.022 |
| Nutrient | Natural germ                             | -0.08       | 0.02            | 0.92         | (0.88, 0.96) | 0.39          | 1.24 | 1.78E-04 | 0.022 |
| Nutrient | Apigenin                                 | -0.08       | 0.02            | 0.92         | (0.89, 0.96) | 0.81          | 1.15 | 1.79E-04 | 0.022 |
| Nutrient | Beta tocopherol                          | -0.1        | 0.03            | 0.91         | (0.86, 0.96) | 0.55          | 1.87 | 2.73E-04 | 0.028 |
| Nutrient | Natural bran                             | -0.08       | 0.02            | 0.92         | (0.89, 0.96) | 0.45          | 1.26 | 2.90E-04 | 0.028 |
| Nutrient | Supplemental selenium                    | -0.08       | 0.02            | 0.92         | (0.88, 0.96) | 0.89          | 1.38 | 4.01E-04 | 0.034 |
| Food     | Apple juice or cider                     | 0.07        | 0.02            | 1.07         | (1.03, 1.11) | 0.95          | 1.07 | 4.49E-04 | 0.036 |
| Nutrient | Dietary manganese                        | -0.09       | 0.03            | 0.91         | (0.86, 0.96) | 0.08          | 2    | 4.82E-04 | 0.037 |
| Food     | Peanuts                                  | -0.07       | 0.02            | 0.93         | (0.89, 0.97) | 0.09          | 1.08 | 4.92E-04 | 0.037 |
| Nutrient | Alpha tocotrienol                        | -0.08       | 0.02            | 0.92         | (0.88, 0.96) | 0.43          | 1.51 | 5.37E-04 | 0.037 |
| Nutrient | Myristic acid                            | 0.09        | 0.03            | 1.1          | (1.04, 1.15) | 0.59          | 1.99 | 5.44E-04 | 0.037 |
| Nutrient | Cholesterol                              | 0.09        | 0.03            | 1.1          | (1.04, 1.16) | 0.43          | 2    | 6.09E-04 | 0.039 |
| Nutrient | Supplemental or fortified folic acid     | -0.08       | 0.02            | 0.92         | (0.88, 0.97) | 0.53          | 1.55 | 6.63E-04 | 0.040 |
| Food     | All processed meats                      | 0.07        | 0.02            | 1.07         | (1.03, 1.11) | 0.23          | 1.14 | 6.73E-04 | 0.040 |
| Nutrient | Trans 18:1                               | 0.09        | 0.03            | 1.09         | (1.04, 1.15) | 0.62          | 1.93 | 6.94E-04 | 0.040 |
| Nutrient | Total manganese                          | -0.08       | 0.02            | 0.92         | (0.88, 0.97) | 0.99          | 1.59 | 8.72E-04 | 0.046 |
| Food     | Hamburger                                | 0.07        | 0.02            | 1.07         | (1.03, 1.11) | 0.09          | 1.18 | 9.53E-04 | 0.047 |
| Food     | Beverages with sugar                     | 0.07        | 0.02            | 1.07         | (1.03, 1.11) | 0.86          | 1.13 | 9.70E-04 | 0.047 |
| Nutrient | Synthetic vitamin B6                     | -0.07       | 0.02            | 0.94         | (0.90, 0.97) | 0.66          | 1.07 | 1.02E-03 | 0.047 |
| Food     | Cold breakfast cereal                    | -0.07       | 0.02            | 0.94         | (0.90, 0.97) | 0.13          | 1.1  | 1.02E-03 | 0.047 |
| Food     | Raisins or grapes                        | -0.07       | 0.02            | 0.93         | (0.90, 0.97) | 0.91          | 1.11 | 1.09E-03 | 0.048 |
| Nutrient | Heme iron                                | 0.08        | 0.02            | 1.08         | (1.03, 1.14) | 0.51          | 1.55 | 1.17E-03 | 0.050 |
| Nutrient | Food supplemented alpha tocopherol       | -0.06       | 0.02            | 0.94         | (0.90, 0.98) | 0.43          | 1.09 | 1.54E-03 | 0.058 |
| Food     | Cookies                                  | -0.07       | 0.02            | 0.94         | (0.90, 0.98) | 0.93          | 1.21 | 1.55E-03 | 0.058 |
| Nutrient | Total trans fat                          | 0.08        | 0.03            | 1.09         | (1.03, 1.15) | 0.54          | 1.99 | 2.05E-03 | 0.069 |
| Food     | Beef or lamb as a main dish              | 0.06        | 0.02            | 1.07         | (1.02, 1.11) | 0.49          | 1.21 | 2.10E-03 | 0.069 |
| Nutrient | Total magnesium                          | -0.09       | 0.03            | 0.91         | (0.86, 0.97) | 1             | 2.43 | 3.24E-03 | 0.090 |
| Food     | Dark meat fish                           | -0.06       | 0.02            | 0.94         | (0.90, 0.98) | 0.14          | 1.05 | 3.32E-03 | 0.090 |
| Nutrient | Dietary choline from phosphatidylcholine | 0.08        | 0.03            | 1.09         | (1.03, 1.15) | 0.74          | 2.23 | 3.40E-03 | 0.090 |

Supplementary Table 3. cont.

| Type     | Exposure                              | Effect size | SE(effect size) | Hazard ratio | 95% CI       | P-value of PH | VIF  | P-value  | FDR   |
|----------|---------------------------------------|-------------|-----------------|--------------|--------------|---------------|------|----------|-------|
| Food     | Broccoli                              | -0.06       | 0.02            | 0.94         | (0.91, 0.98) | 0.08          | 1.07 | 3.69E-03 | 0.093 |
| Nutrient | Vegetable protein                     | -0.1        | 0.03            | 0.91         | (0.85, 0.97) | 0.07          | 3.14 | 3.72E-03 | 0.093 |
| Nutrient | Total flavones                        | -0.06       | 0.02            | 0.94         | (0.90, 0.98) | 0.63          | 1.23 | 3.81E-03 | 0.093 |
| Nutrient | Choline from sphingomyelin            | 0.08        | 0.03            | 1.08         | (1.02, 1.14) | 0.5           | 1.92 | 4.14E-03 | 0.095 |
| Food     | Romaine or leaf lettuce               | -0.06       | 0.02            | 0.94         | (0.91, 0.98) | 0.28          | 1.08 | 4.18E-03 | 0.095 |
| Nutrient | Glucoraphanin                         | -0.06       | 0.02            | 0.95         | (0.91, 0.98) | 0.07          | 1.07 | 4.27E-03 | 0.095 |
| Nutrient | Total vitamin E                       | -0.07       | 0.02            | 0.93         | (0.89, 0.98) | 0.54          | 1.68 | 4.36E-03 | 0.095 |
| Food     | Other nuts                            | -0.06       | 0.02            | 0.94         | (0.90, 0.98) | 0.31          | 1.1  | 4.48E-03 | 0.095 |
| Food     | Olive oil                             | -0.06       | 0.02            | 0.94         | (0.91, 0.98) | 0.57          | 1.05 | 4.55E-03 | 0.095 |
| Nutrient | Eicosenoic acid                       | -0.06       | 0.02            | 0.94         | (0.90, 0.98) | 0.4           | 1.35 | 4.56E-03 | 0.095 |
| Nutrient | Dietary magnesium                     | -0.09       | 0.03            | 0.91         | (0.86, 0.97) | 0.58          | 2.81 | 4.75E-03 | 0.096 |
| Nutrient | Fiber from legumes                    | -0.06       | 0.02            | 0.94         | (0.90, 0.98) | 0.15          | 1.26 | 4.98E-03 | 0.098 |
| Nutrient | Vegetable fat                         | -0.08       | 0.03            | 0.92         | (0.87, 0.98) | 0.54          | 2.34 | 5.18E-03 | 0.099 |
| Nutrient | Total fiber                           | -0.08       | 0.03            | 0.93         | (0.88, 0.98) | 0.03          | 2.07 | 5.55E-03 | 0.103 |
| Food     | Pie                                   | 0.05        | 0.02            | 1.06         | (1.01, 1.10) | 0.39          | 1.17 | 6.94E-03 | 0.119 |
| Food     | Plain water                           | 0.05        | 0.02            | 1.05         | (1.01, 1.10) | 0.75          | 1.06 | 7.93E-03 | 0.129 |
| Nutrient | Neoglucobrassicin                     | -0.05       | 0.02            | 0.95         | (0.91, 0.99) | 0.06          | 1.07 | 8.27E-03 | 0.131 |
| Nutrient | Total isoflavones                     | -0.06       | 0.02            | 0.95         | (0.91, 0.99) | 0.58          | 1.14 | 8.57E-03 | 0.133 |
| Food     | String beans                          | 0.05        | 0.02            | 1.05         | (1.01, 1.09) | 0.11          | 1.08 | 8.83E-03 | 0.134 |
| Nutrient | Dietary alpha tocopherol              | -0.08       | 0.03            | 0.93         | (0.87, 0.98) | 0.7           | 2.39 | 9.83E-03 | 0.143 |
| Food     | Whole grains                          | -0.05       | 0.02            | 0.95         | (0.91, 0.99) | 0.27          | 1.08 | 1.03E-02 | 0.146 |
| Nutrient | Supplemental iodine                   | -0.06       | 0.02            | 0.95         | (0.90, 0.99) | 0.42          | 1.39 | 1.16E-02 | 0.157 |
| Nutrient | Quercetin                             | -0.05       | 0.02            | 0.95         | (0.91, 0.99) | 0.68          | 1.27 | 1.22E-02 | 0.161 |
| Nutrient | Hesperetin                            | -0.05       | 0.02            | 0.95         | (0.92, 0.99) | 0.62          | 1.13 | 1.31E-02 | 0.167 |
| Nutrient | Glucobarbarin                         | -0.05       | 0.02            | 0.95         | (0.91, 0.99) | 0.11          | 1.06 | 1.43E-02 | 0.177 |
| Food     | Wholegrain bread                      | -0.05       | 0.02            | 0.95         | (0.92, 0.99) | 0.73          | 1.11 | 1.70E-02 | 0.198 |
| Nutrient | Glucobrassicinapin                    | -0.05       | 0.02            | 0.95         | (0.92, 0.99) | 0.03          | 1.07 | 1.72E-02 | 0.198 |
| Nutrient | Total calcium                         | -0.05       | 0.02            | 0.95         | (0.91, 0.99) | 0.14          | 1.39 | 1.77E-02 | 0.200 |
| Nutrient | Carbohydrate from intact wholegrain   | -0.05       | 0.02            | 0.95         | (0.91, 0.99) | 0.2           | 1.13 | 1.84E-02 | 0.204 |
| Nutrient | Total beta carotene                   | -0.05       | 0.02            | 0.95         | (0.91, 0.99) | 0.01          | 1.29 | 1.89E-02 | 0.205 |
| Food     | Ketchup or red chili sauce            | -0.05       | 0.02            | 0.95         | (0.91, 0.99) | 0.7           | 1.11 | 1.92E-02 | 0.205 |
| Nutrient | Proanthocyanidin, 7-10mers            | -0.05       | 0.02            | 0.95         | (0.91, 0.99) | 0.97          | 1.28 | 2.00E-02 | 0.207 |
| Nutrient | Total furocoumarins                   | -0.05       | 0.02            | 0.96         | (0.92, 0.99) | 0.25          | 1.06 | 2.03E-02 | 0.207 |
| Food     | Cream cheese                          | 0.04        | 0.02            | 1.04         | (1.01, 1.08) | 0.99          | 1.05 | 2.04E-02 | 0.207 |
| Nutrient | Dietary long chain fatty acid         | -0.05       | 0.02            | 0.95         | (0.92, 0.99) | 0.31          | 1.11 | 2.12E-02 | 0.210 |
| Nutrient | Total flavanones                      | -0.05       | 0.02            | 0.95         | (0.92, 0.99) | 0.97          | 1.14 | 2.15E-02 | 0.210 |
| Nutrient | Total dietary omega 3 (no alpha 18:3) | -0.05       | 0.02            | 0.95         | (0.92, 0.99) | 0.27          | 1.11 | 2.16E-02 | 0.210 |
| Nutrient | Crude fiber                           | -0.06       | 0.03            | 0.94         | (0.89, 0.99) | 0.05          | 1.9  | 2.23E-02 | 0.211 |
| Nutrient | Dairy fat                             | 0.05        | 0.02            | 1.06         | (1.01, 1.11) | 0.55          | 1.62 | 2.24E-02 | 0.211 |
| Nutrient | Total fat                             | 0.09        | 0.04            | 1.09         | (1.01, 1.18) | 0.95          | 4.21 | 2.26E-02 | 0.211 |
| Nutrient | Dihydrovitamin K                      | 0.06        | 0.02            | 1.06         | (1.01, 1.11) | 0.77          | 1.65 | 2.32E-02 | 0.211 |
| Nutrient | 6'7'-Dihydroxybergamottin             | -0.04       | 0.02            | 0.96         | (0.92, 0.99) | 0.24          | 1.06 | 2.33E-02 | 0.211 |
| Nutrient | Total vitamin A                       | -0.05       | 0.02            | 0.95         | (0.91, 0.99) | 0.08          | 1.36 | 2.37E-02 | 0.212 |
| Nutrient | Maltose                               | 0.06        | 0.03            | 1.06         | (1.01, 1.11) | 0.89          | 1.82 | 2.45E-02 | 0.212 |
| Food     | Beef/pork/lamb as a sandwich          | 0.05        | 0.02            | 1.05         | (1.01, 1.09) | 0.82          | 1.22 | 2.46E-02 | 0.212 |
| Food     | Cooked oatmeal/oatbran                | -0.05       | 0.02            | 0.96         | (0.92, 0.99) | 0.65          | 1.1  | 2.47E-02 | 0.212 |
| Nutrient | Total flavonols                       | -0.05       | 0.02            | 0.95         | (0.91, 0.99) | 0.68          | 1.22 | 2.51E-02 | 0.213 |
| Nutrient | Genistein                             | -0.05       | 0.02            | 0.95         | (0.91, 0.99) | 0.4           | 1.1  | 2.59E-02 | 0.216 |
| Food     | Avocado                               | -0.05       | 0.02            | 0.95         | (0.92, 0.99) | 0.64          | 1.03 | 2.74E-02 | 0.223 |
| Food     | Chicken or turkey, with skin          | 0.04        | 0.02            | 1.05         | (1.00, 1.09) | 0.34          | 1.08 | 2.82E-02 | 0.225 |
| Nutrient | Proanthocyanidin, 4-6mers             | -0.05       | 0.02            | 0.95         | (0.91, 0.99) | 0.84          | 1.34 | 2.84E-02 | 0.225 |
| Nutrient | Oxalate                               | -0.05       | 0.02            | 0.95         | (0.91, 1.00) | 0.22          | 1.39 | 3.07E-02 | 0.236 |
| Food     | Muffins or biscuits                   | 0.04        | 0.02            | 1.04         | (1.00, 1.08) | 0.69          | 1.09 | 3.16E-02 | 0.239 |
| Nutrient | Bergamottin                           | -0.04       | 0.02            | 0.96         | (0.92, 1.00) | 0.23          | 1.06 | 3.23E-02 | 0.241 |
| Nutrient | Naringenin                            | -0.04       | 0.02            | 0.96         | (0.92, 1.00) | 0.5           | 1.12 | 3.32E-02 | 0.244 |
| Nutrient | Proanthocyanidin, polymers            | -0.05       | 0.02            | 0.96         | (0.92, 1.00) | 0.62          | 1.27 | 3.48E-02 | 0.249 |
| Nutrient | Malvidin                              | -0.04       | 0.02            | 0.96         | (0.92, 1.00) | 0.18          | 1.12 | 3.48E-02 | 0.249 |
| Nutrient | Total vitamin B12                     | -0.05       | 0.02            | 0.95         | (0.91, 1.00) | 0.04          | 1.37 | 3.62E-02 | 0.252 |
| Nutrient | Capric acid                           | 0.05        | 0.02            | 1.05         | (1.00, 1.10) | 0.27          | 1.64 | 3.63E-02 | 0.252 |
| Nutrient | Dietary vitamin D                     | -0.05       | 0.02            | 0.95         | (0.91, 1.00) | 0.03          | 1.35 | 3.73E-02 | 0.254 |

Supplementary Table 3. cont.

| Type     | Exposure                                       | Effect size | SE(effect size) | Hazard ratio | 95% CI       | P-value of PH | VIF  | P-value  | FDR   |
|----------|------------------------------------------------|-------------|-----------------|--------------|--------------|---------------|------|----------|-------|
| Nutrient | Dietary iron                                   | -0.06       | 0.03            | 0.94         | (0.89, 1.00) | 0.08          | 2.14 | 3.75E-02 | 0.254 |
| Food     | Tofu or soybeans                               | -0.05       | 0.02            | 0.95         | (0.91, 1.00) | 0.09          | 1.04 | 4.11E-02 | 0.268 |
| Nutrient | Gamma tocopherol                               | -0.06       | 0.03            | 0.94         | (0.89, 1.00) | 0.77          | 2.25 | 4.12E-02 | 0.268 |
| Nutrient | Glycitein                                      | -0.05       | 0.02            | 0.96         | (0.91, 1.00) | 0.08          | 1.05 | 4.19E-02 | 0.269 |
| Food     | Prune                                          | -0.04       | 0.02            | 0.96         | (0.93, 1.00) | 0.41          | 1.05 | 4.21E-02 | 0.269 |
| Nutrient | Animal protein                                 | 0.06        | 0.03            | 1.06         | (1.00, 1.12) | 0.77          | 2.15 | 4.40E-02 | 0.275 |
| Food     | Punch                                          | 0.04        | 0.02            | 1.04         | (1.00, 1.08) | 0.47          | 1.08 | 4.48E-02 | 0.275 |
| Nutrient | Glucocheirolin                                 | 0.04        | 0.02            | 1.04         | (1.00, 1.08) | 0.04          | 1.02 | 4.51E-02 | 0.275 |
| Nutrient | Epiprogoitrin                                  | -0.04       | 0.02            | 0.96         | (0.92, 1.00) | 0.21          | 1.05 | 4.59E-02 | 0.275 |
| Food     | Pork as a main dish                            | 0.04        | 0.02            | 1.04         | (1.00, 1.08) | 0.02          | 1.1  | 4.60E-02 | 0.275 |
| Nutrient | Isoflavones (no biochanin A or formononetin)   | -0.04       | 0.02            | 0.96         | (0.92, 1.00) | 0.54          | 1.11 | 4.65E-02 | 0.275 |
| Nutrient | Luteolin                                       | -0.04       | 0.02            | 0.96         | (0.92, 1.00) | 0.83          | 1.2  | 4.85E-02 | 0.277 |
| Food     | Brussels sprouts                               | 0.04        | 0.02            | 1.04         | (1.00, 1.07) | 0.04          | 1.02 | 4.86E-02 | 0.277 |
| Nutrient | Dietary thiamine                               | -0.07       | 0.03            | 0.93         | (0.87, 1.00) | 0.25          | 3.17 | 4.87E-02 | 0.277 |
| Nutrient | Caproic acid                                   | 0.04        | 0.02            | 1.05         | (1.00, 1.09) | 0.33          | 1.45 | 4.89E-02 | 0.277 |
| Food     | Candy bar                                      | 0.04        | 0.02            | 1.04         | (1.00, 1.08) | 0.68          | 1.08 | 5.16E-02 | 0.285 |
| Nutrient | Total free choline                             | -0.06       | 0.03            | 0.94         | (0.89, 1.00) | 0.89          | 2.25 | 5.20E-02 | 0.285 |
| Food     | Apple and pear                                 | -0.04       | 0.02            | 0.96         | (0.92, 1.00) | 0.6           | 1.1  | 5.24E-02 | 0.285 |
| Nutrient | Sinigrin                                       | 0.04        | 0.02            | 1.04         | (1.00, 1.08) | 0.02          | 1.07 | 5.33E-02 | 0.285 |
| Food     | Tomato juice or V-8                            | 0.03        | 0.02            | 1.04         | (1.00, 1.07) | 0.43          | 1.04 | 5.34E-02 | 0.285 |
| Nutrient | Total phosphorous                              | -0.07       | 0.03            | 0.94         | (0.87, 1.00) | 0.67          | 3.35 | 5.39E-02 | 0.285 |
| Food     | Pasta                                          | -0.04       | 0.02            | 0.96         | (0.92, 1.00) | 0.59          | 1.16 | 5.85E-02 | 0.299 |
| Food     | Canned tuna                                    | -0.04       | 0.02            | 0.96         | (0.92, 1.00) | 0.1           | 1.07 | 5.91E-02 | 0.299 |
| Nutrient | Daidzein                                       | -0.04       | 0.02            | 0.96         | (0.92, 1.00) | 0.41          | 1.07 | 5.91E-02 | 0.299 |
| Nutrient | Menaquinone vitamin K2 (4 isoprenoid residues) | 0.04        | 0.02            | 1.04         | (1.00, 1.09) | 0.1           | 1.45 | 6.02E-02 | 0.301 |
| Food     | Corn                                           | 0.04        | 0.02            | 1.04         | (1.00, 1.08) | 0.88          | 1.11 | 6.30E-02 | 0.309 |
| Nutrient | Glucosylsin                                    | -0.04       | 0.02            | 0.96         | (0.93, 1.00) | 0.04          | 1.07 | 6.47E-02 | 0.313 |
| Nutrient | Choline derivative betaine                     | -0.05       | 0.03            | 0.95         | (0.91, 1.00) | 0.08          | 1.76 | 6.61E-02 | 0.316 |
| Nutrient | Total long chain fatty acid                    | -0.04       | 0.02            | 0.96         | (0.93, 1.00) | 0.74          | 1.11 | 6.66E-02 | 0.316 |
| Nutrient | Linoleic acid                                  | -0.06       | 0.03            | 0.95         | (0.89, 1.00) | 0.93          | 2.55 | 6.72E-02 | 0.316 |
| Nutrient | Total polyunsaturated fat                      | -0.06       | 0.03            | 0.94         | (0.89, 1.00) | 0.92          | 2.72 | 6.89E-02 | 0.316 |
| Nutrient | Protein                                        | -0.05       | 0.03            | 0.95         | (0.91, 1.00) | 0.01          | 1.99 | 6.90E-02 | 0.316 |
| Nutrient | Omega 3 (20:5+22:6, no alpha 18:3)             | -0.04       | 0.02            | 0.96         | (0.93, 1.00) | 0.7           | 1.11 | 7.01E-02 | 0.316 |
| Nutrient | Dietary choline                                | 0.06        | 0.03            | 1.06         | (0.99, 1.14) | 0.65          | 3.2  | 7.02E-02 | 0.316 |
| Nutrient | Total vitamin C                                | -0.04       | 0.02            | 0.96         | (0.92, 1.00) | 0.83          | 1.29 | 7.05E-02 | 0.320 |
| Nutrient | Gluconapin                                     | 0.03        | 0.02            | 1.03         | (1.00, 1.07) | 0.02          | 1.04 | 7.21E-02 | 0.325 |
| Nutrient | Proanthocyanidin, dimers                       | -0.04       | 0.02            | 0.96         | (0.92, 1.00) | 0.89          | 1.24 | 7.43E-02 | 0.325 |
| Food     | Coffee                                         | -0.03       | 0.02            | 0.97         | (0.93, 1.00) | 0.56          | 1.04 | 7.53E-02 | 0.325 |
| Nutrient | Dietary betaine                                | -0.05       | 0.03            | 0.96         | (0.91, 1.00) | 0.08          | 1.77 | 7.61E-02 | 0.325 |
| Nutrient | Total iron                                     | -0.04       | 0.02            | 0.96         | (0.91, 1.00) | 0.6           | 1.44 | 7.64E-02 | 0.330 |
| Nutrient | Added germ from wheat                          | -0.04       | 0.02            | 0.96         | (0.93, 1.00) | 0.9           | 1.06 | 7.86E-02 | 0.336 |
| Nutrient | Total pyridoxine                               | -0.04       | 0.02            | 0.96         | (0.92, 1.00) | 0.22          | 1.37 | 8.11E-02 | 0.339 |
| Food     | Low caff beverages                             | -0.04       | 0.02            | 0.96         | (0.93, 1.00) | 0             | 1.1  | 8.29E-02 | 0.340 |
| Nutrient | Choline from phosphatidylcholine               | 0.05        | 0.03            | 1.05         | (0.99, 1.10) | 0.95          | 1.96 | 8.39E-02 | 0.342 |
| Nutrient | Total zinc                                     | -0.04       | 0.02            | 0.96         | (0.92, 1.01) | 0.37          | 1.5  | 8.50E-02 | 0.345 |
| Nutrient | Dietary niacin                                 | -0.05       | 0.03            | 0.95         | (0.89, 1.01) | 0.34          | 2.72 | 8.68E-02 | 0.357 |
| Nutrient | Nitrate                                        | -0.04       | 0.02            | 0.96         | (0.93, 1.01) | 0.03          | 1.22 | 9.20E-02 | 0.357 |
| Nutrient | Acrylamide                                     | -0.04       | 0.02            | 0.96         | (0.92, 1.01) | 0.76          | 1.41 | 9.21E-02 | 0.364 |
| Nutrient | Dietary riboflavin                             | -0.05       | 0.03            | 0.95         | (0.90, 1.01) | 0.21          | 2.41 | 9.57E-02 | 0.364 |
| Nutrient | Dietary phosphorous                            | -0.06       | 0.03            | 0.94         | (0.88, 1.01) | 0.67          | 3.39 | 9.63E-02 | 0.370 |
| Nutrient | Bergaptol                                      | -0.03       | 0.02            | 0.97         | (0.93, 1.01) | 0.22          | 1.05 | 9.93E-02 | 0.372 |
| Nutrient | Butyric acid                                   | 0.04        | 0.02            | 1.04         | (0.99, 1.09) | 0.49          | 1.53 | 1.01E-01 | 0.372 |
| Nutrient | Dietary pyridoxine                             | -0.05       | 0.03            | 0.95         | (0.90, 1.01) | 0.49          | 2.32 | 1.02E-01 | 0.372 |
| Nutrient | Glycine                                        | 0.05        | 0.03            | 1.06         | (0.99, 1.13) | 0.46          | 2.93 | 1.02E-01 | 0.379 |
| Nutrient | Dietary vitamin A                              | -0.04       | 0.02            | 0.96         | (0.92, 1.01) | 0.06          | 1.36 | 1.06E-01 | 0.381 |
| Food     | Orange juice                                   | -0.03       | 0.02            | 0.97         | (0.93, 1.01) | 0.71          | 1.08 | 1.07E-01 | 0.381 |
| Nutrient | Added sugar                                    | 0.04        | 0.03            | 1.04         | (0.99, 1.09) | 1             | 1.74 | 1.08E-01 | 0.381 |
| Food     | Peas, or lima beans                            | 0.03        | 0.02            | 1.03         | (0.99, 1.07) | 0.48          | 1.11 | 1.09E-01 | 0.398 |
| Food     | Bacon                                          | 0.03        | 0.02            | 1.03         | (0.99, 1.07) | 0.21          | 1.09 | 1.16E-01 | 0.398 |
| Nutrient | Proanthocyanidin, trimers                      | -0.04       | 0.02            | 0.96         | (0.92, 1.01) | 0.72          | 1.44 | 1.17E-01 | 0.400 |

Supplementary Table 3. cont.

| Type     | Exposure                             | Effect size | SE(effect size) | Hazard ratio | 95% CI       | P-value of PH | VIF  | P-value  | FDR   |
|----------|--------------------------------------|-------------|-----------------|--------------|--------------|---------------|------|----------|-------|
| Nutrient | DHA fatty acid                       | -0.03       | 0.02            | 0.97         | (0.93, 1.01) | 0.47          | 1.11 | 1.19E-01 | 0.400 |
| Food     | Jams, jellies                        | -0.03       | 0.02            | 0.97         | (0.93, 1.01) | 0.89          | 1.15 | 1.20E-01 | 0.400 |
| Food     | Mayo                                 | -0.03       | 0.02            | 0.97         | (0.93, 1.01) | 0.7           | 1.15 | 1.21E-01 | 0.400 |
| Nutrient | Total vitamin D                      | -0.04       | 0.02            | 0.96         | (0.92, 1.01) | 0.12          | 1.49 | 1.21E-01 | 0.403 |
| Nutrient | EPA fatty acid                       | -0.03       | 0.02            | 0.97         | (0.93, 1.01) | 0.86          | 1.08 | 1.23E-01 | 0.405 |
| Nutrient | Alpha carotene                       | -0.03       | 0.02            | 0.97         | (0.93, 1.01) | 0.08          | 1.2  | 1.26E-01 | 0.405 |
| Nutrient | Histidine                            | 0.05        | 0.03            | 1.05         | (0.99, 1.13) | 0.55          | 3.28 | 1.26E-01 | 0.405 |
| Food     | Other cheese                         | -0.03       | 0.02            | 0.97         | (0.93, 1.01) | 0.69          | 1.13 | 1.27E-01 | 0.409 |
| Nutrient | Arachadonic acid                     | 0.04        | 0.02            | 1.04         | (0.99, 1.09) | 0.44          | 1.51 | 1.30E-01 | 0.409 |
| Food     | Tomatoes                             | -0.03       | 0.02            | 0.97         | (0.93, 1.01) | 0.12          | 1.08 | 1.30E-01 | 0.411 |
| Nutrient | Sulfur from methionine               | 0.05        | 0.03            | 1.05         | (0.99, 1.11) | 0.84          | 2.66 | 1.32E-01 | 0.411 |
| Food     | Sherbet or frozen yogurt             | -0.03       | 0.02            | 0.97         | (0.93, 1.01) | 0.01          | 1.08 | 1.33E-01 | 0.411 |
| Nutrient | Threonine                            | 0.05        | 0.03            | 1.05         | (0.98, 1.12) | 0.72          | 3.18 | 1.34E-01 | 0.414 |
| Food     | Skim milk                            | -0.03       | 0.02            | 0.97         | (0.93, 1.01) | 0.59          | 1.07 | 1.36E-01 | 0.414 |
| Food     | Candy without chocolate              | -0.03       | 0.02            | 0.97         | (0.94, 1.01) | 0.64          | 1.06 | 1.37E-01 | 0.434 |
| Nutrient | Fruit carbohydrate minus juice sugar | -0.03       | 0.02            | 0.97         | (0.93, 1.01) | 0.92          | 1.34 | 1.47E-01 | 0.434 |
| Food     | Beef liver                           | 0.03        | 0.02            | 1.03         | (0.99, 1.07) | 0.51          | 1.02 | 1.48E-01 | 0.436 |
| Nutrient | Total folate                         | -0.03       | 0.02            | 0.97         | (0.92, 1.01) | 0.1           | 1.48 | 1.51E-01 | 0.436 |
| Nutrient | Total copper                         | -0.04       | 0.03            | 0.96         | (0.92, 1.01) | 0.85          | 1.71 | 1.52E-01 | 0.436 |
| Food     | Raw spinach                          | -0.03       | 0.02            | 0.97         | (0.93, 1.01) | 0.07          | 1.06 | 1.52E-01 | 0.436 |
| Nutrient | Dietary beta carotene                | -0.03       | 0.02            | 0.97         | (0.93, 1.01) | 0.02          | 1.29 | 1.53E-01 | 0.436 |
| Nutrient | Caprylic acid                        | 0.03        | 0.02            | 1.03         | (0.99, 1.08) | 0.1           | 1.44 | 1.54E-01 | 0.436 |
| Nutrient | Alanine                              | 0.05        | 0.03            | 1.05         | (0.98, 1.12) | 0.62          | 2.92 | 1.55E-01 | 0.436 |
| Nutrient | Proanthocyanidin, monomers           | -0.03       | 0.02            | 0.97         | (0.93, 1.01) | 0.89          | 1.12 | 1.56E-01 | 0.445 |
| Food     | Whole milk                           | 0.03        | 0.02            | 1.03         | (0.99, 1.06) | 0.82          | 1.04 | 1.62E-01 | 0.447 |
| Nutrient | Dietary potassium                    | -0.05       | 0.03            | 0.96         | (0.90, 1.02) | 0.91          | 2.96 | 1.64E-01 | 0.449 |
| Food     | French fried potatoes                | 0.03        | 0.02            | 1.03         | (0.99, 1.07) | 0.96          | 1.15 | 1.66E-01 | 0.449 |
| Food     | Celery                               | -0.03       | 0.02            | 0.97         | (0.94, 1.01) | 0.33          | 1.08 | 1.69E-01 | 0.449 |
| Nutrient | Lysine                               | 0.04        | 0.03            | 1.04         | (0.98, 1.11) | 0.88          | 2.72 | 1.69E-01 | 0.449 |
| Nutrient | Dietary free choline                 | -0.04       | 0.03            | 0.96         | (0.90, 1.02) | 0.81          | 2.63 | 1.71E-01 | 0.449 |
| Food     | Green/red peppers                    | -0.03       | 0.02            | 0.97         | (0.94, 1.01) | 0.98          | 1.05 | 1.71E-01 | 0.449 |
| Nutrient | Lactose                              | -0.03       | 0.02            | 0.97         | (0.93, 1.01) | 0.11          | 1.23 | 1.72E-01 | 0.449 |
| Nutrient | Total anthocyanidins                 | -0.03       | 0.02            | 0.97         | (0.93, 1.01) | 0.51          | 1.17 | 1.72E-01 | 0.451 |
| Nutrient | Fruit fiber                          | -0.03       | 0.02            | 0.97         | (0.93, 1.01) | 0.54          | 1.28 | 1.76E-01 | 0.451 |
| Nutrient | Total MUFA                           | 0.05        | 0.04            | 1.05         | (0.98, 1.13) | 1             | 3.49 | 1.76E-01 | 0.453 |
| Food     | Iceberg or head lettuce              | -0.03       | 0.02            | 0.97         | (0.94, 1.01) | 0.33          | 1.06 | 1.78E-01 | 0.465 |
| Nutrient | Pantothenic acid                     | -0.03       | 0.02            | 0.97         | (0.93, 1.02) | 0.26          | 1.51 | 1.86E-01 | 0.465 |
| Food     | Mixed vegetables                     | 0.03        | 0.02            | 1.03         | (0.99, 1.07) | 0             | 1.08 | 1.87E-01 | 0.477 |
| Nutrient | Methionine                           | 0.04        | 0.03            | 1.04         | (0.98, 1.11) | 0.86          | 2.92 | 1.94E-01 | 0.477 |
| Nutrient | Peonidin                             | -0.03       | 0.02            | 0.97         | (0.94, 1.01) | 0.26          | 1.11 | 1.95E-01 | 0.478 |
| Nutrient | Beta cryptoxanthin                   | -0.03       | 0.02            | 0.97         | (0.93, 1.01) | 0.74          | 1.27 | 1.97E-01 | 0.478 |
| Nutrient | Tryptophan                           | 0.05        | 0.04            | 1.05         | (0.98, 1.12) | 0.63          | 3.56 | 1.98E-01 | 0.501 |
| Nutrient | Glycosolated B6                      | -0.03       | 0.03            | 0.97         | (0.92, 1.02) | 0.06          | 1.73 | 2.13E-01 | 0.501 |
| Nutrient | Dietary omega 6 (no gamma 18:3)      | -0.04       | 0.03            | 0.96         | (0.91, 1.02) | 0.34          | 2.5  | 2.13E-01 | 0.506 |
| Food     | Other fruit juices                   | 0.02        | 0.02            | 1.02         | (0.99, 1.06) | 0.74          | 1.08 | 2.18E-01 | 0.506 |
| Nutrient | Dietary calcium                      | -0.03       | 0.03            | 0.97         | (0.92, 1.02) | 0.19          | 1.8  | 2.19E-01 | 0.527 |
| Food     | Peanut butter                        | -0.02       | 0.02            | 0.98         | (0.94, 1.02) | 0.12          | 1.09 | 2.32E-01 | 0.532 |
| Nutrient | Myricetin                            | -0.02       | 0.02            | 0.98         | (0.94, 1.02) | 0.67          | 1.1  | 2.36E-01 | 0.539 |
| Nutrient | Progoitrin                           | 0.02        | 0.02            | 1.02         | (0.98, 1.06) | 0.02          | 1.05 | 2.42E-01 | 0.540 |
| Food     | Cabbage                              | 0.02        | 0.02            | 1.02         | (0.98, 1.06) | 0.69          | 1.08 | 2.44E-01 | 0.545 |
| Nutrient | Dairy calcium                        | -0.03       | 0.02            | 0.97         | (0.93, 1.02) | 0.22          | 1.37 | 2.50E-01 | 0.545 |
| Nutrient | Formononetin                         | -0.02       | 0.02            | 0.98         | (0.94, 1.02) | 0.73          | 1.12 | 2.50E-01 | 0.546 |
| Nutrient | Dietary sulfur                       | 0.04        | 0.04            | 1.04         | (0.97, 1.12) | 0.98          | 3.88 | 2.53E-01 | 0.546 |
| Nutrient | Thearubigins                         | -0.02       | 0.02            | 0.98         | (0.94, 1.02) | 0.88          | 1.03 | 2.53E-01 | 0.547 |
| Food     | Butter                               | 0.02        | 0.02            | 1.02         | (0.98, 1.06) | 0.24          | 1.04 | 2.57E-01 | 0.547 |
| Nutrient | Lauric acid                          | 0.02        | 0.02            | 1.03         | (0.98, 1.07) | 0.03          | 1.39 | 2.57E-01 | 0.550 |
| Food     | Yellow squash                        | 0.02        | 0.02            | 1.02         | (0.98, 1.06) | 0.03          | 1.04 | 2.60E-01 | 0.555 |
| Food     | White rice                           | -0.02       | 0.02            | 0.98         | (0.94, 1.02) | 0.06          | 1.13 | 2.65E-01 | 0.562 |
| Nutrient | Isoleucine                           | 0.04        | 0.03            | 1.04         | (0.97, 1.11) | 0.86          | 3.17 | 2.71E-01 | 0.562 |
| Nutrient | Pelargonidin                         | -0.02       | 0.02            | 0.98         | (0.94, 1.02) | 0.66          | 1.09 | 2.72E-01 | 0.566 |

Supplementary Table 3. cont.

| Type     | Exposure                                         | Effect size | SE(effect size) | Hazard ratio | 95% CI       | P-value of PH | VIF  | P-value  | FDR   |
|----------|--------------------------------------------------|-------------|-----------------|--------------|--------------|---------------|------|----------|-------|
| Nutrient | Petunidin                                        | -0.02       | 0.02            | 0.98         | (0.94, 1.02) | 0.48          | 1.1  | 2.76E-01 | 0.571 |
| Food     | Popcorn                                          | -0.02       | 0.02            | 0.98         | (0.94, 1.02) | 0.25          | 1.07 | 2.82E-01 | 0.571 |
| Nutrient | Total riboflavin                                 | -0.02       | 0.02            | 0.98         | (0.93, 1.02) | 0.11          | 1.41 | 2.84E-01 | 0.571 |
| Nutrient | Oleic acid                                       | 0.04        | 0.04            | 1.04         | (0.97, 1.11) | 0.96          | 3.37 | 2.84E-01 | 0.579 |
| Nutrient | Thiamine                                         | -0.02       | 0.02            | 0.98         | (0.93, 1.02) | 0.2           | 1.42 | 2.90E-01 | 0.580 |
| Nutrient | Phylloquinone vitamin K1                         | -0.02       | 0.02            | 0.98         | (0.94, 1.02) | 0.03          | 1.25 | 2.93E-01 | 0.580 |
| Nutrient | Lutein and zeaxanthin                            | -0.02       | 0.02            | 0.98         | (0.94, 1.02) | 0.05          | 1.23 | 2.95E-01 | 0.580 |
| Nutrient | Dietary phylloquinone vitamin K1                 | -0.02       | 0.02            | 0.98         | (0.94, 1.02) | 0.02          | 1.25 | 2.96E-01 | 0.584 |
| Nutrient | Total sugar                                      | 0.03        | 0.03            | 1.03         | (0.97, 1.09) | 0.6           | 2.5  | 3.01E-01 | 0.588 |
| Nutrient | Leucine                                          | 0.04        | 0.03            | 1.04         | (0.97, 1.11) | 0.87          | 3.39 | 3.08E-01 | 0.588 |
| Food     | Sweet rolls                                      | 0.02        | 0.02            | 1.02         | (0.98, 1.06) | 0.69          | 1.13 | 3.10E-01 | 0.588 |
| Nutrient | Total flavonoids                                 | -0.02       | 0.02            | 0.98         | (0.94, 1.02) | 0.97          | 1.16 | 3.10E-01 | 0.588 |
| Nutrient | Alpha linolenic                                  | -0.03       | 0.03            | 0.97         | (0.92, 1.03) | 0.26          | 2.02 | 3.11E-01 | 0.588 |
| Nutrient | Fructose                                         | 0.03        | 0.03            | 1.03         | (0.98, 1.08) | 0.4           | 1.74 | 3.11E-01 | 0.590 |
| Nutrient | Dietary vitamin C                                | -0.02       | 0.02            | 0.98         | (0.93, 1.02) | 0.29          | 1.44 | 3.16E-01 | 0.590 |
| Nutrient | Napoleiferin                                     | -0.02       | 0.02            | 0.98         | (0.94, 1.02) | 0.02          | 1.07 | 3.17E-01 | 0.590 |
| Nutrient | Glutamic acid                                    | 0.04        | 0.04            | 1.04         | (0.96, 1.12) | 0.96          | 4.23 | 3.18E-01 | 0.590 |
| Food     | Salsa                                            | -0.02       | 0.02            | 0.98         | (0.94, 1.02) | 0.07          | 1.03 | 3.20E-01 | 0.590 |
| Nutrient | Carbohydrate from refined grain                  | 0.03        | 0.03            | 1.03         | (0.97, 1.08) | 0.81          | 1.9  | 3.21E-01 | 0.591 |
| Nutrient | Dietary vitamin B12                              | 0.02        | 0.02            | 1.02         | (0.98, 1.07) | 0.13          | 1.33 | 3.23E-01 | 0.595 |
| Nutrient | Delphinidin                                      | -0.02       | 0.02            | 0.98         | (0.94, 1.02) | 0.49          | 1.1  | 3.32E-01 | 0.595 |
| Nutrient | Arginine                                         | 0.03        | 0.03            | 1.03         | (0.97, 1.10) | 0.35          | 3.12 | 3.33E-01 | 0.595 |
| Nutrient | Kaempferol                                       | -0.02       | 0.02            | 0.98         | (0.94, 1.02) | 0.28          | 1.08 | 3.33E-01 | 0.595 |
| Nutrient | Lycopene                                         | 0.02        | 0.02            | 1.02         | (0.98, 1.06) | 0.44          | 1.28 | 3.34E-01 | 0.595 |
| Food     | Eggplant, zucchini, summer squash                | -0.02       | 0.02            | 0.98         | (0.94, 1.02) | 0.67          | 1.05 | 3.35E-01 | 0.595 |
| Nutrient | Eriodictyol                                      | -0.02       | 0.02            | 0.98         | (0.95, 1.02) | 0.69          | 1.09 | 3.37E-01 | 0.595 |
| Nutrient | Total dietary omega 3                            | -0.03       | 0.03            | 0.97         | (0.92, 1.03) | 0.1           | 2.05 | 3.38E-01 | 0.596 |
| Nutrient | Delta tocotrienol                                | -0.02       | 0.02            | 0.98         | (0.94, 1.02) | 0.45          | 1.07 | 3.43E-01 | 0.596 |
| Nutrient | Choline from glycerophosphocholine               | -0.02       | 0.02            | 0.98         | (0.93, 1.02) | 0.12          | 1.6  | 3.44E-01 | 0.596 |
| Food     | Chocolate bars                                   | 0.02        | 0.02            | 1.02         | (0.98, 1.06) | 0.83          | 1.09 | 3.45E-01 | 0.596 |
| Nutrient | Total niacin                                     | -0.02       | 0.02            | 0.98         | (0.94, 1.02) | 0.26          | 1.48 | 3.46E-01 | 0.596 |
| Food     | Oranges                                          | -0.02       | 0.02            | 0.98         | (0.94, 1.02) | 0.73          | 1.07 | 3.47E-01 | 0.598 |
| Food     | Beer                                             | -0.02       | 0.02            | 0.98         | (0.95, 1.02) | 0.18          | 1.03 | 3.50E-01 | 0.600 |
| Nutrient | 4-Hydroxyglucobrassicin                          | -0.02       | 0.02            | 0.98         | (0.94, 1.02) | 0.03          | 1.08 | 3.53E-01 | 0.610 |
| Nutrient | Catechin                                         | -0.02       | 0.02            | 0.98         | (0.94, 1.02) | 0.86          | 1.2  | 3.63E-01 | 0.615 |
| Nutrient | Dairy protein                                    | -0.02       | 0.02            | 0.98         | (0.94, 1.02) | 0.49          | 1.41 | 3.69E-01 | 0.623 |
| Nutrient | Glucoerucin                                      | -0.02       | 0.02            | 0.98         | (0.95, 1.02) | 0.03          | 1.05 | 3.77E-01 | 0.623 |
| Nutrient | Starch                                           | -0.03       | 0.03            | 0.97         | (0.92, 1.03) | 0.55          | 2.5  | 3.79E-01 | 0.623 |
| Nutrient | Cysteine                                         | 0.03        | 0.04            | 1.03         | (0.96, 1.11) | 0.66          | 3.76 | 3.80E-01 | 0.625 |
| Nutrient | Total retinol                                    | -0.02       | 0.02            | 0.98         | (0.94, 1.02) | 0.81          | 1.32 | 3.84E-01 | 0.634 |
| Nutrient | Total theaflavins and polymers proanthocyanidins | -0.02       | 0.02            | 0.98         | (0.94, 1.02) | 0.82          | 1.12 | 3.93E-01 | 0.636 |
| Nutrient | Sucrose                                          | 0.02        | 0.03            | 1.02         | (0.97, 1.08) | 0.9           | 2.04 | 3.96E-01 | 0.641 |
| Nutrient | Tyrosine                                         | 0.03        | 0.04            | 1.03         | (0.96, 1.10) | 0.94          | 3.43 | 4.02E-01 | 0.641 |
| Nutrient | Flavonoids (no proanthocyanidins)                | -0.02       | 0.02            | 0.98         | (0.95, 1.02) | 0.9           | 1.09 | 4.05E-01 | 0.641 |
| Nutrient | Taurine                                          | 0.02        | 0.02            | 1.02         | (0.97, 1.07) | 0.98          | 1.42 | 4.06E-01 | 0.641 |
| Food     | Peach/apricot                                    | 0.02        | 0.02            | 1.02         | (0.98, 1.06) | 0.63          | 1.09 | 4.08E-01 | 0.667 |
| Nutrient | Total choline (no betaine)                       | 0.03        | 0.03            | 1.03         | (0.96, 1.09) | 0.53          | 2.79 | 4.31E-01 | 0.680 |
| Nutrient | Total omega 3                                    | -0.02       | 0.03            | 0.98         | (0.93, 1.03) | 0.18          | 1.96 | 4.45E-01 | 0.680 |
| Nutrient | Epigallocatechin                                 | -0.01       | 0.02            | 0.99         | (0.95, 1.02) | 0.95          | 1.04 | 4.46E-01 | 0.688 |
| Nutrient | Natural sugar                                    | -0.02       | 0.03            | 0.98         | (0.93, 1.03) | 0.58          | 1.74 | 4.55E-01 | 0.690 |
| Food     | 1% -2% milk                                      | -0.01       | 0.02            | 0.99         | (0.95, 1.02) | 0.51          | 1.03 | 4.58E-01 | 0.691 |
| Nutrient | Dietary copper                                   | -0.02       | 0.03            | 0.98         | (0.92, 1.04) | 0.32          | 2.79 | 4.62E-01 | 0.699 |
| Nutrient | Valine                                           | 0.03        | 0.04            | 1.03         | (0.96, 1.10) | 0.99          | 3.43 | 4.70E-01 | 0.700 |
| Food     | English muffins/bagels/rolls                     | -0.01       | 0.02            | 0.99         | (0.95, 1.03) | 0.76          | 1.09 | 4.74E-01 | 0.712 |
| Nutrient | Sugar from fruit juice                           | -0.01       | 0.02            | 0.99         | (0.95, 1.03) | 0.76          | 1.14 | 4.90E-01 | 0.712 |
| Nutrient | Choline from phosphocholine                      | -0.02       | 0.03            | 0.98         | (0.94, 1.03) | 0.69          | 1.75 | 4.90E-01 | 0.712 |
| Nutrient | Asparagine                                       | 0.02        | 0.03            | 1.02         | (0.96, 1.10) | 0.67          | 3.24 | 4.91E-01 | 0.715 |
| Nutrient | Sum of sulfur from methionine and cysteine       | 0.02        | 0.03            | 1.02         | (0.96, 1.09) | 0.7           | 2.69 | 4.95E-01 | 0.721 |
| Nutrient | Biochanin A                                      | -0.01       | 0.02            | 0.99         | (0.95, 1.03) | 0.74          | 1.13 | 5.03E-01 | 0.721 |
| Nutrient | Caffeine                                         | 0.01        | 0.02            | 1.01         | (0.97, 1.06) | 0.57          | 1.1  | 5.07E-01 | 0.721 |

Supplementary Table 3. cont.

| Type     | Exposure                      | Effect size | SE(effect size) | Hazard ratio | 95% CI       | P-value of PH | VIF  | P-value  | FDR   |
|----------|-------------------------------|-------------|-----------------|--------------|--------------|---------------|------|----------|-------|
| Nutrient | Fiber from cruciferous veg    | -0.01       | 0.02            | 0.99         | (0.95, 1.03) | 0.14          | 1.1  | 5.08E-01 | 0.721 |
| Food     | Chowder/cream soup            | 0.01        | 0.02            | 1.01         | (0.97, 1.05) | 0.78          | 1.09 | 5.09E-01 | 0.721 |
| Nutrient | Phenylalanine                 | 0.02        | 0.04            | 1.02         | (0.95, 1.10) | 0.93          | 3.89 | 5.11E-01 | 0.723 |
| Nutrient | Cystine                       | -0.02       | 0.04            | 0.98         | (0.91, 1.05) | 0.33          | 3.76 | 5.19E-01 | 0.723 |
| Nutrient | Total flavan-3-ols            | -0.01       | 0.02            | 0.99         | (0.95, 1.03) | 0.83          | 1.08 | 5.20E-01 | 0.723 |
| Nutrient | Epicatechin 3-gallate         | -0.01       | 0.02            | 0.99         | (0.95, 1.03) | 0.98          | 1.03 | 5.20E-01 | 0.733 |
| Nutrient | Glucobrassicin                | -0.01       | 0.02            | 0.99         | (0.95, 1.03) | 0.04          | 1.08 | 5.31E-01 | 0.735 |
| Food     | Tea                           | -0.01       | 0.02            | 0.99         | (0.95, 1.03) | 0.71          | 1.03 | 5.35E-01 | 0.735 |
| Food     | Yams or sweet potatoes        | -0.01       | 0.02            | 0.99         | (0.95, 1.03) | 0.04          | 1.09 | 5.39E-01 | 0.735 |
| Nutrient | Dairy vitamin D               | -0.01       | 0.02            | 0.99         | (0.95, 1.03) | 0.06          | 1.19 | 5.40E-01 | 0.744 |
| Food     | Tomato sauce                  | 0.01        | 0.02            | 1.01         | (0.97, 1.06) | 0.65          | 1.17 | 5.50E-01 | 0.750 |
| Nutrient | Glucocerysolin                | 0.01        | 0.02            | 1.01         | (0.97, 1.05) | 0.84          | 1.07 | 5.58E-01 | 0.762 |
| Nutrient | Aspartic acid                 | 0.02        | 0.03            | 1.02         | (0.95, 1.09) | 0.79          | 3.33 | 5.72E-01 | 0.767 |
| Nutrient | Gluten                        | -0.01       | 0.03            | 0.99         | (0.94, 1.04) | 0.95          | 1.86 | 5.81E-01 | 0.767 |
| Food     | Decaffeinated coffee          | -0.01       | 0.02            | 0.99         | (0.95, 1.03) | 0.18          | 1    | 5.82E-01 | 0.770 |
| Nutrient | Gluconasturtiin               | -0.01       | 0.02            | 0.99         | (0.95, 1.03) | 0             | 1.06 | 5.89E-01 | 0.770 |
| Nutrient | Total glucosinolates          | -0.01       | 0.02            | 0.99         | (0.95, 1.03) | 0.03          | 1.09 | 5.90E-01 | 0.772 |
| Nutrient | Bergapten                     | -0.01       | 0.02            | 0.99         | (0.95, 1.03) | 0.15          | 1.09 | 5.96E-01 | 0.772 |
| Food     | Blueberries                   | -0.01       | 0.02            | 0.99         | (0.95, 1.03) | 0.89          | 1.06 | 5.97E-01 | 0.772 |
| Nutrient | Serine                        | 0.02        | 0.04            | 1.02         | (0.95, 1.10) | 0.77          | 3.97 | 5.99E-01 | 0.772 |
| Food     | Onions as a garnish           | -0.01       | 0.02            | 0.99         | (0.95, 1.03) | 0.55          | 1.05 | 6.03E-01 | 0.772 |
| Food     | Potatoes, baked/boiled/mashed | 0.01        | 0.02            | 1.01         | (0.97, 1.05) | 0.26          | 1.22 | 6.03E-01 | 0.772 |
| Food     | Crackers                      | -0.01       | 0.02            | 0.99         | (0.95, 1.03) | 0.47          | 1.09 | 6.08E-01 | 0.772 |
| Nutrient | Glucose                       | 0.01        | 0.03            | 1.01         | (0.96, 1.07) | 0.4           | 1.89 | 6.11E-01 | 0.772 |
| Food     | Ice cream                     | -0.01       | 0.02            | 0.99         | (0.95, 1.03) | 0.13          | 1.09 | 6.13E-01 | 0.772 |
| Food     | Cooked onions                 | -0.01       | 0.02            | 0.99         | (0.95, 1.03) | 0.42          | 1.05 | 6.14E-01 | 0.772 |
| Food     | Grapefruit and juice          | -0.01       | 0.02            | 0.99         | (0.95, 1.03) | 0.05          | 1.04 | 6.16E-01 | 0.772 |
| Food     | Pizza                         | -0.01       | 0.02            | 0.99         | (0.95, 1.03) | 0.34          | 1.18 | 6.17E-01 | 0.778 |
| Food     | Cooked spinach                | 0.01        | 0.02            | 1.01         | (0.97, 1.05) | 0.6           | 1.05 | 6.27E-01 | 0.778 |
| Nutrient | Gallocatechin                 | -0.01       | 0.02            | 0.99         | (0.95, 1.03) | 0.98          | 1.02 | 6.29E-01 | 0.778 |
| Nutrient | Sulfur from cysteine          | -0.01       | 0.03            | 0.99         | (0.93, 1.04) | 0.42          | 2.35 | 6.30E-01 | 0.778 |
| Food     | Margarine                     | 0.01        | 0.02            | 1.01         | (0.97, 1.05) | 0.73          | 1.08 | 6.33E-01 | 0.784 |
| Nutrient | 4-Methoxyglucobrassicin       | -0.01       | 0.02            | 0.99         | (0.95, 1.03) | 0.03          | 1.09 | 6.42E-01 | 0.788 |
| Nutrient | Total potassium               | -0.01       | 0.03            | 0.99         | (0.93, 1.05) | 0.85          | 2.81 | 6.49E-01 | 0.792 |
| Nutrient | Carbohydrate from potato      | 0.01        | 0.02            | 1.01         | (0.97, 1.05) | 0.62          | 1.31 | 6.55E-01 | 0.792 |
| Food     | Pancakes or waffles           | 0.01        | 0.02            | 1.01         | (0.97, 1.05) | 0.99          | 1.1  | 6.57E-01 | 0.809 |
| Nutrient | Cyanidin                      | -0.01       | 0.02            | 0.99         | (0.95, 1.03) | 0.41          | 1.21 | 6.80E-01 | 0.809 |
| Nutrient | Theaflavin                    | -0.01       | 0.02            | 0.99         | (0.95, 1.03) | 0.98          | 1.02 | 6.80E-01 | 0.817 |
| Food     | Cream                         | 0.01        | 0.02            | 1.01         | (0.97, 1.05) | 0.4           | 1.04 | 6.92E-01 | 0.824 |
| Nutrient | Proline                       | 0.01        | 0.04            | 1.01         | (0.94, 1.09) | 0.67          | 3.91 | 7.01E-01 | 0.835 |
| Food     | banana                        | -0.01       | 0.02            | 0.99         | (0.95, 1.03) | 0.76          | 1.13 | 7.17E-01 | 0.835 |
| Nutrient | Linolenic acid                | -0.01       | 0.03            | 0.99         | (0.93, 1.05) | 0.72          | 2.51 | 7.20E-01 | 0.835 |
| Nutrient | Glucioiberin                  | 0.01        | 0.02            | 1.01         | (0.97, 1.05) | 0.05          | 1.09 | 7.22E-01 | 0.835 |
| Food     | Cake                          | 0.01        | 0.02            | 1.01         | (0.97, 1.05) | 0.71          | 1.18 | 7.24E-01 | 0.848 |
| Nutrient | Carbohydrates                 | 0.01        | 0.04            | 1.01         | (0.93, 1.10) | 0.77          | 5.16 | 7.45E-01 | 0.848 |
| Nutrient | Natural vitamin B6            | -0.01       | 0.03            | 0.99         | (0.93, 1.05) | 0.52          | 2.65 | 7.47E-01 | 0.848 |
| Food     | Beans or lentils              | 0.01        | 0.02            | 1.01         | (0.97, 1.05) | 0.71          | 1.1  | 7.47E-01 | 0.848 |
| Food     | Other fish                    | 0.01        | 0.02            | 1.01         | (0.97, 1.05) | 0.38          | 1.04 | 7.49E-01 | 0.857 |
| Nutrient | Glutamine                     | 0.01        | 0.04            | 1.01         | (0.93, 1.10) | 0.81          | 4.62 | 7.61E-01 | 0.862 |
| Nutrient | Vegetable fiber               | -0.01       | 0.02            | 0.99         | (0.95, 1.04) | 0.01          | 1.36 | 7.69E-01 | 0.867 |
| Nutrient | Delta tocopherol              | -0.01       | 0.03            | 0.99         | (0.94, 1.04) | 0.83          | 1.88 | 7.80E-01 | 0.867 |
| Food     | Other cooked cereal           | 0.01        | 0.02            | 1.01         | (0.97, 1.04) | 0.36          | 1.03 | 7.81E-01 | 0.888 |
| Nutrient | Dietary zinc                  | 0.01        | 0.03            | 1.01         | (0.95, 1.07) | 0.15          | 2.71 | 8.08E-01 | 0.893 |
| Food     | Cauliflower                   | 0           | 0.02            | 1            | (0.96, 1.03) | 0.24          | 1.04 | 8.16E-01 | 0.908 |
| Food     | Brown rice                    | 0           | 0.02            | 1            | (0.96, 1.05) | 0.35          | 1.05 | 8.38E-01 | 0.908 |
| Nutrient | Glucioibervirin               | 0           | 0.02            | 1            | (0.97, 1.04) | 0.16          | 1.06 | 8.40E-01 | 0.908 |
| Food     | Shrimp, lobster, scallops     | 0           | 0.02            | 1            | (0.97, 1.04) | 0.85          | 1.05 | 8.41E-01 | 0.915 |
| Food     | Egg                           | 0           | 0.02            | 1            | (0.96, 1.04) | 0.35          | 1.12 | 8.53E-01 | 0.923 |
| Food     | Cottage ricotta cheese        | 0           | 0.02            | 1            | (0.96, 1.04) | 0.04          | 1.05 | 8.66E-01 | 0.923 |
| Food     | Chicken liver                 | 0           | 0.02            | 1            | (0.96, 1.03) | 0.97          | 1.01 | 8.68E-01 | 0.925 |



Supplementary Table 3. cont.

| Type     | Exposure                     | Effect size | SE(effect size) | Hazard ratio | 95% CI       | P-value of PH | VIF  | P-value  | FDR   |
|----------|------------------------------|-------------|-----------------|--------------|--------------|---------------|------|----------|-------|
| Food     | Cooked carrot                | 0           | 0.02            | 1            | (0.97, 1.04) | 0.49          | 1.09 | 8.72E-01 | 0.940 |
| Nutrient | Epicatechin                  | 0           | 0.02            | 1            | (0.96, 1.04) | 0.89          | 1.19 | 8.93E-01 | 0.951 |
| Nutrient | Glucoraphenin                | 0           | 0.02            | 1            | (0.96, 1.03) | 0.14          | 1.03 | 9.10E-01 | 0.951 |
| Food     | Cantaloupe                   | 0           | 0.02            | 1            | (0.97, 1.04) | 0.11          | 1.04 | 9.12E-01 | 0.971 |
| Food     | Strawberries                 | 0           | 0.02            | 1            | (0.96, 1.04) | 0.57          | 1.06 | 9.38E-01 | 0.973 |
| Food     | Non-dairy coffee whitener    | 0           | 0.02            | 1            | (0.97, 1.04) | 0.07          | 1.01 | 9.43E-01 | 0.973 |
| Nutrient | Sum of betaine and choline   | 0           | 0.03            | 1            | (0.93, 1.07) | 0.82          | 3.19 | 9.46E-01 | 0.976 |
| Nutrient | Dietary retinol              | 0           | 0.02            | 1            | (0.96, 1.04) | 0.42          | 1.21 | 9.55E-01 | 0.976 |
| Nutrient | 22:5 fatty acid              | 0           | 0.02            | 1            | (0.96, 1.04) | 0.74          | 1.12 | 9.56E-01 | 0.978 |
| Nutrient | Carbohydrate from legumes    | 0           | 0.02            | 1            | (0.96, 1.05) | 0.04          | 1.28 | 9.62E-01 | 0.979 |
| Food     | Potato chips or corn chips   | 0           | 0.02            | 1            | (0.96, 1.04) | 0.27          | 1.13 | 9.67E-01 | 0.979 |
| Food     | Kale                         | 0           | 0.02            | 1            | (0.96, 1.04) | 0.1           | 1.05 | 9.69E-01 | 0.985 |
| Nutrient | Gamma tocotrienol            | 0           | 0.02            | 1            | (0.96, 1.05) | 0.61          | 1.29 | 9.80E-01 | 0.996 |
| Food     | Chicken/turkey, without skin | 0           | 0.02            | 1            | (0.96, 1.04) | 0.96          | 1.04 | 9.95E-01 | 0.996 |

Supplementary Table 4: **EWAS Results for Time-Dose Effects.** All the exposures analyzed in our study, statistically significant or non-significant, are listed here. P-values are associated with two-sided Wald tests.

| Type     | Exposure                                       | Effect size | SE(effect size) | Hazard ratio | 95% CI       | P-value of PH | VIF  | P-value  | FDR   |
|----------|------------------------------------------------|-------------|-----------------|--------------|--------------|---------------|------|----------|-------|
| Nutrient | Trans 16:1                                     | 0.19        | 0.03            | 1.21         | (1.15, 1.28) | 0.44          | 1.80 | 3.17E-13 | 0.000 |
| Nutrient | Alcohol                                        | -0.14       | 0.02            | 0.87         | (0.84, 0.91) | 0.20          | 1.11 | 6.65E-12 | 0.000 |
| Nutrient | Discretionary solid fat                        | 0.17        | 0.03            | 1.19         | (1.12, 1.26) | 0.64          | 2.14 | 1.41E-09 | 0.005 |
| Nutrient | Discretionary liquid fat                       | -0.14       | 0.02            | 0.87         | (0.83, 0.91) | 0.75          | 1.45 | 6.74E-09 | 0.006 |
| Nutrient | Trans 18:2                                     | 0.15        | 0.03            | 1.17         | (1.11, 1.23) | 0.78          | 1.57 | 8.40E-09 | 0.006 |
| Food     | White wine                                     | -0.13       | 0.02            | 0.88         | (0.84, 0.92) | 0.71          | 1.06 | 1.27E-08 | 0.006 |
| Nutrient | Animal fat                                     | 0.15        | 0.03            | 1.16         | (1.10, 1.23) | 0.77          | 2.06 | 3.30E-08 | 0.007 |
| Nutrient | Animal MUFA                                    | 0.14        | 0.03            | 1.15         | (1.10, 1.22) | 0.86          | 1.95 | 6.44E-08 | 0.008 |
| Nutrient | Palmitoleic acid                               | 0.15        | 0.03            | 1.16         | (1.10, 1.23) | 0.80          | 2.21 | 9.10E-08 | 0.008 |
| Nutrient | Trans 18:1                                     | 0.14        | 0.03            | 1.16         | (1.10, 1.22) | 0.86          | 1.83 | 1.04E-07 | 0.008 |
| Nutrient | Sodium                                         | 0.16        | 0.03            | 1.17         | (1.11, 1.25) | 0.33          | 2.29 | 1.08E-07 | 0.008 |
| Nutrient | Supplemental or fortified folic acid           | -0.12       | 0.02            | 0.89         | (0.85, 0.93) | 0.65          | 1.63 | 8.04E-07 | 0.020 |
| Nutrient | Hydroxyproline                                 | 0.12        | 0.02            | 1.13         | (1.07, 1.18) | 0.83          | 1.59 | 9.81E-07 | 0.020 |
| Nutrient | Total trans fat                                | 0.13        | 0.03            | 1.14         | (1.08, 1.20) | 0.45          | 1.86 | 1.83E-06 | 0.022 |
| Nutrient | Carbohydrate from wholegrain                   | -0.10       | 0.02            | 0.90         | (0.87, 0.94) | 0.32          | 1.29 | 1.88E-06 | 0.022 |
| Nutrient | Carbohydrate from milled wholegrain            | -0.10       | 0.02            | 0.90         | (0.87, 0.94) | 0.19          | 1.28 | 2.03E-06 | 0.022 |
| Food     | White bread                                    | 0.09        | 0.02            | 1.09         | (1.05, 1.13) | 0.03          | 1.10 | 2.39E-06 | 0.022 |
| Nutrient | Added bran from wheat, rice, ...               | -0.10       | 0.02            | 0.91         | (0.87, 0.95) | 0.00          | 1.15 | 4.48E-06 | 0.028 |
| Nutrient | Cholesterol                                    | 0.11        | 0.03            | 1.12         | (1.07, 1.18) | 0.08          | 1.82 | 6.79E-06 | 0.030 |
| Food     | Liquor                                         | -0.09       | 0.02            | 0.92         | (0.88, 0.95) | 0.34          | 1.05 | 1.00E-05 | 0.034 |
| Nutrient | Stearic acid                                   | 0.13        | 0.03            | 1.14         | (1.07, 1.21) | 0.33          | 2.54 | 1.35E-05 | 0.036 |
| Food     | Apple juice or cider                           | 0.08        | 0.02            | 1.08         | (1.04, 1.12) | 1.00          | 1.05 | 1.46E-05 | 0.036 |
| Nutrient | Natural germ                                   | -0.09       | 0.02            | 0.91         | (0.87, 0.95) | 0.44          | 1.23 | 1.49E-05 | 0.036 |
| Food     | Doughnuts                                      | 0.08        | 0.02            | 1.08         | (1.04, 1.12) | 0.11          | 1.09 | 2.03E-05 | 0.039 |
| Nutrient | Total saturated fat                            | 0.13        | 0.03            | 1.14         | (1.07, 1.21) | 0.32          | 2.73 | 2.95E-05 | 0.042 |
| Food     | Yogurt                                         | -0.09       | 0.02            | 0.91         | (0.88, 0.95) | 0.04          | 1.06 | 3.07E-05 | 0.042 |
| Nutrient | Heme iron                                      | 0.10        | 0.02            | 1.10         | (1.05, 1.16) | 0.89          | 1.58 | 3.82E-05 | 0.044 |
| Nutrient | Natural bran                                   | -0.09       | 0.02            | 0.92         | (0.88, 0.96) | 0.46          | 1.26 | 3.97E-05 | 0.044 |
| Nutrient | Palmitic acid                                  | 0.13        | 0.03            | 1.14         | (1.07, 1.22) | 0.58          | 3.04 | 4.66E-05 | 0.047 |
| Nutrient | Dietary choline from phosphatidylcholine       | 0.10        | 0.03            | 1.11         | (1.05, 1.17) | 0.28          | 2.05 | 1.14E-04 | 0.069 |
| Nutrient | Supplemental selenium                          | -0.08       | 0.02            | 0.92         | (0.88, 0.96) | 0.89          | 1.34 | 1.39E-04 | 0.073 |
| Nutrient | Alpha tocotrienol                              | -0.09       | 0.02            | 0.91         | (0.87, 0.96) | 0.24          | 1.46 | 1.52E-04 | 0.074 |
| Nutrient | Choline from sphingomyelin                     | 0.10        | 0.03            | 1.10         | (1.05, 1.16) | 0.84          | 1.82 | 1.60E-04 | 0.074 |
| Nutrient | Beta tocopherol                                | -0.09       | 0.03            | 0.91         | (0.87, 0.96) | 0.19          | 1.74 | 2.39E-04 | 0.086 |
| Nutrient | Dietary folate                                 | -0.09       | 0.03            | 0.91         | (0.86, 0.96) | 0.30          | 1.80 | 2.53E-04 | 0.086 |
| Nutrient | Cereal fiber                                   | -0.08       | 0.02            | 0.92         | (0.88, 0.96) | 0.00          | 1.46 | 2.85E-04 | 0.087 |
| Food     | Hamburger                                      | 0.07        | 0.02            | 1.07         | (1.03, 1.11) | 0.72          | 1.14 | 2.86E-04 | 0.087 |
| Nutrient | Total manganese                                | -0.09       | 0.02            | 0.92         | (0.87, 0.96) | 0.66          | 1.60 | 3.10E-04 | 0.087 |
| Food     | Salad/oil and vinegar dressing                 | -0.07       | 0.02            | 0.93         | (0.90, 0.97) | 0.07          | 1.06 | 3.20E-04 | 0.087 |
| Nutrient | Beta tocotrienol                               | -0.08       | 0.02            | 0.93         | (0.89, 0.97) | 0.19          | 1.29 | 3.36E-04 | 0.087 |
| Nutrient | Threonine                                      | 0.11        | 0.03            | 1.12         | (1.05, 1.20) | 0.62          | 3.01 | 3.82E-04 | 0.091 |
| Food     | Hotdog                                         | 0.06        | 0.02            | 1.06         | (1.03, 1.10) | 0.78          | 1.06 | 4.27E-04 | 0.094 |
| Nutrient | Total vitamin E                                | -0.08       | 0.02            | 0.92         | (0.88, 0.96) | 0.39          | 1.80 | 4.92E-04 | 0.098 |
| Nutrient | Tryptophan                                     | 0.12        | 0.03            | 1.13         | (1.05, 1.20) | 0.35          | 3.35 | 5.74E-04 | 0.100 |
| Food     | All processed meats                            | 0.07        | 0.02            | 1.07         | (1.03, 1.11) | 0.53          | 1.12 | 6.03E-04 | 0.100 |
| Food     | Raisins or grapes                              | -0.07       | 0.02            | 0.93         | (0.90, 0.97) | 0.75          | 1.07 | 6.15E-04 | 0.100 |
| Nutrient | Dihydrovitamin K                               | 0.08        | 0.02            | 1.09         | (1.04, 1.14) | 0.60          | 1.47 | 6.16E-04 | 0.100 |
| Nutrient | Supplemental iodine                            | -0.08       | 0.02            | 0.93         | (0.89, 0.97) | 0.14          | 1.35 | 6.81E-04 | 0.103 |
| Nutrient | Animal protein                                 | 0.09        | 0.03            | 1.10         | (1.04, 1.15) | 0.51          | 2.01 | 7.32E-04 | 0.105 |
| Nutrient | Myristic acid                                  | 0.08        | 0.02            | 1.09         | (1.03, 1.14) | 0.46          | 1.75 | 8.08E-04 | 0.108 |
| Nutrient | Isorhamnetin                                   | -0.07       | 0.02            | 0.93         | (0.89, 0.97) | 0.27          | 1.19 | 8.54E-04 | 0.108 |
| Nutrient | Phytate                                        | -0.09       | 0.03            | 0.92         | (0.87, 0.96) | 0.00          | 1.88 | 8.74E-04 | 0.108 |
| Food     | Pie                                            | 0.06        | 0.02            | 1.06         | (1.03, 1.10) | 0.10          | 1.12 | 1.05E-03 | 0.116 |
| Nutrient | Menaquinone vitamin K2 (4 isoprenoid residues) | 0.07        | 0.02            | 1.08         | (1.03, 1.13) | 0.05          | 1.44 | 1.16E-03 | 0.119 |
| Nutrient | Dietary choline                                | 0.11        | 0.03            | 1.11         | (1.04, 1.19) | 0.34          | 3.06 | 1.19E-03 | 0.119 |
| Nutrient | Plant MUFA                                     | -0.08       | 0.03            | 0.92         | (0.88, 0.97) | 0.88          | 1.81 | 1.23E-03 | 0.119 |
| Nutrient | Dietary manganese                              | -0.08       | 0.03            | 0.92         | (0.87, 0.97) | 0.01          | 1.91 | 1.61E-03 | 0.133 |
| Food     | Beverages with sugar                           | 0.06        | 0.02            | 1.06         | (1.02, 1.10) | 0.51          | 1.11 | 1.69E-03 | 0.134 |
| Food     | Peanuts                                        | -0.07       | 0.02            | 0.94         | (0.90, 0.98) | 0.56          | 1.06 | 1.95E-03 | 0.141 |
| Nutrient | Sulfur from methionine                         | 0.09        | 0.03            | 1.10         | (1.03, 1.16) | 0.97          | 2.46 | 1.98E-03 | 0.141 |

Supplementary Table 4. cont.

| Type     | Exposure                                   | Effect size | SE(effect size) | Hazard ratio | 95% CI       | P-value of PH | VIF  | P-value  | FDR   |
|----------|--------------------------------------------|-------------|-----------------|--------------|--------------|---------------|------|----------|-------|
| Food     | Romaine or leaf lettuce                    | -0.06       | 0.02            | 0.94         | (0.90, 0.98) | 0.38          | 1.07 | 2.21E-03 | 0.145 |
| Nutrient | Total pyridoxine                           | -0.07       | 0.02            | 0.93         | (0.89, 0.97) | 0.20          | 1.48 | 2.31E-03 | 0.145 |
| Nutrient | Isoleucine                                 | 0.10        | 0.03            | 1.10         | (1.04, 1.18) | 0.79          | 3.02 | 2.35E-03 | 0.145 |
| Nutrient | Food supplemented alpha tocopherol         | -0.06       | 0.02            | 0.94         | (0.90, 0.98) | 0.77          | 1.08 | 2.43E-03 | 0.145 |
| Nutrient | Histidine                                  | 0.10        | 0.03            | 1.10         | (1.04, 1.18) | 0.75          | 3.09 | 2.45E-03 | 0.145 |
| Nutrient | Total magnesium                            | -0.09       | 0.03            | 0.92         | (0.87, 0.97) | 0.84          | 2.21 | 2.57E-03 | 0.147 |
| Food     | Raw carrots                                | -0.06       | 0.02            | 0.94         | (0.90, 0.98) | 0.03          | 1.08 | 3.02E-03 | 0.155 |
| Nutrient | Sinigrin                                   | 0.06        | 0.02            | 1.06         | (1.02, 1.10) | 0.05          | 1.07 | 3.05E-03 | 0.155 |
| Food     | Whole milk                                 | 0.05        | 0.02            | 1.06         | (1.02, 1.09) | 0.01          | 1.05 | 3.28E-03 | 0.155 |
| Nutrient | Methionine                                 | 0.09        | 0.03            | 1.10         | (1.03, 1.16) | 0.97          | 2.77 | 3.31E-03 | 0.155 |
| Nutrient | Glycine                                    | 0.09        | 0.03            | 1.10         | (1.03, 1.17) | 0.70          | 2.83 | 3.37E-03 | 0.155 |
| Nutrient | Lysine                                     | 0.09        | 0.03            | 1.09         | (1.03, 1.16) | 0.92          | 2.58 | 3.40E-03 | 0.155 |
| Nutrient | Alanine                                    | 0.09        | 0.03            | 1.10         | (1.03, 1.16) | 0.80          | 2.82 | 3.63E-03 | 0.158 |
| Food     | Olive oil                                  | -0.06       | 0.02            | 0.94         | (0.90, 0.98) | 0.58          | 1.06 | 4.04E-03 | 0.166 |
| Food     | Red wine                                   | -0.06       | 0.02            | 0.94         | (0.90, 0.98) | 0.97          | 1.04 | 4.89E-03 | 0.181 |
| Nutrient | Dietary retinol                            | 0.06        | 0.02            | 1.06         | (1.02, 1.10) | 0.94          | 1.19 | 5.60E-03 | 0.193 |
| Food     | Beef or lamb as a main dish                | 0.06        | 0.02            | 1.06         | (1.02, 1.10) | 0.61          | 1.21 | 6.00E-03 | 0.197 |
| Nutrient | Protein                                    | 0.10        | 0.03            | 1.10         | (1.03, 1.18) | 0.88          | 3.49 | 6.09E-03 | 0.197 |
| Food     | Other nuts                                 | -0.06       | 0.02            | 0.94         | (0.90, 0.98) | 0.54          | 1.10 | 7.62E-03 | 0.214 |
| Nutrient | Choline from phosphatidylcholine           | 0.07        | 0.03            | 1.07         | (1.02, 1.12) | 0.22          | 1.87 | 7.80E-03 | 0.214 |
| Nutrient | Cysteine                                   | 0.10        | 0.04            | 1.10         | (1.03, 1.18) | 0.48          | 3.78 | 7.98E-03 | 0.214 |
| Food     | String beans                               | 0.05        | 0.02            | 1.05         | (1.01, 1.09) | 0.27          | 1.07 | 8.22E-03 | 0.214 |
| Nutrient | Malvidin                                   | -0.05       | 0.02            | 0.95         | (0.91, 0.99) | 0.41          | 1.10 | 8.38E-03 | 0.214 |
| Nutrient | Total calcium                              | -0.06       | 0.02            | 0.94         | (0.90, 0.99) | 0.16          | 1.37 | 8.42E-03 | 0.214 |
| Nutrient | Pantothenic acid                           | -0.06       | 0.02            | 0.94         | (0.89, 0.98) | 0.19          | 1.65 | 8.53E-03 | 0.214 |
| Food     | Beef/pork/lamb as a sandwich               | 0.05        | 0.02            | 1.05         | (1.01, 1.10) | 0.76          | 1.18 | 8.84E-03 | 0.214 |
| Food     | Beef liver                                 | 0.05        | 0.02            | 1.05         | (1.01, 1.08) | 0.44          | 1.01 | 8.90E-03 | 0.214 |
| Nutrient | Carbohydrate from intact wholegrain        | -0.05       | 0.02            | 0.95         | (0.91, 0.99) | 0.58          | 1.11 | 8.94E-03 | 0.214 |
| Food     | Cold breakfast cereal                      | -0.05       | 0.02            | 0.95         | (0.91, 0.99) | 0.03          | 1.06 | 9.02E-03 | 0.214 |
| Food     | Dark meat fish                             | -0.05       | 0.02            | 0.95         | (0.91, 0.99) | 0.38          | 1.05 | 9.30E-03 | 0.215 |
| Nutrient | Total beta carotene                        | -0.05       | 0.02            | 0.95         | (0.91, 0.99) | 0.12          | 1.26 | 9.60E-03 | 0.216 |
| Nutrient | Dietary tocopherols                        | -0.08       | 0.03            | 0.93         | (0.88, 0.98) | 0.67          | 2.35 | 1.01E-02 | 0.220 |
| Nutrient | Total fat                                  | 0.09        | 0.04            | 1.09         | (1.02, 1.17) | 0.33          | 3.51 | 1.04E-02 | 0.221 |
| Nutrient | Glucoscheirolin                            | 0.05        | 0.02            | 1.05         | (1.01, 1.09) | 0.02          | 1.02 | 1.09E-02 | 0.224 |
| Nutrient | Tyrosine                                   | 0.08        | 0.03            | 1.09         | (1.02, 1.16) | 0.98          | 3.17 | 1.21E-02 | 0.233 |
| Nutrient | Leucine                                    | 0.08        | 0.03            | 1.09         | (1.02, 1.16) | 0.74          | 3.19 | 1.21E-02 | 0.233 |
| Nutrient | Arginine                                   | 0.08        | 0.03            | 1.08         | (1.02, 1.16) | 0.63          | 3.06 | 1.33E-02 | 0.240 |
| Food     | Muffins or biscuits                        | 0.05        | 0.02            | 1.05         | (1.01, 1.09) | 0.05          | 1.09 | 1.35E-02 | 0.240 |
| Nutrient | Eicosenoic acid                            | -0.06       | 0.02            | 0.94         | (0.90, 0.99) | 0.26          | 1.32 | 1.36E-02 | 0.240 |
| Nutrient | Asparagine                                 | 0.08        | 0.03            | 1.09         | (1.02, 1.16) | 0.56          | 3.23 | 1.41E-02 | 0.240 |
| Nutrient | Sum of sulfur from methionine and cysteine | 0.07        | 0.03            | 1.07         | (1.01, 1.14) | 0.84          | 2.49 | 1.41E-02 | 0.240 |
| Nutrient | Synthetic vitamin B6                       | -0.05       | 0.02            | 0.95         | (0.92, 0.99) | 0.14          | 1.05 | 1.42E-02 | 0.240 |
| Nutrient | Dairy fat                                  | 0.05        | 0.02            | 1.06         | (1.01, 1.10) | 0.61          | 1.45 | 1.45E-02 | 0.240 |
| Nutrient | Dietary sulfur                             | 0.09        | 0.04            | 1.09         | (1.02, 1.17) | 0.77          | 3.51 | 1.57E-02 | 0.245 |
| Nutrient | Dietary vitamin B12                        | 0.05        | 0.02            | 1.05         | (1.01, 1.10) | 0.15          | 1.31 | 1.58E-02 | 0.245 |
| Nutrient | Aspartic acid                              | 0.08        | 0.03            | 1.08         | (1.02, 1.16) | 0.97          | 3.24 | 1.58E-02 | 0.245 |
| Nutrient | Glutamic acid                              | 0.09        | 0.04            | 1.09         | (1.02, 1.18) | 0.80          | 4.05 | 1.62E-02 | 0.246 |
| Nutrient | Gluconapin                                 | 0.05        | 0.02            | 1.05         | (1.01, 1.09) | 0.03          | 1.05 | 1.66E-02 | 0.246 |
| Nutrient | Fiber from legumes                         | -0.05       | 0.02            | 0.95         | (0.91, 0.99) | 0.50          | 1.23 | 1.67E-02 | 0.246 |
| Food     | Margarine                                  | 0.05        | 0.02            | 1.05         | (1.01, 1.09) | 0.86          | 1.06 | 1.72E-02 | 0.246 |
| Nutrient | Vegetable fat                              | -0.07       | 0.03            | 0.94         | (0.89, 0.99) | 0.51          | 2.08 | 1.73E-02 | 0.246 |
| Nutrient | Valine                                     | 0.08        | 0.03            | 1.08         | (1.01, 1.16) | 0.99          | 3.24 | 1.76E-02 | 0.247 |
| Food     | Brussels sprouts                           | 0.04        | 0.02            | 1.04         | (1.01, 1.08) | 0.04          | 1.02 | 1.81E-02 | 0.248 |
| Nutrient | Total zinc                                 | -0.05       | 0.02            | 0.95         | (0.91, 0.99) | 0.61          | 1.46 | 1.89E-02 | 0.250 |
| Food     | Broccoli                                   | -0.05       | 0.02            | 0.95         | (0.92, 0.99) | 0.02          | 1.07 | 1.89E-02 | 0.250 |
| Nutrient | Hesperetin                                 | -0.05       | 0.02            | 0.96         | (0.92, 0.99) | 0.58          | 1.10 | 2.03E-02 | 0.258 |
| Nutrient | Taurine                                    | 0.05        | 0.02            | 1.05         | (1.01, 1.10) | 0.69          | 1.42 | 2.09E-02 | 0.259 |
| Nutrient | Glucoraphanin                              | -0.04       | 0.02            | 0.96         | (0.92, 0.99) | 0.02          | 1.07 | 2.11E-02 | 0.259 |
| Nutrient | Glucobarbarin                              | -0.05       | 0.02            | 0.95         | (0.92, 0.99) | 0.03          | 1.06 | 2.20E-02 | 0.263 |
| Nutrient | Total vitamin C                            | -0.05       | 0.02            | 0.95         | (0.91, 0.99) | 0.65          | 1.30 | 2.25E-02 | 0.265 |

Supplementary Table 4. cont.

| Type     | Exposure                              | Effect size | SE(effect size) | Hazard ratio | 95% CI       | P-value of PH | VIF  | P-value  | FDR   |
|----------|---------------------------------------|-------------|-----------------|--------------|--------------|---------------|------|----------|-------|
| Nutrient | Glucoerysolin                         | 0.03        | 0.02            | 1.03         | (0.99, 1.07) | 0.84          | 1.04 | 1.25E-01 | 0.495 |
| Nutrient | Luteolin                              | -0.03       | 0.02            | 0.97         | (0.93, 1.01) | 0.68          | 1.17 | 1.31E-01 | 0.507 |
| Food     | Peas, or lima beans                   | 0.03        | 0.02            | 1.03         | (0.99, 1.07) | 0.78          | 1.08 | 1.41E-01 | 0.529 |
| Nutrient | Carbohydrate from potato              | 0.03        | 0.02            | 1.03         | (0.99, 1.08) | 0.36          | 1.26 | 1.43E-01 | 0.530 |
| Nutrient | Glucosylsin                           | -0.03       | 0.02            | 0.97         | (0.93, 1.01) | 0.01          | 1.07 | 1.45E-01 | 0.531 |
| Nutrient | Lauric acid                           | 0.03        | 0.02            | 1.03         | (0.99, 1.07) | 0.19          | 1.32 | 1.51E-01 | 0.543 |
| Food     | Pasta                                 | -0.03       | 0.02            | 0.97         | (0.93, 1.01) | 0.12          | 1.14 | 1.53E-01 | 0.543 |
| Nutrient | Caffeine                              | 0.03        | 0.02            | 1.03         | (0.99, 1.07) | 0.63          | 1.13 | 1.54E-01 | 0.543 |
| Nutrient | Dietary magnesium                     | -0.05       | 0.03            | 0.95         | (0.90, 1.02) | 0.17          | 2.96 | 1.56E-01 | 0.543 |
| Nutrient | Crude fiber                           | -0.04       | 0.03            | 0.96         | (0.91, 1.01) | 0.03          | 1.96 | 1.58E-01 | 0.543 |
| Nutrient | Beta cryptoxanthin                    | -0.03       | 0.02            | 0.97         | (0.93, 1.01) | 0.81          | 1.20 | 1.58E-01 | 0.543 |
| Nutrient | Dietary riboflavin                    | -0.04       | 0.03            | 0.96         | (0.91, 1.02) | 0.56          | 2.12 | 1.59E-01 | 0.543 |
| Food     | Ketchup or red chili sauce            | -0.03       | 0.02            | 0.97         | (0.93, 1.01) | 0.54          | 1.09 | 1.60E-01 | 0.544 |
| Nutrient | Gamma tocotrienol                     | -0.03       | 0.02            | 0.97         | (0.93, 1.01) | 0.52          | 1.26 | 1.68E-01 | 0.556 |
| Nutrient | Delta tocopherol                      | 0.03        | 0.02            | 1.03         | (0.99, 1.08) | 0.79          | 1.66 | 1.68E-01 | 0.556 |
| Food     | Apple and pear                        | -0.03       | 0.02            | 0.97         | (0.94, 1.01) | 0.26          | 1.08 | 1.71E-01 | 0.557 |
| Food     | Oranges                               | -0.03       | 0.02            | 0.97         | (0.94, 1.01) | 0.48          | 1.05 | 1.71E-01 | 0.557 |
| Food     | Potatoes, baked/boiled/mashed         | 0.03        | 0.02            | 1.03         | (0.99, 1.07) | 0.10          | 1.17 | 1.75E-01 | 0.559 |
| Nutrient | Daidzein                              | -0.03       | 0.02            | 0.97         | (0.93, 1.01) | 0.65          | 1.08 | 1.77E-01 | 0.559 |
| Nutrient | Maltose                               | 0.03        | 0.02            | 1.03         | (0.99, 1.08) | 0.70          | 1.65 | 1.78E-01 | 0.559 |
| Nutrient | Total MUFA                            | 0.04        | 0.03            | 1.04         | (0.98, 1.11) | 0.54          | 2.88 | 1.78E-01 | 0.559 |
| Nutrient | Lycopene                              | 0.03        | 0.02            | 1.03         | (0.99, 1.07) | 0.20          | 1.26 | 1.82E-01 | 0.564 |
| Nutrient | Dietary copper                        | 0.04        | 0.03            | 1.04         | (0.98, 1.10) | 0.15          | 2.57 | 1.84E-01 | 0.564 |
| Food     | Orange juice                          | -0.03       | 0.02            | 0.97         | (0.94, 1.01) | 0.98          | 1.06 | 1.88E-01 | 0.566 |
| Nutrient | Delphinidin                           | -0.03       | 0.02            | 0.97         | (0.94, 1.01) | 0.55          | 1.09 | 1.88E-01 | 0.566 |
| Nutrient | Sulfur from cysteine                  | 0.04        | 0.03            | 1.04         | (0.98, 1.09) | 0.82          | 2.20 | 1.89E-01 | 0.566 |
| Nutrient | Proline                               | 0.05        | 0.03            | 1.05         | (0.98, 1.12) | 0.60          | 3.54 | 1.90E-01 | 0.566 |
| Nutrient | Petunidin                             | -0.03       | 0.02            | 0.97         | (0.94, 1.01) | 0.57          | 1.09 | 1.94E-01 | 0.570 |
| Nutrient | Vegetable protein                     | 0.04        | 0.03            | 1.04         | (0.98, 1.09) | 0.92          | 2.26 | 2.07E-01 | 0.592 |
| Nutrient | Dietary iron                          | -0.03       | 0.03            | 0.97         | (0.92, 1.02) | 0.00          | 2.08 | 2.08E-01 | 0.592 |
| Nutrient | Total iron                            | -0.03       | 0.02            | 0.97         | (0.93, 1.02) | 0.03          | 1.45 | 2.14E-01 | 0.595 |
| Food     | Tomato juice or V-8                   | 0.02        | 0.02            | 1.02         | (0.99, 1.06) | 0.18          | 1.03 | 2.15E-01 | 0.595 |
| Nutrient | Dietary thiamine                      | -0.04       | 0.03            | 0.96         | (0.90, 1.02) | 0.00          | 2.80 | 2.15E-01 | 0.595 |
| Nutrient | Glucosiberin                          | 0.02        | 0.02            | 1.02         | (0.99, 1.07) | 0.05          | 1.09 | 2.16E-01 | 0.595 |
| Nutrient | Sum of betaine and choline            | 0.04        | 0.03            | 1.04         | (0.98, 1.11) | 0.77          | 3.10 | 2.19E-01 | 0.597 |
| Nutrient | Naringenin                            | -0.02       | 0.02            | 0.98         | (0.94, 1.02) | 0.64          | 1.11 | 2.25E-01 | 0.606 |
| Nutrient | Acrylamide                            | -0.03       | 0.02            | 0.97         | (0.93, 1.02) | 0.42          | 1.42 | 2.27E-01 | 0.607 |
| Food     | Decaffeinated coffee                  | -0.02       | 0.02            | 0.98         | (0.94, 1.01) | 0.23          | 1.00 | 2.33E-01 | 0.615 |
| Nutrient | Added sugar                           | 0.03        | 0.02            | 1.03         | (0.98, 1.08) | 0.55          | 1.67 | 2.54E-01 | 0.648 |
| Food     | Cream                                 | 0.02        | 0.02            | 1.02         | (0.98, 1.06) | 0.44          | 1.04 | 2.60E-01 | 0.652 |
| Food     | Yellow squash                         | 0.02        | 0.02            | 1.02         | (0.98, 1.06) | 0.27          | 1.04 | 2.60E-01 | 0.652 |
| Food     | Cooked onions                         | 0.02        | 0.02            | 1.02         | (0.98, 1.06) | 0.90          | 1.04 | 2.65E-01 | 0.657 |
| Food     | Corn                                  | 0.02        | 0.02            | 1.02         | (0.98, 1.06) | 0.40          | 1.08 | 2.69E-01 | 0.658 |
| Nutrient | Myricetin                             | -0.02       | 0.02            | 0.98         | (0.94, 1.02) | 0.44          | 1.12 | 2.69E-01 | 0.658 |
| Nutrient | 6'7'-Dihydroxybergamottin             | 0.02        | 0.02            | 1.02         | (0.98, 1.06) | 0.00          | 1.07 | 2.74E-01 | 0.661 |
| Nutrient | Carbohydrate from refined grain       | 0.03        | 0.03            | 1.03         | (0.98, 1.08) | 0.46          | 1.74 | 2.76E-01 | 0.661 |
| Food     | Pancakes or waffles                   | 0.02        | 0.02            | 1.02         | (0.98, 1.06) | 0.62          | 1.07 | 2.77E-01 | 0.661 |
| Food     | Beer                                  | -0.02       | 0.02            | 0.98         | (0.94, 1.02) | 0.48          | 1.03 | 2.84E-01 | 0.668 |
| Nutrient | Oleic acid                            | 0.03        | 0.03            | 1.03         | (0.97, 1.10) | 0.63          | 2.78 | 2.85E-01 | 0.668 |
| Nutrient | Bergamottin                           | 0.02        | 0.02            | 1.02         | (0.98, 1.06) | 0.00          | 1.07 | 2.87E-01 | 0.668 |
| Food     | Ice cream                             | 0.02        | 0.02            | 1.02         | (0.98, 1.06) | 0.28          | 1.07 | 3.00E-01 | 0.683 |
| Nutrient | Total dietary omega 3 (no alpha 18:3) | -0.02       | 0.02            | 0.98         | (0.94, 1.02) | 0.65          | 1.13 | 3.01E-01 | 0.683 |
| Nutrient | Dietary pyridoxine                    | -0.03       | 0.03            | 0.97         | (0.92, 1.03) | 0.12          | 2.15 | 3.03E-01 | 0.684 |
| Nutrient | Dietary long chain fatty acid         | -0.02       | 0.02            | 0.98         | (0.94, 1.02) | 0.71          | 1.14 | 3.05E-01 | 0.684 |
| Nutrient | Dietary beta carotene                 | -0.02       | 0.02            | 0.98         | (0.94, 1.02) | 0.15          | 1.26 | 3.10E-01 | 0.688 |
| Nutrient | Glucobervirin                         | 0.02        | 0.02            | 1.02         | (0.98, 1.06) | 0.08          | 1.06 | 3.16E-01 | 0.694 |
| Nutrient | Total free choline                    | -0.03       | 0.03            | 0.97         | (0.92, 1.03) | 0.32          | 2.37 | 3.22E-01 | 0.698 |
| Nutrient | Starch                                | -0.03       | 0.03            | 0.97         | (0.92, 1.03) | 0.12          | 2.21 | 3.22E-01 | 0.698 |
| Nutrient | Carbohydrate from legumes             | 0.02        | 0.02            | 1.02         | (0.98, 1.06) | 0.05          | 1.24 | 3.26E-01 | 0.700 |
| Nutrient | Proanthocyanidin, dimers              | -0.02       | 0.02            | 0.98         | (0.94, 1.02) | 0.85          | 1.25 | 3.28E-01 | 0.700 |

Supplementary Table 4. cont.

| Type     | Exposure                           | Effect size | SE(effect size) | Hazard ratio | 95% CI       | P-value of PH | VIF  | P-value  | FDR   |
|----------|------------------------------------|-------------|-----------------|--------------|--------------|---------------|------|----------|-------|
| Nutrient | Vegetable fiber                    | 0.02        | 0.02            | 1.02         | (0.98, 1.07) | 0.03          | 1.34 | 3.32E-01 | 0.702 |
| Food     | Wholegrain bread                   | -0.02       | 0.02            | 0.98         | (0.95, 1.02) | 0.18          | 1.07 | 3.38E-01 | 0.708 |
| Nutrient | Bergapten                          | 0.02        | 0.02            | 1.02         | (0.98, 1.06) | 0.44          | 1.09 | 3.51E-01 | 0.717 |
| Nutrient | Alpha carotene                     | -0.02       | 0.02            | 0.98         | (0.94, 1.02) | 0.08          | 1.16 | 3.53E-01 | 0.717 |
| Nutrient | Glycitein                          | -0.02       | 0.02            | 0.98         | (0.94, 1.02) | 0.09          | 1.06 | 3.54E-01 | 0.717 |
| Nutrient | Dietary zinc                       | 0.03        | 0.03            | 1.03         | (0.97, 1.09) | 0.34          | 2.48 | 3.54E-01 | 0.717 |
| Nutrient | Delta tocotrienol                  | -0.02       | 0.02            | 0.98         | (0.94, 1.02) | 0.76          | 1.14 | 3.55E-01 | 0.717 |
| Food     | Jams, jellies                      | -0.02       | 0.02            | 0.98         | (0.95, 1.02) | 0.70          | 1.10 | 3.58E-01 | 0.718 |
| Food     | Raw spinach                        | -0.02       | 0.02            | 0.98         | (0.94, 1.02) | 0.87          | 1.05 | 3.61E-01 | 0.718 |
| Food     | Candy without chocolate            | -0.02       | 0.02            | 0.98         | (0.95, 1.02) | 0.70          | 1.04 | 3.62E-01 | 0.718 |
| Food     | Tomatoes                           | -0.02       | 0.02            | 0.98         | (0.95, 1.02) | 0.38          | 1.07 | 3.65E-01 | 0.719 |
| Nutrient | Total furocoumarins                | 0.02        | 0.02            | 1.02         | (0.98, 1.06) | 0.00          | 1.07 | 3.70E-01 | 0.723 |
| Food     | Potato chips or corn chips         | 0.02        | 0.02            | 1.02         | (0.98, 1.06) | 0.27          | 1.11 | 3.74E-01 | 0.726 |
| Food     | Mixed vegetables                   | 0.02        | 0.02            | 1.02         | (0.98, 1.06) | 0.03          | 1.07 | 3.76E-01 | 0.726 |
| Nutrient | Caprylic acid                      | 0.02        | 0.02            | 1.02         | (0.98, 1.06) | 0.18          | 1.31 | 3.81E-01 | 0.729 |
| Nutrient | Gluten                             | -0.02       | 0.02            | 0.98         | (0.93, 1.03) | 0.36          | 1.66 | 3.83E-01 | 0.729 |
| Food     | Cake                               | 0.02        | 0.02            | 1.02         | (0.98, 1.06) | 0.26          | 1.13 | 3.85E-01 | 0.729 |
| Food     | banana                             | -0.02       | 0.02            | 0.98         | (0.95, 1.02) | 0.55          | 1.09 | 3.89E-01 | 0.731 |
| Nutrient | Glutamine                          | 0.03        | 0.04            | 1.03         | (0.96, 1.11) | 0.54          | 4.19 | 3.91E-01 | 0.732 |
| Food     | Yams or sweet potatoes             | -0.02       | 0.02            | 0.98         | (0.95, 1.02) | 0.14          | 1.07 | 4.00E-01 | 0.740 |
| Food     | Tofu or soybeans                   | -0.02       | 0.02            | 0.98         | (0.94, 1.03) | 0.01          | 1.03 | 4.27E-01 | 0.768 |
| Food     | Blueberries                        | -0.02       | 0.02            | 0.98         | (0.94, 1.02) | 0.59          | 1.05 | 4.27E-01 | 0.768 |
| Nutrient | Natural vitamin B6                 | 0.02        | 0.03            | 1.02         | (0.96, 1.09) | 0.22          | 2.71 | 4.32E-01 | 0.771 |
| Food     | Grapefruit and juice               | 0.02        | 0.02            | 1.02         | (0.98, 1.06) | 0.01          | 1.05 | 4.39E-01 | 0.775 |
| Food     | Salsa                              | -0.02       | 0.02            | 0.98         | (0.94, 1.03) | 0.73          | 1.04 | 4.40E-01 | 0.775 |
| Food     | Popcorn                            | -0.02       | 0.02            | 0.98         | (0.94, 1.03) | 0.41          | 1.09 | 4.50E-01 | 0.785 |
| Nutrient | Dietary vitamin C                  | -0.02       | 0.02            | 0.98         | (0.94, 1.03) | 0.12          | 1.39 | 4.55E-01 | 0.787 |
| Food     | Kale                               | -0.02       | 0.02            | 0.98         | (0.95, 1.03) | 0.51          | 1.04 | 4.58E-01 | 0.787 |
| Food     | Other fruit juices                 | 0.01        | 0.02            | 1.01         | (0.98, 1.05) | 0.29          | 1.05 | 4.62E-01 | 0.787 |
| Nutrient | Proanthocyanidin, trimers          | -0.02       | 0.02            | 0.98         | (0.94, 1.03) | 0.64          | 1.41 | 4.62E-01 | 0.787 |
| Nutrient | Formononetin                       | -0.01       | 0.02            | 0.99         | (0.95, 1.03) | 0.73          | 1.09 | 4.65E-01 | 0.787 |
| Nutrient | Fructose                           | 0.02        | 0.02            | 1.02         | (0.97, 1.07) | 0.32          | 1.67 | 4.67E-01 | 0.787 |
| Food     | Chicken/turkey, without skin       | 0.01        | 0.02            | 1.01         | (0.98, 1.05) | 0.67          | 1.05 | 4.76E-01 | 0.795 |
| Food     | Beans or lentils                   | 0.01        | 0.02            | 1.01         | (0.98, 1.05) | 0.67          | 1.08 | 4.82E-01 | 0.799 |
| Nutrient | Choline from phosphocholine        | 0.02        | 0.02            | 1.02         | (0.97, 1.07) | 0.65          | 1.74 | 4.85E-01 | 0.799 |
| Nutrient | 22:5 fatty acid                    | 0.01        | 0.02            | 1.01         | (0.97, 1.06) | 0.84          | 1.09 | 4.88E-01 | 0.800 |
| Food     | Skim milk                          | 0.01        | 0.02            | 1.01         | (0.98, 1.05) | 0.43          | 1.05 | 4.93E-01 | 0.803 |
| Nutrient | EPA fatty acid                     | -0.01       | 0.02            | 0.99         | (0.95, 1.03) | 0.43          | 1.06 | 4.97E-01 | 0.803 |
| Nutrient | Total flavonoids                   | -0.01       | 0.02            | 0.99         | (0.95, 1.03) | 0.55          | 1.18 | 4.98E-01 | 0.803 |
| Nutrient | Choline derivative betaine         | -0.02       | 0.02            | 0.98         | (0.94, 1.03) | 0.01          | 1.68 | 5.07E-01 | 0.807 |
| Food     | Eggplant, zucchini, summer squash  | -0.01       | 0.02            | 0.99         | (0.95, 1.03) | 0.95          | 1.05 | 5.07E-01 | 0.807 |
| Nutrient | Napoleiferin                       | -0.01       | 0.02            | 0.99         | (0.95, 1.03) | 0.01          | 1.07 | 5.15E-01 | 0.810 |
| Nutrient | Total long chain fatty acid        | -0.01       | 0.02            | 0.99         | (0.95, 1.03) | 0.64          | 1.09 | 5.17E-01 | 0.810 |
| Food     | Egg                                | 0.01        | 0.02            | 1.01         | (0.97, 1.05) | 0.07          | 1.08 | 5.21E-01 | 0.810 |
| Nutrient | Kaempferol                         | -0.01       | 0.02            | 0.99         | (0.95, 1.03) | 0.71          | 1.10 | 5.21E-01 | 0.810 |
| Nutrient | Bergaptol                          | 0.01        | 0.02            | 1.01         | (0.97, 1.05) | 0.01          | 1.06 | 5.24E-01 | 0.810 |
| Nutrient | Epicatechin                        | 0.01        | 0.02            | 1.01         | (0.97, 1.05) | 0.56          | 1.19 | 5.25E-01 | 0.810 |
| Nutrient | Lactose                            | -0.01       | 0.02            | 0.99         | (0.95, 1.03) | 0.60          | 1.20 | 5.32E-01 | 0.811 |
| Nutrient | Lutein and zeaxanthin              | -0.01       | 0.02            | 0.99         | (0.95, 1.03) | 0.43          | 1.23 | 5.33E-01 | 0.811 |
| Food     | Peanut butter                      | -0.01       | 0.02            | 0.99         | (0.95, 1.03) | 0.42          | 1.07 | 5.35E-01 | 0.811 |
| Food     | Chocolate bars                     | 0.01        | 0.02            | 1.01         | (0.97, 1.05) | 0.78          | 1.07 | 5.39E-01 | 0.811 |
| Food     | Onions as a garnish                | -0.01       | 0.02            | 0.99         | (0.95, 1.03) | 0.35          | 1.05 | 5.39E-01 | 0.811 |
| Nutrient | Omega 3 (20:5+22:6, no alpha 18:3) | -0.01       | 0.02            | 0.99         | (0.95, 1.03) | 0.63          | 1.09 | 5.48E-01 | 0.815 |
| Nutrient | Glucorucin                         | -0.01       | 0.02            | 0.99         | (0.95, 1.03) | 0.04          | 1.04 | 5.49E-01 | 0.815 |
| Nutrient | Gamma tocopherol                   | -0.02       | 0.03            | 0.98         | (0.94, 1.04) | 0.92          | 1.96 | 5.51E-01 | 0.815 |
| Nutrient | Dietary niacin                     | -0.02       | 0.03            | 0.98         | (0.93, 1.04) | 0.13          | 2.50 | 5.63E-01 | 0.823 |
| Nutrient | Proanthocyanidin, monomers         | -0.01       | 0.02            | 0.99         | (0.95, 1.03) | 0.46          | 1.14 | 5.65E-01 | 0.823 |
| Nutrient | Biochanin A                        | -0.01       | 0.02            | 0.99         | (0.95, 1.03) | 0.85          | 1.10 | 5.67E-01 | 0.823 |
| Food     | Celery                             | 0.01        | 0.02            | 1.01         | (0.97, 1.05) | 0.98          | 1.06 | 5.72E-01 | 0.824 |
| Nutrient | Oxalate                            | -0.01       | 0.02            | 0.99         | (0.94, 1.03) | 0.34          | 1.38 | 5.73E-01 | 0.824 |

Supplementary Table 4. cont.

| Type     | Exposure                                         | Effect size | SE(effect size) | Hazard ratio | 95% CI       | P-value of PH | VIF  | P-value  | FDR   |
|----------|--------------------------------------------------|-------------|-----------------|--------------|--------------|---------------|------|----------|-------|
| Nutrient | Total sugar                                      | 0.02        | 0.03            | 1.02         | (0.96, 1.08) | 0.94          | 2.36 | 5.78E-01 | 0.824 |
| Food     | Non-dairy coffee whitener                        | 0.01        | 0.02            | 1.01         | (0.97, 1.05) | 0.08          | 1.01 | 5.79E-01 | 0.824 |
| Nutrient | Dietary betaine                                  | -0.01       | 0.02            | 0.99         | (0.94, 1.03) | 0.01          | 1.68 | 5.86E-01 | 0.828 |
| Nutrient | Flavonoids (no proanthocyanidins)                | -0.01       | 0.02            | 0.99         | (0.95, 1.03) | 0.38          | 1.11 | 5.88E-01 | 0.828 |
| Nutrient | Natural sugar                                    | -0.01       | 0.02            | 0.99         | (0.94, 1.04) | 0.96          | 1.68 | 5.96E-01 | 0.833 |
| Food     | Cooked carrot                                    | 0.01        | 0.02            | 1.01         | (0.97, 1.05) | 0.25          | 1.06 | 6.00E-01 | 0.835 |
| Food     | Cooked spinach                                   | 0.01        | 0.02            | 1.01         | (0.97, 1.05) | 0.66          | 1.04 | 6.05E-01 | 0.837 |
| Food     | Other cooked cereal                              | -0.01       | 0.02            | 0.99         | (0.95, 1.03) | 0.37          | 1.02 | 6.11E-01 | 0.840 |
| Nutrient | Dietary phyloquinone vitamin K1                  | 0.01        | 0.02            | 1.01         | (0.97, 1.05) | 0.08          | 1.28 | 6.34E-01 | 0.858 |
| Nutrient | Alpha linolenic                                  | -0.01       | 0.03            | 0.99         | (0.94, 1.04) | 0.16          | 1.81 | 6.35E-01 | 0.858 |
| Nutrient | DHA fatty acid                                   | -0.01       | 0.02            | 0.99         | (0.95, 1.03) | 0.99          | 1.10 | 6.40E-01 | 0.861 |
| Food     | Strawberries                                     | 0.01        | 0.02            | 1.01         | (0.97, 1.05) | 0.74          | 1.05 | 6.52E-01 | 0.870 |
| Nutrient | Fiber from cruciferous veg                       | -0.01       | 0.02            | 0.99         | (0.95, 1.03) | 0.12          | 1.12 | 6.57E-01 | 0.872 |
| Nutrient | Glycosolated B6                                  | -0.01       | 0.02            | 0.99         | (0.94, 1.04) | 0.00          | 1.68 | 6.60E-01 | 0.872 |
| Food     | Other cheese                                     | 0.01        | 0.02            | 1.01         | (0.97, 1.05) | 0.20          | 1.09 | 6.68E-01 | 0.877 |
| Nutrient | Dairy vitamin D                                  | 0.01        | 0.02            | 1.01         | (0.97, 1.05) | 0.21          | 1.15 | 6.77E-01 | 0.883 |
| Food     | Green/red peppers                                | 0.01        | 0.02            | 1.01         | (0.97, 1.05) | 0.82          | 1.05 | 6.80E-01 | 0.883 |
| Nutrient | 4-Hydroxyglucobrassicin                          | -0.01       | 0.02            | 0.99         | (0.95, 1.03) | 0.01          | 1.08 | 6.98E-01 | 0.897 |
| Nutrient | Dietary vitamin D                                | -0.01       | 0.02            | 0.99         | (0.95, 1.03) | 0.24          | 1.29 | 7.03E-01 | 0.899 |
| Nutrient | Linolenic acid                                   | 0.01        | 0.03            | 1.01         | (0.96, 1.06) | 0.23          | 1.96 | 7.30E-01 | 0.922 |
| Food     | Shrimp, lobster, scallops                        | 0.01        | 0.02            | 1.01         | (0.97, 1.05) | 0.51          | 1.05 | 7.41E-01 | 0.926 |
| Nutrient | Dietary potassium                                | -0.01       | 0.03            | 0.99         | (0.93, 1.05) | 0.87          | 2.97 | 7.42E-01 | 0.926 |
| Food     | Tomato sauce                                     | 0.01        | 0.02            | 1.01         | (0.97, 1.05) | 0.93          | 1.15 | 7.45E-01 | 0.927 |
| Food     | Canned tuna                                      | -0.01       | 0.02            | 0.99         | (0.95, 1.03) | 0.47          | 1.08 | 7.50E-01 | 0.928 |
| Nutrient | Eriodictyol                                      | -0.01       | 0.02            | 0.99         | (0.96, 1.03) | 0.96          | 1.08 | 7.56E-01 | 0.929 |
| Nutrient | Sugar from fruit juice                           | -0.01       | 0.02            | 0.99         | (0.96, 1.03) | 0.91          | 1.11 | 7.58E-01 | 0.929 |
| Nutrient | Total flavan-3-ols                               | -0.01       | 0.02            | 0.99         | (0.96, 1.03) | 0.77          | 1.10 | 7.60E-01 | 0.929 |
| Food     | White rice                                       | -0.01       | 0.02            | 0.99         | (0.95, 1.04) | 0.04          | 1.13 | 7.63E-01 | 0.929 |
| Nutrient | Total phosphorous                                | -0.01       | 0.03            | 0.99         | (0.93, 1.06) | 0.73          | 3.22 | 7.71E-01 | 0.933 |
| Food     | Cottage ricotta cheese                           | 0.01        | 0.02            | 1.01         | (0.97, 1.04) | 0.30          | 1.04 | 7.92E-01 | 0.947 |
| Food     | Cauliflower                                      | 0.01        | 0.02            | 1.01         | (0.97, 1.04) | 0.09          | 1.05 | 7.93E-01 | 0.947 |
| Nutrient | Phylloquinone vitamin K1                         | 0.01        | 0.02            | 1.01         | (0.96, 1.05) | 0.12          | 1.28 | 8.06E-01 | 0.951 |
| Nutrient | Glucanasturtiin                                  | 0.00        | 0.02            | 1.00         | (0.96, 1.03) | 0.01          | 1.05 | 8.13E-01 | 0.951 |
| Food     | Pizza                                            | 0.00        | 0.02            | 1.01         | (0.96, 1.05) | 0.33          | 1.17 | 8.15E-01 | 0.951 |
| Nutrient | Dietary alpha tocopherol                         | -0.01       | 0.03            | 0.99         | (0.94, 1.05) | 0.31          | 2.00 | 8.22E-01 | 0.951 |
| Food     | Crackers                                         | 0.00        | 0.02            | 1.00         | (0.97, 1.04) | 0.47          | 1.08 | 8.23E-01 | 0.951 |
| Food     | Tea                                              | 0.00        | 0.02            | 1.00         | (0.96, 1.03) | 0.33          | 1.02 | 8.24E-01 | 0.951 |
| Nutrient | Thearubigins                                     | 0.00        | 0.02            | 1.00         | (0.96, 1.03) | 0.79          | 1.04 | 8.31E-01 | 0.951 |
| Nutrient | Epigallocatechin                                 | 0.00        | 0.02            | 1.00         | (0.96, 1.03) | 0.83          | 1.05 | 8.32E-01 | 0.951 |
| Nutrient | Total omega 3                                    | 0.01        | 0.03            | 1.01         | (0.96, 1.06) | 0.20          | 1.71 | 8.36E-01 | 0.951 |
| Food     | Brown rice                                       | 0.00        | 0.02            | 1.00         | (0.96, 1.05) | 0.75          | 1.04 | 8.36E-01 | 0.951 |
| Nutrient | Sucrose                                          | 0.01        | 0.03            | 1.01         | (0.96, 1.06) | 0.72          | 1.90 | 8.37E-01 | 0.951 |
| Nutrient | Glucose                                          | 0.01        | 0.03            | 1.01         | (0.96, 1.06) | 0.36          | 1.80 | 8.38E-01 | 0.951 |
| Nutrient | Dairy calcium                                    | 0.00        | 0.02            | 1.00         | (0.95, 1.04) | 0.39          | 1.31 | 8.39E-01 | 0.951 |
| Nutrient | 4-Methoxyglucobrassicin                          | 0.00        | 0.02            | 1.00         | (0.97, 1.04) | 0.02          | 1.09 | 8.51E-01 | 0.958 |
| Food     | Low caff beverages                               | 0.00        | 0.02            | 1.00         | (0.96, 1.04) | 0.00          | 1.10 | 8.63E-01 | 0.966 |
| Nutrient | Carbohydrates                                    | -0.01       | 0.04            | 0.99         | (0.92, 1.08) | 0.25          | 4.62 | 8.78E-01 | 0.976 |
| Nutrient | Dairy protein                                    | 0.00        | 0.02            | 1.00         | (0.96, 1.04) | 0.52          | 1.34 | 8.93E-01 | 0.986 |
| Nutrient | Total retinol                                    | 0.00        | 0.02            | 1.00         | (0.96, 1.04) | 0.90          | 1.34 | 9.09E-01 | 0.988 |
| Nutrient | Dietary calcium                                  | 0.00        | 0.02            | 1.00         | (0.95, 1.05) | 0.63          | 1.72 | 9.11E-01 | 0.988 |
| Nutrient | Glucoraphenin                                    | 0.00        | 0.02            | 1.00         | (0.97, 1.04) | 0.05          | 1.02 | 9.14E-01 | 0.988 |
| Nutrient | Theaflavin                                       | 0.00        | 0.02            | 1.00         | (0.96, 1.04) | 0.75          | 1.03 | 9.14E-01 | 0.988 |
| Nutrient | Cystine                                          | 0.00        | 0.03            | 1.00         | (0.94, 1.06) | 0.32          | 2.95 | 9.23E-01 | 0.988 |
| Nutrient | Dietary phosphorous                              | 0.00        | 0.03            | 1.00         | (0.94, 1.07) | 0.79          | 3.29 | 9.29E-01 | 0.988 |
| Food     | Cantaloupe                                       | 0.00        | 0.02            | 1.00         | (0.96, 1.04) | 0.19          | 1.03 | 9.34E-01 | 0.988 |
| Nutrient | Total theaflavins and polymers proanthocyanidins | 0.00        | 0.02            | 1.00         | (0.96, 1.04) | 0.91          | 1.14 | 9.38E-01 | 0.988 |
| Nutrient | Total potassium                                  | 0.00        | 0.03            | 1.00         | (0.94, 1.07) | 0.99          | 2.83 | 9.38E-01 | 0.988 |
| Food     | Mayo                                             | 0.00        | 0.02            | 1.00         | (0.96, 1.04) | 0.97          | 1.11 | 9.39E-01 | 0.988 |
| Nutrient | Total folate                                     | 0.00        | 0.02            | 1.00         | (0.95, 1.05) | 0.04          | 1.50 | 9.40E-01 | 0.988 |
| Nutrient | Dietary omega 6 (no gamma 18:3)                  | 0.00        | 0.03            | 1.00         | (0.95, 1.06) | 0.24          | 2.25 | 9.40E-01 | 0.988 |

Supplementary Table 4. cont.

| Type     | Exposure                           | Effect size | SE(effect size) | Hazard ratio | 95% CI       | P-value of PH | VIF  | P-value  | FDR   |
|----------|------------------------------------|-------------|-----------------|--------------|--------------|---------------|------|----------|-------|
| Nutrient | Pelargonidin                       | 0.00        | 0.02            | 1.00         | (0.96, 1.04) | 0.69          | 1.07 | 9.43E-01 | 0.988 |
| Nutrient | Dietary free choline               | 0.00        | 0.03            | 1.00         | (0.94, 1.07) | 0.25          | 2.73 | 9.50E-01 | 0.988 |
| Nutrient | Total glucosinolates               | 0.00        | 0.02            | 1.00         | (0.96, 1.04) | 0.01          | 1.10 | 9.50E-01 | 0.988 |
| Nutrient | Total dietary omega 3              | 0.00        | 0.03            | 1.00         | (0.95, 1.05) | 0.07          | 1.86 | 9.56E-01 | 0.988 |
| Nutrient | Epicatechin 3-gallate              | 0.00        | 0.02            | 1.00         | (0.96, 1.04) | 0.81          | 1.03 | 9.58E-01 | 0.988 |
| Nutrient | Glucobrassicin                     | 0.00        | 0.02            | 1.00         | (0.96, 1.04) | 0.02          | 1.09 | 9.64E-01 | 0.988 |
| Food     | Cabbage                            | 0.00        | 0.02            | 1.00         | (0.96, 1.04) | 0.95          | 1.06 | 9.66E-01 | 0.988 |
| Food     | English muffins/bagels/rolls       | 0.00        | 0.02            | 1.00         | (0.96, 1.04) | 0.53          | 1.09 | 9.67E-01 | 0.988 |
| Nutrient | Dietary vitamin A                  | 0.00        | 0.02            | 1.00         | (0.96, 1.04) | 0.03          | 1.30 | 9.71E-01 | 0.988 |
| Nutrient | Total polyunsaturated fat          | 0.00        | 0.03            | 1.00         | (0.95, 1.06) | 0.51          | 2.28 | 9.72E-01 | 0.988 |
| Nutrient | Nitrate                            | 0.00        | 0.02            | 1.00         | (0.96, 1.04) | 0.06          | 1.22 | 9.74E-01 | 0.988 |
| Nutrient | Gallocatechin                      | 0.00        | 0.02            | 1.00         | (0.96, 1.04) | 0.65          | 1.03 | 9.82E-01 | 0.991 |
| Nutrient | Choline from glycerophosphocholine | 0.00        | 0.02            | 1.00         | (0.95, 1.05) | 0.46          | 1.60 | 9.90E-01 | 0.993 |
| Nutrient | Linoleic acid                      | 0.00        | 0.03            | 1.00         | (0.95, 1.06) | 0.67          | 2.21 | 9.91E-01 | 0.993 |

Supplementary Table 5: **Validation in NHS II.** From 54 statistically significant exposures found in NHS, 38 were validated in NHS II. P-values are associated with two-sided Wald tests.

| Type     | Exposure                             | Effect size | SE(effect size) | Hazard ratio | 95% CI       | P-value of PH | VIF  | p-value  |
|----------|--------------------------------------|-------------|-----------------|--------------|--------------|---------------|------|----------|
| Nutrient | Cereal fiber                         | -0.28       | 0.06            | 0.75         | (0.68, 0.84) | 0.7           | 1.62 | 2.70E-07 |
| Nutrient | Total manganese                      | -0.28       | 0.06            | 0.76         | (0.68, 0.85) | 0.32          | 1.68 | 5.82E-07 |
| Nutrient | Alcohol                              | -0.21       | 0.04            | 0.81         | (0.74, 0.88) | 0.3           | 1.12 | 1.06E-06 |
| Nutrient | Beta tocotrienol                     | -0.25       | 0.05            | 0.78         | (0.70, 0.86) | 0.56          | 1.39 | 1.92E-06 |
| Nutrient | Alpha tocotrienol                    | -0.25       | 0.05            | 0.78         | (0.70, 0.87) | 0.84          | 1.52 | 3.64E-06 |
| Nutrient | Dietary manganese                    | -0.28       | 0.06            | 0.76         | (0.68, 0.85) | 0.74          | 1.96 | 3.72E-06 |
| Nutrient | Added Bran from wheat, rice, ...     | -0.21       | 0.05            | 0.81         | (0.74, 0.89) | 0.79          | 1.13 | 5.86E-06 |
| Food     | Cold breakfast cereal                | -0.2        | 0.05            | 0.82         | (0.74, 0.89) | 0.16          | 1.11 | 1.18E-05 |
| Nutrient | Dietary folate                       | -0.25       | 0.06            | 0.78         | (0.69, 0.88) | 0.08          | 2.03 | 3.50E-05 |
| Nutrient | Natural bran                         | -0.2        | 0.05            | 0.82         | (0.75, 0.90) | 0.73          | 1.25 | 3.62E-05 |
| Nutrient | Carb from milled wholegrain          | -0.2        | 0.05            | 0.82         | (0.75, 0.90) | 0.69          | 1.26 | 3.90E-05 |
| Nutrient | Stearic acid                         | 0.28        | 0.07            | 1.32         | (1.15, 1.51) | 0.45          | 2.64 | 6.26E-05 |
| Nutrient | Carb from wholegrain                 | -0.19       | 0.05            | 0.83         | (0.75, 0.91) | 1             | 1.28 | 6.47E-05 |
| Food     | Salad/oil and vinegar dressing       | -0.16       | 0.05            | 0.85         | (0.78, 0.93) | 0.15          | 1.17 | 3.41E-04 |
| Food     | Raw carrots                          | -0.17       | 0.05            | 0.84         | (0.77, 0.93) | 0.93          | 1.14 | 4.02E-04 |
| Food     | Red wine                             | -0.18       | 0.05            | 0.84         | (0.76, 0.93) | 0.72          | 1.07 | 7.00E-04 |
| Nutrient | Phytate                              | -0.21       | 0.06            | 0.81         | (0.71, 0.92) | 0.34          | 2.18 | 9.66E-04 |
| Nutrient | Beta tocopherol                      | -0.21       | 0.06            | 0.81         | (0.71, 0.92) | 0.9           | 2.08 | 1.01E-03 |
| Nutrient | Apigenin                             | -0.15       | 0.04            | 0.86         | (0.79, 0.94) | 0.86          | 1.2  | 1.07E-03 |
| Nutrient | Supplemental or fortified folic acid | -0.17       | 0.05            | 0.85         | (0.77, 0.94) | 0.03          | 1.41 | 1.38E-03 |
| Nutrient | Discretionary solid fat              | 0.21        | 0.07            | 1.23         | (1.08, 1.41) | 0.72          | 2.46 | 1.49E-03 |
| Nutrient | Natural germ                         | -0.14       | 0.05            | 0.87         | (0.79, 0.95) | 0.18          | 1.27 | 2.42E-03 |
| Nutrient | Total saturated fat                  | 0.22        | 0.07            | 1.25         | (1.08, 1.44) | 0.65          | 3.04 | 2.88E-03 |
| Nutrient | Trans 16:1                           | 0.17        | 0.06            | 1.19         | (1.06, 1.33) | 0.47          | 2.06 | 3.27E-03 |
| Nutrient | Palmitic acid                        | 0.23        | 0.08            | 1.25         | (1.08, 1.46) | 0.94          | 3.31 | 3.47E-03 |
| Food     | Beverages with sugar                 | 0.12        | 0.04            | 1.12         | (1.04, 1.22) | 0.29          | 1.11 | 4.38E-03 |
| Food     | White wine                           | -0.14       | 0.05            | 0.87         | (0.79, 0.96) | 0.83          | 1.07 | 4.40E-03 |
| Nutrient | Synthetic vitamin B6                 | -0.13       | 0.05            | 0.88         | (0.80, 0.96) | 0.16          | 1.08 | 4.92E-03 |
| Nutrient | Trans 18:1                           | 0.15        | 0.06            | 1.16         | (1.04, 1.29) | 0.17          | 1.71 | 7.17E-03 |
| Nutrient | Supplemental selenium                | -0.12       | 0.05            | 0.89         | (0.81, 0.97) | 0.09          | 1.28 | 7.41E-03 |
| Nutrient | Palmitoleic acid                     | 0.16        | 0.06            | 1.18         | (1.04, 1.33) | 0.77          | 2.19 | 9.24E-03 |
| Nutrient | Animal fat                           | 0.16        | 0.06            | 1.18         | (1.04, 1.33) | 0.97          | 2.23 | 1.03E-02 |
| Nutrient | Animal MUFA                          | 0.15        | 0.06            | 1.16         | (1.03, 1.31) | 0.67          | 2.03 | 1.18E-02 |
| Food     | Hotdog                               | 0.12        | 0.05            | 1.12         | (1.03, 1.23) | 0.75          | 1.1  | 1.18E-02 |
| Food     | Raisins or grapes                    | -0.12       | 0.05            | 0.89         | (0.80, 0.98) | 0.28          | 1.08 | 1.90E-02 |
| Nutrient | Hydroxyproline                       | 0.12        | 0.05            | 1.12         | (1.01, 1.25) | 0.15          | 1.55 | 3.22E-02 |
| Food     | Yogurt                               | -0.09       | 0.05            | 0.91         | (0.83, 1.00) | 0.14          | 1.1  | 3.95E-02 |
| Nutrient | Isorhamnetin                         | -0.08       | 0.04            | 0.92         | (0.84, 1.00) | 0.95          | 1.14 | 5.90E-02 |
| Nutrient | Heme iron                            | 0.10        | 0.05            | 1.10         | (0.99, 1.22) | 0.35          | 1.53 | 6.91E-02 |
| Nutrient | Dietary tocopherols                  | -0.12       | 0.07            | 0.89         | (0.77, 1.02) | 0.50          | 2.81 | 8.60E-02 |
| Nutrient | Discretionary liquid fat             | -0.08       | 0.05            | 0.92         | (0.83, 1.02) | 0.91          | 1.63 | 1.17E-01 |
| Nutrient | Myristic acid                        | 0.07        | 0.06            | 1.07         | (0.96, 1.20) | 0.67          | 1.98 | 2.23E-01 |
| Food     | Liquor                               | -0.05       | 0.04            | 0.95         | (0.88, 1.03) | 0.83          | 1.02 | 2.27E-01 |
| Nutrient | Sodium                               | -0.09       | 0.08            | 0.91         | (0.78, 1.07) | 1.00          | 3.97 | 2.48E-01 |
| Food     | Peanuts                              | -0.03       | 0.04            | 0.97         | (0.89, 1.05) | 0.75          | 1.08 | 4.33E-01 |
| Nutrient | Cholesterol                          | 0.05        | 0.06            | 1.05         | (0.93, 1.18) | 0.71          | 2.02 | 4.34E-01 |
| Nutrient | Plant MUFA                           | -0.04       | 0.06            | 0.96         | (0.86, 1.08) | 0.65          | 2.03 | 4.96E-01 |
| Food     | All processed meats                  | 0.02        | 0.04            | 1.02         | (0.94, 1.11) | 0.50          | 1.12 | 6.27E-01 |
| Food     | Doughnuts                            | 0.02        | 0.04            | 1.02         | (0.94, 1.10) | 0.03          | 1.06 | 6.52E-01 |
| Food     | Apple juice or cider                 | 0.02        | 0.04            | 1.02         | (0.93, 1.11) | 0.43          | 1.06 | 6.87E-01 |
| Nutrient | Trans 18:2                           | -0.02       | 0.05            | 0.98         | (0.88, 1.09) | 0.53          | 1.74 | 7.64E-01 |
| Food     | Hamburger                            | 0.01        | 0.04            | 1.01         | (0.93, 1.10) | 0.93          | 1.20 | 7.74E-01 |
| Food     | White bread                          | -0.01       | 0.04            | 0.99         | (0.91, 1.08) | 0.01          | 1.11 | 7.80E-01 |



Supplementary Table 6: **Hazard Ratios of CHD by quintiles of intakes of each exposure, with first quintile as baseline.** To help interpret our findings, we calculated the HR of each quintile of exposure intake compared with the first quintile, as a reference group. For example, for isorhamnetin, the HR for Q2 (the second quintile of consumption) compared to Q1 (the first quintile of consumption) is 0.94. The HR for Q3 and Q4 compared to Q1 are 0.88 and 0.82, respectively. The HR for Q5 (which is the maximum level of isorhamnetin consumption) is 0.73, compared to Q1. This decreasing trend illustrates the protective association of isorhamnetin with CHD.

| Type     | Exposure                               | Hazard ratio | Q1 (20%) | Q2 (40%) | Q3 (60%) | Q4 (80%) | Q5 (100%) |
|----------|----------------------------------------|--------------|----------|----------|----------|----------|-----------|
| Nutrient | Alcohol                                | 0.88         | 1        | 0.90     | 0.82     | 0.74     | 0.63      |
| Nutrient | Added bran from wheat, rice, oat, corn | 0.87         | 1        | 0.89     | 0.81     | 0.75     | 0.57      |
| Nutrient | Trans 16:1                             | 1.19         | 1        | 1.09     | 1.19     | 1.32     | 3.31      |
| Nutrient | Discretionary liquid fat               | 0.86         | 1        | 0.92     | 0.85     | 0.78     | 0.38      |
| Nutrient | Animal MUFA                            | 1.17         | 1        | 1.09     | 1.18     | 1.30     | 2.84      |
| Nutrient | Discretionary solid fat                | 1.18         | 1        | 1.10     | 1.20     | 1.32     | 2.75      |
| Food     | White wine                             | 0.89         | 1        | 0.99     | 0.93     | 0.85     | 0.58      |
| Nutrient | Palmitoleic acid                       | 1.17         | 1        | 1.10     | 1.19     | 1.31     | 2.45      |
| Nutrient | Animal fat                             | 1.17         | 1        | 1.09     | 1.18     | 1.29     | 2.73      |
| Food     | Salad/oil and vinegar dressing         | 0.90         | 1        | 0.94     | 0.87     | 0.82     | 0.67      |
| Food     | Yogurt                                 | 0.90         | 1        | 0.97     | 0.92     | 0.83     | 0.59      |
| Nutrient | Phytate                                | 0.88         | 1        | 0.93     | 0.87     | 0.81     | 0.33      |
| Nutrient | Stearic acid                           | 1.16         | 1        | 1.09     | 1.17     | 1.28     | 2.31      |
| Nutrient | Carbohydrate from milled wholegrain    | 0.91         | 1        | 0.93     | 0.88     | 0.83     | 0.55      |
| Nutrient | Sodium                                 | 1.14         | 1        | 1.08     | 1.15     | 1.24     | 2.12      |
| Food     | Raw carrots                            | 0.91         | 1        | 0.97     | 0.91     | 0.83     | 0.68      |
| Nutrient | Total saturated fat                    | 1.16         | 1        | 1.09     | 1.17     | 1.28     | 2.44      |
| Nutrient | Hydroxyproline                         | 1.12         | 1        | 1.06     | 1.12     | 1.20     | 1.91      |
| Nutrient | Isorhamnetin                           | 0.91         | 1        | 0.94     | 0.88     | 0.82     | 0.73      |
| Food     | Liquor                                 | 0.92         | 1        | 1.00     | 0.99     | 0.92     | 0.71      |
| Nutrient | Carbohydrate from wholegrain           | 0.91         | 1        | 0.94     | 0.90     | 0.85     | 0.51      |
| Nutrient | Cereal fiber                           | 0.91         | 1        | 0.94     | 0.90     | 0.85     | 0.37      |
| Food     | Red wine                               | 0.91         | 1        | 1.00     | 0.98     | 0.93     | 0.56      |
| Nutrient | Trans 18:2                             | 1.12         | 1        | 1.06     | 1.12     | 1.20     | 1.83      |
| Nutrient | Dietary tocopherols                    | 0.88         | 1        | 0.93     | 0.87     | 0.81     | 0.34      |
| Nutrient | Palmitic acid                          | 1.15         | 1        | 1.08     | 1.16     | 1.26     | 2.22      |
| Nutrient | Dietary folate                         | 0.90         | 1        | 0.94     | 0.89     | 0.84     | 0.38      |
| Food     | Doughnuts                              | 1.08         | 1        | 1.02     | 1.06     | 1.09     | 1.90      |
| Nutrient | Beta tocotrienol                       | 0.92         | 1        | 0.95     | 0.90     | 0.85     | 0.71      |
| Nutrient | Plant MUFA                             | 0.90         | 1        | 0.94     | 0.89     | 0.84     | 0.48      |
| Food     | Hotdog                                 | 1.07         | 1        | 1.05     | 1.09     | 1.13     | 1.97      |
| Food     | White bread                            | 1.08         | 1        | 1.04     | 1.12     | 1.17     | 1.26      |
| Nutrient | Natural germ                           | 0.92         | 1        | 0.94     | 0.91     | 0.86     | 0.65      |
| Nutrient | Apigenin                               | 0.92         | 1        | 0.96     | 0.92     | 0.87     | 0.74      |
| Nutrient | Beta tocopherol                        | 0.91         | 1        | 0.95     | 0.90     | 0.85     | 0.49      |
| Nutrient | Natural bran                           | 0.92         | 1        | 0.95     | 0.91     | 0.87     | 0.60      |
| Nutrient | Supplemental selenium                  | 0.92         | 1        | 1.00     | 0.95     | 0.85     | 0.81      |
| Food     | Apple juice or cider                   | 1.07         | 1        | 1.00     | 1.03     | 1.06     | 1.60      |
| Nutrient | Dietary manganese                      | 0.91         | 1        | 0.95     | 0.90     | 0.85     | 0.57      |
| Food     | Peanuts                                | 0.93         | 1        | 0.98     | 0.95     | 0.91     | 0.60      |
| Nutrient | Alpha tocotrienol                      | 0.92         | 1        | 0.95     | 0.91     | 0.86     | 0.67      |
| Nutrient | Myristic acid                          | 1.10         | 1        | 1.06     | 1.10     | 1.16     | 1.66      |
| Nutrient | Cholesterol                            | 1.10         | 1        | 1.05     | 1.10     | 1.16     | 2.19      |
| Nutrient | Supplemental or fortified folic acid   | 0.92         | 1        | 0.94     | 0.89     | 0.85     | 0.59      |
| Food     | All processed meats                    | 1.07         | 1        | 1.04     | 1.06     | 1.11     | 1.51      |
| Nutrient | Trans 18:1                             | 1.09         | 1        | 1.06     | 1.11     | 1.17     | 1.58      |
| Nutrient | Total manganese                        | 0.92         | 1        | 0.95     | 0.91     | 0.88     | 0.69      |
| Food     | Hamburger                              | 1.07         | 1        | 1.03     | 1.06     | 1.09     | 1.57      |
| Food     | Beverages with sugar                   | 1.07         | 1        | 1.02     | 1.06     | 1.13     | 1.29      |
| Nutrient | Synthetic vitamin B6                   | 0.94         | 1        | 0.97     | 0.92     | 0.88     | 0.73      |
| Food     | Cold breakfast cereal                  | 0.94         | 1        | 0.95     | 0.91     | 0.88     | 0.74      |
| Food     | Raisins or grapes                      | 0.93         | 1        | 0.96     | 0.95     | 0.89     | 0.67      |
| Nutrient | Heme iron                              | 1.08         | 1        | 1.04     | 1.08     | 1.14     | 1.85      |

**Supplementary Table 7: EWAS Results for Polyphenols.** Polyphenols are a large family of phytochemicals with great chemical diversity, known to be bioactive compounds of foods, species, medicinal plants and nutraceuticals, with various positive health effects [28]. In our analysis, we covered a wide range of polyphenols. Among 44 polyphenol-related exposures, 17 were found to be significantly associated with lower CHD risk meeting a 0.05 threshold P-value. However, only isorhamnetin and apigenin remained significant after correcting for multiple testing (HR < 0.92; P-value <  $2 \times 10^{-4}$ ), in line with [29,30]. P-values are associated with two-sided Wald tests.

| Exposure                                        | Effect size | SE(effect size) | Hazard ratio | 95% CI       | P-value of PH | VIF  | P-value  | FDR      |
|-------------------------------------------------|-------------|-----------------|--------------|--------------|---------------|------|----------|----------|
| Isorhamnetin                                    | -0.09       | 0.02            | 0.91         | (0.87, 0.95) | 0.32          | 1.27 | 1.59E-05 | 6.11E-03 |
| Apigenin                                        | -0.08       | 0.02            | 0.92         | (0.89, 0.96) | 0.81          | 1.15 | 1.79E-04 | 2.02E-02 |
| Total flavones                                  | -0.06       | 0.02            | 0.94         | (0.90, 0.98) | 0.63          | 1.23 | 3.81E-03 | 9.63E-02 |
| Total isoflavones                               | -0.06       | 0.02            | 0.95         | (0.91, 0.99) | 0.58          | 1.14 | 8.57E-03 | 1.38E-01 |
| Quercetin                                       | -0.05       | 0.02            | 0.95         | (0.91, 0.99) | 0.68          | 1.27 | 1.22E-02 | 1.69E-01 |
| Hesperetin                                      | -0.05       | 0.02            | 0.95         | (0.92, 0.99) | 0.62          | 1.13 | 1.31E-02 | 1.75E-01 |
| Proanthocyanidin, 7-10mers                      | -0.05       | 0.02            | 0.95         | (0.91, 0.99) | 0.97          | 1.28 | 2.00E-02 | 2.15E-01 |
| Total flavanones                                | -0.05       | 0.02            | 0.95         | (0.92, 0.99) | 0.97          | 1.14 | 2.15E-02 | 2.18E-01 |
| Total flavonols                                 | -0.05       | 0.02            | 0.95         | (0.91, 0.99) | 0.68          | 1.22 | 2.51E-02 | 2.20E-01 |
| Genistein                                       | -0.05       | 0.02            | 0.95         | (0.91, 0.99) | 0.4           | 1.1  | 2.59E-02 | 2.23E-01 |
| Proanthocyanidin, 4-6mers                       | -0.05       | 0.02            | 0.95         | (0.91, 0.99) | 0.84          | 1.34 | 2.84E-02 | 2.31E-01 |
| Naringenin                                      | -0.04       | 0.02            | 0.96         | (0.92, 1.00) | 0.5           | 1.12 | 3.32E-02 | 2.49E-01 |
| Malvidin                                        | -0.04       | 0.02            | 0.96         | (0.92, 1.00) | 0.18          | 1.12 | 3.48E-02 | 2.54E-01 |
| Proanthocyanidin, polymers                      | -0.05       | 0.02            | 0.96         | (0.92, 1.00) | 0.62          | 1.27 | 3.48E-02 | 2.54E-01 |
| Glycitein                                       | -0.05       | 0.02            | 0.96         | (0.91, 1.00) | 0.08          | 1.05 | 4.19E-02 | 2.73E-01 |
| Isoflavones (no biochanin A or formononetin)    | -0.04       | 0.02            | 0.96         | (0.92, 1.00) | 0.54          | 1.11 | 4.65E-02 | 2.79E-01 |
| Luteolin                                        | -0.04       | 0.02            | 0.96         | (0.92, 1.00) | 0.83          | 1.2  | 4.85E-02 | 2.81E-01 |
| Daidzein                                        | -0.04       | 0.02            | 0.96         | (0.92, 1.00) | 0.41          | 1.07 | 5.91E-02 | 3.03E-01 |
| Proanthocyanidin, dimers                        | -0.04       | 0.02            | 0.96         | (0.92, 1.00) | 0.89          | 1.24 | 7.43E-02 | 3.29E-01 |
| Proanthocyanidin, trimers                       | -0.04       | 0.02            | 0.96         | (0.92, 1.01) | 0.72          | 1.44 | 1.17E-01 | 3.99E-01 |
| Proanthocyanidin, monomers                      | -0.03       | 0.02            | 0.97         | (0.93, 1.01) | 0.89          | 1.12 | 1.56E-01 | 4.37E-01 |
| Total anthocyanidins                            | -0.03       | 0.02            | 0.97         | (0.93, 1.01) | 0.51          | 1.17 | 1.72E-01 | 4.51E-01 |
| Peonidin                                        | -0.03       | 0.02            | 0.97         | (0.94, 1.01) | 0.26          | 1.11 | 1.95E-01 | 4.78E-01 |
| Myricetin                                       | -0.02       | 0.02            | 0.98         | (0.94, 1.02) | 0.67          | 1.1  | 2.36E-01 | 5.32E-01 |
| Formononetin                                    | -0.02       | 0.02            | 0.98         | (0.94, 1.02) | 0.73          | 1.12 | 2.50E-01 | 5.45E-01 |
| Thearubigins                                    | -0.02       | 0.02            | 0.98         | (0.94, 1.02) | 0.88          | 1.03 | 2.53E-01 | 5.46E-01 |
| Pelargonidin                                    | -0.02       | 0.02            | 0.98         | (0.94, 1.02) | 0.66          | 1.09 | 2.72E-01 | 5.61E-01 |
| Petunidin                                       | -0.02       | 0.02            | 0.98         | (0.94, 1.02) | 0.48          | 1.1  | 2.76E-01 | 5.65E-01 |
| Lutein and zeaxanthin                           | -0.02       | 0.02            | 0.98         | (0.94, 1.02) | 0.05          | 1.23 | 2.95E-01 | 5.79E-01 |
| Total flavonoids                                | -0.02       | 0.02            | 0.98         | (0.94, 1.02) | 0.97          | 1.16 | 3.10E-01 | 5.87E-01 |
| Delphinidin                                     | -0.02       | 0.02            | 0.98         | (0.94, 1.02) | 0.49          | 1.1  | 3.32E-01 | 5.95E-01 |
| Kaempferol                                      | -0.02       | 0.02            | 0.98         | (0.94, 1.02) | 0.28          | 1.08 | 3.33E-01 | 5.95E-01 |
| Eriodictyol                                     | -0.02       | 0.02            | 0.98         | (0.95, 1.02) | 0.69          | 1.09 | 3.37E-01 | 5.95E-01 |
| Catechin                                        | -0.02       | 0.02            | 0.98         | (0.94, 1.02) | 0.86          | 1.2  | 3.63E-01 | 6.11E-01 |
| Total theaflavins and polymers proanthocyanidis | -0.02       | 0.02            | 0.98         | (0.94, 1.02) | 0.82          | 1.12 | 3.93E-01 | 6.35E-01 |
| Flavonoids (no proanthocyanidins)               | -0.02       | 0.02            | 0.98         | (0.95, 1.02) | 0.9           | 1.09 | 4.05E-01 | 6.42E-01 |
| Epigallocatechin                                | -0.01       | 0.02            | 0.99         | (0.95, 1.02) | 0.95          | 1.04 | 4.46E-01 | 6.81E-01 |
| Biochanin A                                     | -0.01       | 0.02            | 0.99         | (0.95, 1.03) | 0.74          | 1.13 | 5.03E-01 | 7.22E-01 |
| Epicatechin 3-gallate                           | -0.01       | 0.02            | 0.99         | (0.95, 1.03) | 0.98          | 1.03 | 5.20E-01 | 7.24E-01 |
| Total flavan-3-ols                              | -0.01       | 0.02            | 0.99         | (0.95, 1.03) | 0.83          | 1.08 | 5.20E-01 | 7.24E-01 |
| Gallocatechin                                   | -0.01       | 0.02            | 0.99         | (0.95, 1.03) | 0.98          | 1.02 | 6.29E-01 | 7.78E-01 |
| Cyanidin                                        | -0.01       | 0.02            | 0.99         | (0.95, 1.03) | 0.41          | 1.21 | 6.80E-01 | 8.10E-01 |
| Theaflavin                                      | -0.01       | 0.02            | 0.99         | (0.95, 1.03) | 0.98          | 1.02 | 6.80E-01 | 8.10E-01 |
| Epicatechin                                     | 0           | 0.02            | 1            | (0.96, 1.04) | 0.89          | 1.19 | 8.93E-01 | 9.40E-01 |

## 2 Supplementary Figures

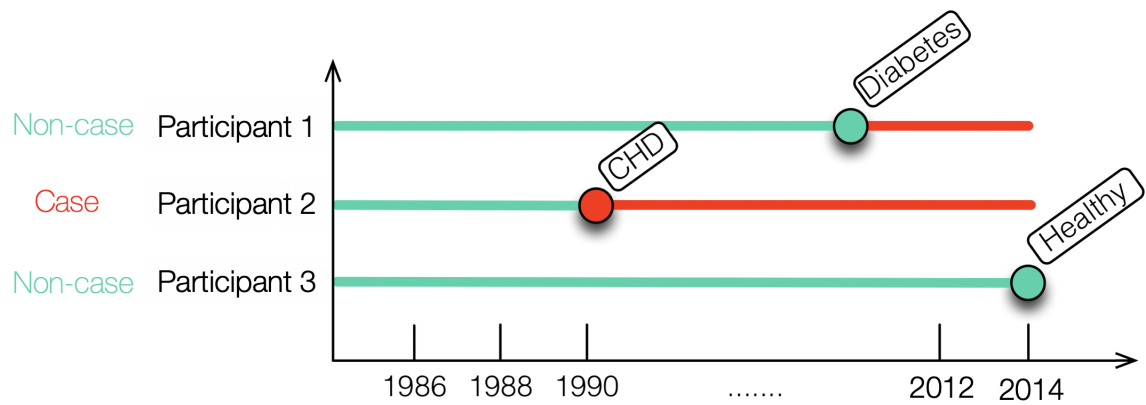

Supplementary Figure 1: **Participant Selection.** All participants were healthy in 1986. Participant 1 was healthy up to 2008 and then developed Diabetes. Her dietary data used in the analysis from 1986 to 2008 (non-case). Participant 2 developed CHD in 1990. Her dietary data was used in the analysis from 1986 to 1990 (case). Participant 3 did not develop any disease up to 2014 (non-case).

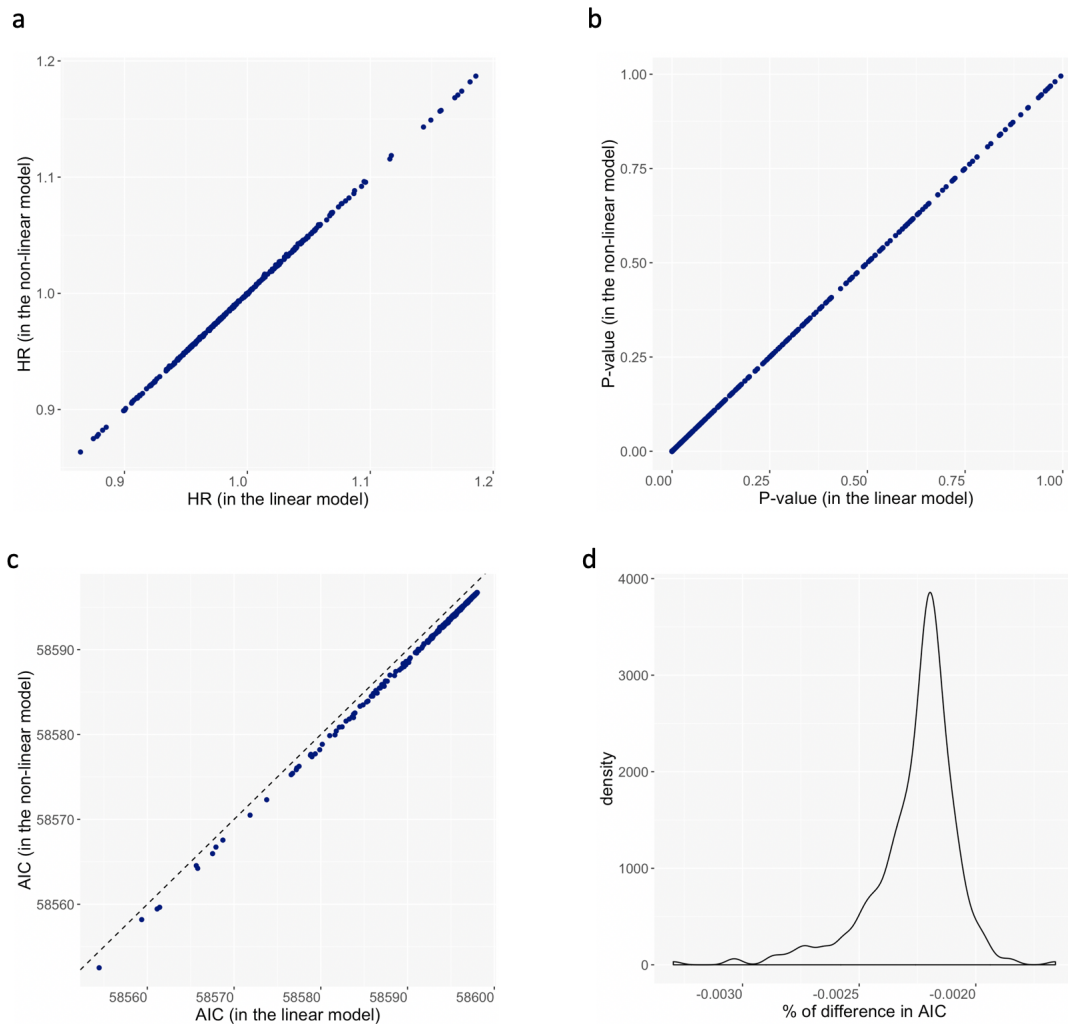

**Supplementary Figure 2:** Comparing the linear model with the non-linear model where a spline of degree four for age is included. In Supplementary Figure 2-a and 2-b, we compared the hazard ratios and P-values from the linear model with the non-linear model where we included a spline of degree four for age. In both cases, we see that they define a straight line of unit slope, implying that two models are almost identical in terms of the estimated hazard ratios and P-values. In Supplementary Figure 2-c, we plotted the AIC obtained from each version of the model. The AIC from non-linear models is only slightly smaller than the AIC of linear models. In Supplementary Figure 2-d, we report the distribution of the percentage of the difference between AIC in the two modeling frameworks. We found that the average of the percentage of the difference in AIC is -0.00225, with a very small variance. Therefore, the change in AIC is not sufficiently large to choose the non-linear model over the linear model, and add to the complexity of the analysis, which results in a significantly higher run-time for each analysis and each iteration of the permutation process. Source data are provided in Source Data - Supplementary Figure 2.xlsx.

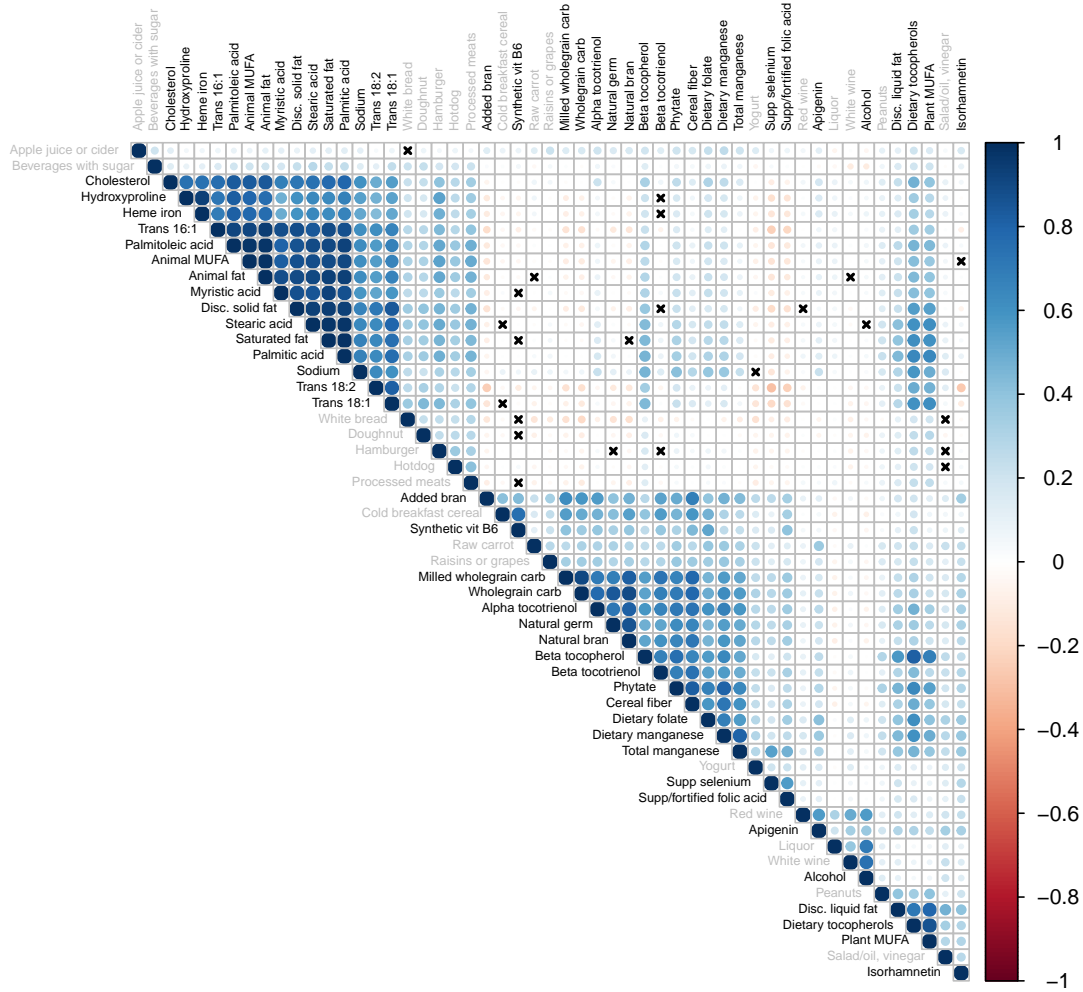

Supplementary Figure 3: **Correlation Matrix.** We looked at the Spearman correlation between 53 significant associations found in NHS. We calculated 1,378 pairwise correlations. Similar to [27], we used a permutation-based approach to estimate the two-sided P-value of significance for each pair of correlations. Given a pair of  $X$  and  $Y$ , we shuffled values of  $X$  and computed the correlation with  $Y$ , repeating this procedure for all pairs. The P-value for a correlation was the fraction of correlations from the permuted dataset with greater absolute value (equation 1). Next, we control for multiple testing using the Benjamini-Hochberg step-down approach.

$$P - value_{x,y} = \sum_{i=1}^{1378} I(|\rho_{x,y}| < |\tilde{\rho}_i|) / 1378 \quad (1)$$

We show the resulting correlation in a correlation matrix, where non-significant correlations are indicated with a cross. Nutrients are color-coded with black labels and food items are color-coded with gray. Source data are provided in Source Data - Supplementary Figure 3.xlsx.

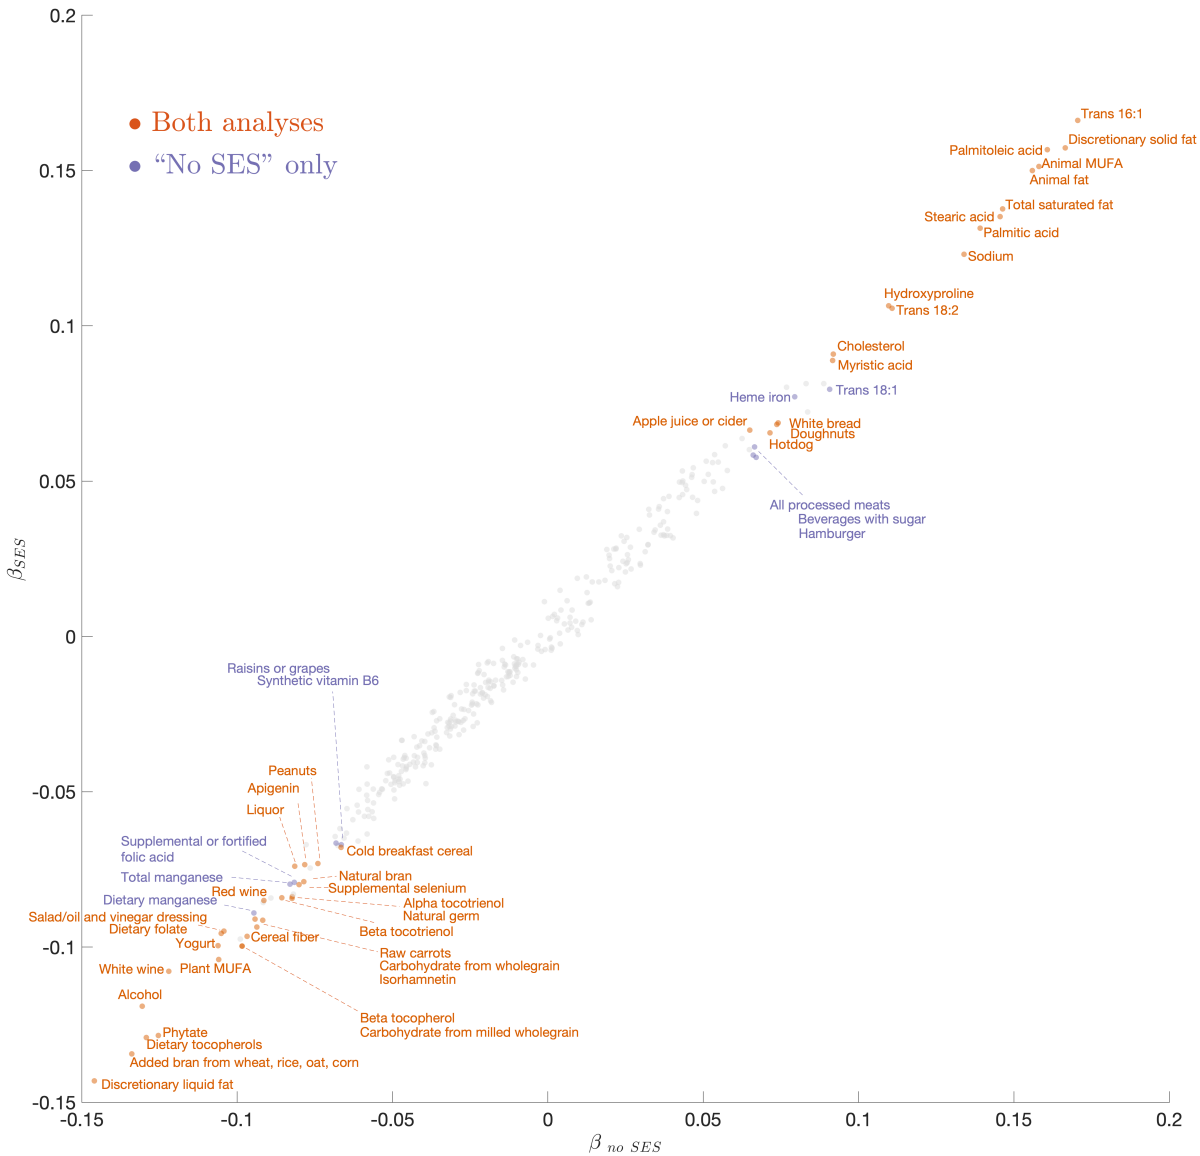

Supplementary Figure 4: **Relation between the original coefficients ( $\beta_{no\ SES}$ ) and those estimated by including census tract family median income ( $\beta_{SES}$ ).** The study population in NHS comprises all registered nurses with a relatively high homogeneity in educational attainment and socioeconomic status. Nevertheless, we investigated the role of SES by including census tract family median income in our analysis [31, 32]. Given the zip-code of each individual in time we were able to associate the median income of families living in that area [33]. The results are consistent with our previous analysis, confirming 43 out of 53 significant exposures originally found without SES, with only the marginal associations being affected by the additional correction. We show the relationship between the original coefficients ( $\beta_{no\ SES}$ ) and those estimated considering SES ( $\beta_{SES}$ ). The observed linearity proves that the two analyses are consistent over the whole panel of nutrients and foods. Indeed, the exposures are ranked in a similar fashion according to the estimated p-value, with a Spearman correlation coefficient equal to 0.9733. Their agreement further improves when the exposures with the strongest signals are taken into account (orange). The 10 exposures whose significance is affected by SES (purple) were among the weakest of the previous analysis ( $\beta_{no\ SES} \rightarrow 0$ ). Despite the marginal effect on the significance of dietary exposures, SES strongly influences CHD outcomes, with an estimated hazard ratio across the 347 exposures in NHS1 fluctuating in the narrow range,  $0.9035 \pm 0.0017$  (see Supplementary Figure 5). Source data are provided in Source Data - Supplementary Figure 4.xlsx.

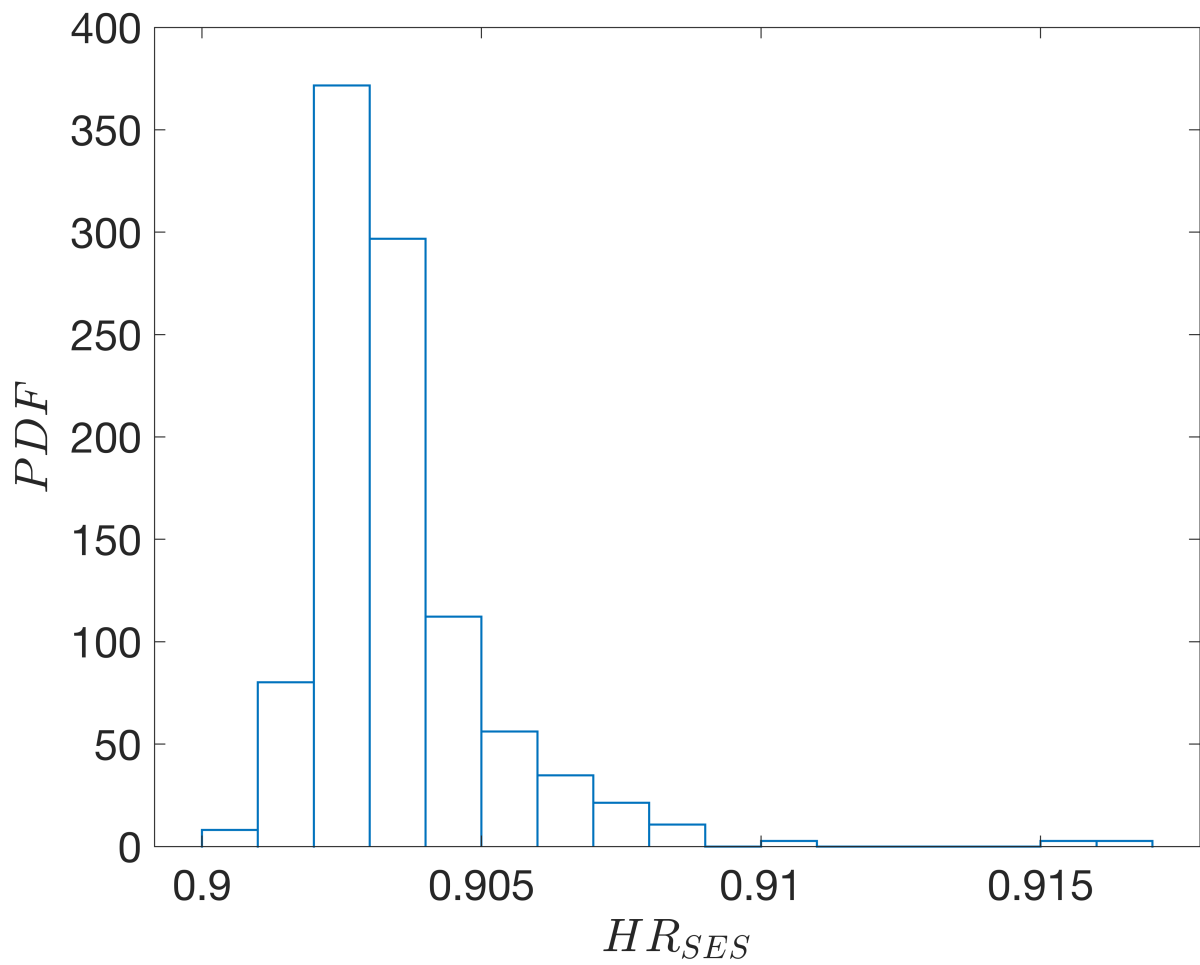

Supplementary Figure 5: **Estimation of the hazard ratio ( $HR_{SES}$ ) associated with the census tract family median income.** For each exposure in NHS I we collected  $HR_{SES}$ . SES is negatively associated with CHD risk, minimally varying across the 347 exposures. Source data are provided in Source Data - Supplementary Figure 5.xlsx.

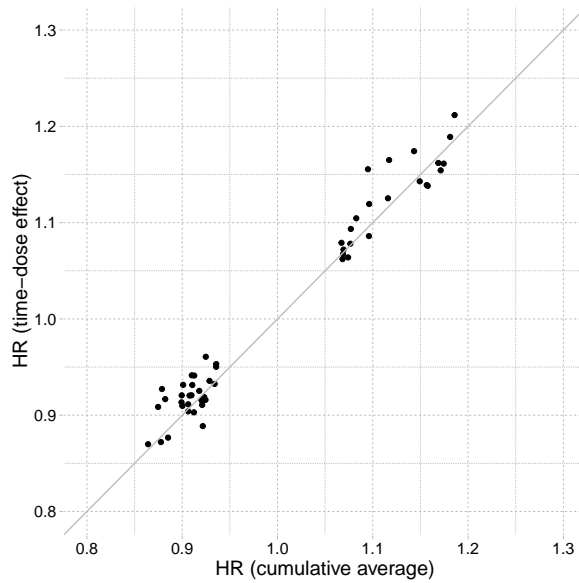

Supplementary Figure 6: **The estimated Hazard Ratio using cumulative averages versus time-dose effects.** We implemented another approach to explore the associations between dietary factors and CHD risk. Instead of using the cumulative average of the food intakes from baseline to the start of each 2-year follow-up interval (which represents the long-term usual intake and reduces the random within-person variation), we investigated the time-dose effect of the dietary exposures, the so-called “latest-diet”. We show the results of our analysis on the time-dose effect in Supplementary Table 4. After using the permutation procedure to account for multiple testing, we found 29 significant associations, including 6 food items and 23 nutrients. There are 28 common exposures among the original analysis and the time-dose effect analysis. In the latter, the PH assumption is violated for three exposures (the p-value for the PH assumption test is less than 0.05). The hazard ratios (HRs) obtained using the cumulative averages is consistent with HRs calculated with time-dose effect (Spearman Correlation 0.65), and the directionality for exposures that have been already found statistically significant in our original analysis is conserved. Overall, the time-dose effect analysis yielded weaker associations between dietary exposures and CHD risk. Source data are provided in Source Data - Supplementary Figure 6.xlsx.



### **3 Supplementary Methods**

#### **3.1 Participant Selection**

From 121,527 participants in NHS, we excluded 47,949 from the analysis who dropped out from the study before 1986, whose reported average energy intake was less than 600 or more than 3,500 kcal/day, who left more than 70 questions in the FFQ unanswered, or whose demographic data at baseline were missing. Moreover, 3,652 participants with a history of cardiovascular disease (CVD), 2,255 with diabetes mellitus, and 4,860 with cancer in the baseline year were excluded from the analysis. During the follow-up period, 14,832 individuals developed cancer, 8,111 developed diabetes mellitus, and 8,573 developed other cardiovascular diseases such as stroke (overall 25,965 participants) for whom we stopped updating the dietary records. The average number of follow-up years for non-case and case individuals were 26 and 16 years, respectively.

In NHS II, from 116,429 participants, 21,181 were excluded if their reported average energy intake was less than 600 or more than 3,500 kcal/day, they left more than 70 questions in the FFQ unanswered, or their demographic data at baseline were missing. In addition, 903 participants with a history of cardiovascular disease (CVD), 922 with diabetes mellitus, and 2,562 with cancer in the baseline year were excluded. During the follow-up period, 15,734 individuals developed cancer, 6,518 developed diabetes mellitus, and 3,318 developed other cardiovascular diseases such as stroke (overall 23,250 participants) for whom we stopped updating the dietary records. The average number of follow-up years for non-case and case individuals were 22 and 14 years, respectively.

Our ascertainment of CHD follows the guidelines offered by WHO and has been applied in other cohorts as well, such as such as the Women’s Health Initiative (WHI) Study [1], the Atherosclerosis Risk in Communities (ARIC) Study [2], and PREDIMED [3]. While our definition is one of the most used in the literature, other less stringent criteria were used in other cohorts, such as EPIC [4], Jackson Heart and Framingham Offspring Cohort Studies [5].

#### **3.2 Cumulative Average of Dietary Exposures**

The use of cumulative average measurements takes advantage of all prior data and helps reduce random within-person variation, and thus offers a statistically more powerful test of an association of cumulative exposure [6]. The use of the cumulative average model to examine the association between disease incidence and repeated measurements of exposures in cohort studies can be dated back to the 1960s [7], and has been used by many researchers [8–13].

It has also been shown that analyses using cumulative averages to reflect the dietary records yield stronger associations than those using either only baseline diet or most recent diet [14]. In [14], a study analyzing the association between dietary fat and CHD, Hu, et al., argued that observing stronger associations might be due to the fact that the use of the cumulative averages reduces measurement error from intraindividual variations over time. It is also possible that the cumulative averages, which reflect long-term diet, are more relevant etiologically than either the most remote (baseline) or the most recent diets.

### 3.3 Multiple Testing

Since in EWAS we are conducting multiple tests, we need to control the number of false positives to extract the truly significant associations. In the GWAS setting, Bonferroni correction is utilized which controls for Type I errors, guaranteeing the family-wide error rate. The Bonferroni corrected p-value is computed by dividing the original significance threshold  $\alpha$  by the number of tests conducted on the dependent variable. The corrected p-value will be used to reject a null hypothesis. This method assumes all tests are independent of each other which is not always the case. Having correlated tests, the Bonferroni threshold would be too conservative and results in high rate of false negatives, in turn, losing the power of detection [15]. To eliminate the assumption of independence among tests, one can use the number of *effective* tests in Bonferroni adjustment, usually determined by principal component analysis [16–18]. However, by applying both approaches to our results we find the same 31 tests to be statistically significant with a threshold of 0.05.

An alternative approach is to control the false discovery rate (FDR) which is the proportion of significant results that are actually false positives. FDR-controlling methods, such as Benjamini-Hochberg, are less conservative compared to FWER procedures. Therefore, they have more power of detection, at the cost of higher Type I error [19, 20]. The Benjamini-Hochberg procedure also assumes that the individual tests are independent of each other. We also utilized this procedure, finding 81 tests to be statistically significant, controlling for 0.05 FDR. Other more complicated techniques, such as [21], have been developed for controlling FDR that may be more appropriate when the independence assumption is violated.

Estimating the FDR through permutations of the dependent variable is preferred in the scenario in which the variables are correlated [22–24]. In the EWAS context that the independence assumption hardly meets, we compute an empirical estimate of the FDR derived through permutations of the phenotype multiple times, effectively creating a null distribution of test statistics. Since the estimate of the FDR utilizes the data itself, it inherently considers the

correlated structure of the data [23–25], an important quality given the dense correlation of environmental factors. The FDR is the ratio of the proportion of results that were called significant at a given level  $\alpha$  in the null distribution and the proportion of results called significant from our real tests.

Here, we discuss the procedure we used to create a distribution of P-values. Sampling from an unbiased urn follows a central hyper-geometric distribution. In our study, since the confounding effect of adjusting variables exists, certain subjects have greater odds of developing CHD than other subjects. Sampling from such population resembles sampling from a biased urn which follows a non-central hyper-geometric distribution. In our permutation scheme, we maintain the confounding role of adjusting variables even though the association between exposures and the disease is broken [26]. We use Cox regression to estimate the probability of the developing CHD for each subject at each time. Further, we permute the disease status according to the estimated probabilities. Assume  $N_0$  is the number of non-case subjects and  $N_1$  is the number of case subjects.  $D_j$  is a binary variable denoting the disease status of subject  $j$ .  $\hat{\theta}_j$  indicates the estimated CHD odd for subject  $j$ . For permutation  $k$ ,

$$r_k = (r_{k1}, r_{k2}, \dots, r_{kN})^T \quad (2)$$

$r_k$  follows a multivariate hyper-geometric distribution. We can sample  $r_k$  by using Fisher’s non-central hyper-geometric distribution with non-centrality parameter  $\hat{\theta} = (\hat{\theta}_1, \hat{\theta}_2, \dots, \hat{\theta}_N)$ . While such sampling is computationally expensive, we simplify the sampling process. We generate a uniform random number and compare it with a spectrum of cumulative CHD odds and assign CHD to each subject accordingly. We continue generating random numbers until  $N_1$  subjects are picked. Next, we re-run the analysis and collect null P-values 1000 times.

Assuming that the number of tests is  $i$  and the number of permutations is  $j$ , the raw FDR is the ratio of raw number of results that exceed that p-value threshold in the permuted data and the number of results that exceed that p-value among real p-values.

| pval <sub>real</sub><br>(sorted) | pval <sub>permuted</sub> |           |           |       |           | FDR <sub>raw</sub> | FDR   |
|----------------------------------|--------------------------|-----------|-----------|-------|-----------|--------------------|-------|
|                                  | 1                        | 2         | 3         | ..... | <i>j</i>  |                    |       |
| $P_1$                            | $p_{1,1}$                | $p_{1,2}$ | $p_{1,3}$ | ..... | $p_{1,j}$ | $r_1$              | $f_1$ |
| $P_2$                            | .                        | .         | .         | .     | .         | $r_2$              | $f_2$ |
| .                                | .                        | .         | .         | .     | .         | .                  | .     |
| .                                | .                        | .         | .         | .     | .         | .                  | .     |
| $P_i$                            | $p_{i,1}$                | .         | .         | ..... | $p_{i,j}$ | $r_i$              | $f_i$ |

FDR Calculation

The raw FDR is calculated using equation (3).

$$r_{i'} = \frac{[I(p_{i',1} < P_{i'}) + \dots + I(p_{i',j} < P_{i'})]/j}{I(P_1 < P_{i'}) + \dots + I(P_i < P_{i'})} \quad (3)$$

As FDR should be a monotonically increasing function of p-value, we ensure that FDR for a p-value is the minimum of the FDR's for all p-values equal or greater than that p-value:

$$f_{i'} = \min\{r_{i'}, r_{i'+1}, \dots, r_i\} \quad (4)$$

The null hypothesis for test  $i'$  will be rejected if  $f_{i'}$  is smaller than an FDR threshold.

## Supplementary References

- [1] Mossavar-Rahmani, Y. *et al.* Artificially sweetened beverages and stroke, coronary heart disease, and all-cause mortality in the Women’s Health Initiative. *Stroke* **50**, 555–562 (2019).
- [2] Bidulescu, A., Chambless, L. E., Siega-Riz, A. M., Zeisel, S. H. & Heiss, G. Usual choline and betaine dietary intake and incident coronary heart disease: the Atherosclerosis Risk in Communities (ARIC) study. *BMC Cardiovascular Disorders* **7**, 20 (2007).
- [3] Garcia-Arellano, A. *et al.* Dietary inflammatory index and incidence of cardiovascular disease in the PREDIMED study. *Nutrients* **7**, 4124–4138 (2015).
- [4] Guallar-Castillón, P. *et al.* Consumption of fried foods and risk of coronary heart disease: Spanish cohort of the European Prospective Investigation into Cancer and Nutrition study. *BMJ* **344**, e363 (2012).
- [5] Joshi, P. H. *et al.* Remnant lipoprotein cholesterol and incident coronary heart disease: the Jackson heart and Framingham offspring cohort studies. *Journal of the American Heart Association* **5**, e002765 (2016).
- [6] Willett, W. *Nutritional Epidemiology* (Oxford University Press, 2012).
- [7] Kahn, H. A. & Dawber, T. R. The development of coronary heart disease in relation to sequential biennial measures of cholesterol in the Framingham study. *Journal of Clinical Epidemiology* **19**, 611–620 (1966).
- [8] Larsson, S. C., Giovannucci, E. & Wolk, A. Coffee consumption and stomach cancer risk in a cohort of Swedish women. *International Journal of Cancer* **119**, 2186–2189 (2006).
- [9] Kim, E. H. *et al.* Dietary fat and risk of postmenopausal breast cancer in a 20-year follow-up. *American Journal of Epidemiology* **164**, 990–997 (2006).
- [10] Haring, B. *et al.* Dietary protein intake and coronary heart disease in a large community based cohort: results from the Atherosclerosis Risk in Communities (ARIC) Study. *PLoS One* **9** (2014).
- [11] Halton, T. L. *et al.* Low-carbohydrate-diet score and the risk of coronary heart disease in women. *New England Journal of Medicine* **355**, 1991–2002 (2006).

- [12] Streppel, M. T., Ocké, M. C., Boshuizen, H. C., Kok, F. J. & Kromhout, D. Dietary fiber intake in relation to coronary heart disease and all-cause mortality over 40 y: the Zutphen Study. *The American Journal of Clinical Nutrition* **88**, 1119–1125 (2008).
- [13] Eshak, E. S. *et al.* Soft drink intake in relation to incident ischemic heart disease, stroke, and stroke subtypes in Japanese men and women: the Japan Public Health Centre-based study cohort I. *The American Journal of Clinical Nutrition* **96**, 1390–1397 (2012).
- [14] Hu, F. B. *et al.* Dietary fat and coronary heart disease: a comparison of approaches for adjusting for total energy intake and modeling repeated dietary measurements. *American Journal of Epidemiology* **149**, 531–540 (1999).
- [15] Hochberg, Y. A sharper bonferroni procedure for multiple tests of significance. *Biometrika* **75**, 800–802 (1988).
- [16] Gao, X., Starmer, J. & Martin, E. R. A multiple testing correction method for genetic association studies using correlated single nucleotide polymorphisms. *Genetic Epidemiology* **32**, 361–369 (2008).
- [17] Cheverud, J. M. A simple correction for multiple comparisons in interval mapping genome scans. *Heredity* **87**, 52–58 (2001).
- [18] Ge, T., Chen, C. Y., Neale, B. M., Sabuncu, M. R. & Smoller, J. W. Phenome-wide heritability analysis of the UK Biobank. *PLoS Genetics* **13**, 1–21 (2017).
- [19] Benjamini, Y. & Hochberg, Y. Controlling the false discovery rate: a practical and powerful approach to multiple testing. *Journal of the Royal Statistical Society. Series B (Methodological)* 289–300 (1995).
- [20] Benjamini, Y. & Hochberg, Y. On the adaptive control of the false discovery rate in multiple testing with independent statistics. *Journal of Educational and Behavioral Statistics* **25**, 60–83 (2000).
- [21] Reiner, A., Yekutieli, D. & Benjamini, Y. Identifying differentially expressed genes using false discovery rate controlling procedures. *Bioinformatics* **19**, 368–375 (2003).
- [22] Manly, B. F. *Randomization, bootstrap and Monte Carlo methods in biology*, vol. 70 (CRC press, 2006).
- [23] Efron, B. *Large-scale inference: empirical Bayes methods for estimation, testing, and prediction*, vol. 1 (Cambridge University Press, 2012).

- [24] Westfall, P. H. & Young, S. S. *Resampling-based multiple testing: Examples and methods for p-value adjustment*, vol. 279 (John Wiley & Sons, 1993).
- [25] Louis, G. M. B., Smarr, M. M. & Patel, C. J. The exposome research paradigm: an opportunity to understand the environmental basis for human health and disease. *Current Environmental Health Reports* **4**, 89–98 (2017).
- [26] Epstein, M. P. *et al.* A permutation procedure to correct for confounders in case-control studies, including tests of rare variation. *The American Journal of Human Genetics* **91**, 215–223 (2012).
- [27] Patel, C. J. & Manrai, A. K. Development of exposome correlation globes to map out environment-wide associations. In *Pacific Symposium on Biocomputing Co-Chairs*, 231–242 (World Scientific, 2014).
- [28] Tresserra-Rimbau, A., Lamuela-Raventos, R. M. & Moreno, J. J. Polyphenols, food and pharma. current knowledge and directions for future research. *Biochemical Pharmacology* **156**, 186–195 (2018).
- [29] Gao, L. *et al.* Isorhamnetin protects against cardiac hypertrophy through blocking PI3K–AKT pathway. *Molecular & Cellular Biochemistry* **429**, 167–177 (2017).
- [30] Zhang, K., Song, W., Li, D. & Jin, X. Apigenin in the regulation of cholesterol metabolism and protection of blood vessels. *Experimental & Therapeutic Medicine* **13**, 1719–1724 (2017).
- [31] Hu, Y. *et al.* Mediterranean diet and incidence of rheumatoid arthritis in women. *Arthritis Care and Research* **67**, 597–606 (2015).
- [32] Pun, V. C. *et al.* Prospective study of ambient particulate matter exposure and risk of pulmonary embolism in the nurses’ health study cohort. *Environmental Health Perspectives* **123**, 1265–1270 (2015).
- [33] U.S.-Census-Bureau. 2000 Census of Population and Housing File 3. Tech. Rep. 2002.
